# Supplementary material for: Proline-catalyzed synthesis of α-substituted (E)-α,β-unsaturated aldehydes from epoxides
Source: Royal Society of Chemistry journal article supplement (doi:10.1039/d3ob01750h), 2023-01-01

## Supplementary Information

### **Proline-catalyzed synthesis of $\alpha$ -substituted (*E*)- $\alpha,\beta$ -unsaturated aldehydes from epoxides**

Ajay Sharma and Satyendra Kumar Pandey\*

*Department of Chemistry, Institute of Science, Banaras Hindu University, Varanasi, 221005, India*

\*Corresponding Author: Telephone number: +91-8437908745

E-mail address: [skpandey.chem@bhu.ac.in](mailto:skpandey.chem@bhu.ac.in)

#### **Table of contents**

|     |                                                                                                                                                                                                                                                       |         |
|-----|-------------------------------------------------------------------------------------------------------------------------------------------------------------------------------------------------------------------------------------------------------|---------|
| 1.  | General information                                                                                                                                                                                                                                   | S1      |
| 2.  | Optimization                                                                                                                                                                                                                                          | S2-S4   |
| 3.  | Control experiment                                                                                                                                                                                                                                    | S4      |
| 4.  | Structures of epoxides <b>1</b> used in the study                                                                                                                                                                                                     | S5      |
| 5.  | Experimental Section                                                                                                                                                                                                                                  |         |
| 5.1 | Synthesis of substrate epoxides, <b>1</b>                                                                                                                                                                                                             | S5      |
| 5.2 | General procedure for the synthesis of compound, <b>3</b>                                                                                                                                                                                             | S5-S6   |
| 5.3 | Characterization of Compounds, <b>3aa-3au</b> , <b>3ba-3ma</b> , <b>3cm-3fk</b>                                                                                                                                                                       | S6-S15  |
| 5.4 | Synthesis of 4-methyl- <i>N</i> -(2-phenyl-1 <i>H</i> -inden-1-yl)benzenesulfonamide, <b>5</b>                                                                                                                                                        | S15-S16 |
| 5.5 | Synthesis of 1,2-diphenyl-5,6-dihydropyrrolo[2,1- <i>a</i> ]isoquinoline, <b>6</b>                                                                                                                                                                    | S16     |
| 5.6 | Synthesis of ((2 <i>S</i> ,3 <i>S</i> )-2,3-diphenyloxiran-2-yl)methanol, <b>7</b>                                                                                                                                                                    | S16-S17 |
| 5.7 | Synthesis of 4-nitro-2,3-diphenylbutanal, <b>8</b>                                                                                                                                                                                                    | S17     |
| 6.  | References                                                                                                                                                                                                                                            | S17-S18 |
| 7.  | <sup>1</sup> H and <sup>13</sup> C{ <sup>1</sup> H} NMR Spectra of Compounds <b>3aa-3au</b> , <b>3ba-3ma</b> , <b>3cm</b> , <b>3gi</b> , <b>3ei</b> , <b>3ji</b> , <b>3lm</b> , <b>3dk</b> , <b>3fk</b> , <b>5</b> , <b>6</b> , <b>7</b> and <b>8</b> | S19-S62 |
| 8.  | <sup>19</sup> F{ <sup>1</sup> H} NMR Spectra of Compounds <b>3am</b> , <b>3an</b> , <b>3ao</b> , <b>3ja</b> , <b>3ka</b> , <b>3la</b> , <b>3cm</b> , <b>3ji</b> and <b>3lm</b>                                                                        | S63-S67 |
| 9.  | NOESY spectrum of <b>3aj</b>                                                                                                                                                                                                                          | S68     |
| 10. | HPLC chromatograph of <b>7</b> and <b>8</b>                                                                                                                                                                                                           | S69-S72 |

**1. General information:** All the chemicals and solvents were used as received without further purification from Merck, Spectrochem and TCI. Organic extracts were dried over anhydrous sodium sulfate. Progress of the reactions was monitored by TLC using precoated aluminum plates of Merck Kieselgel 60 F254. An oil bath was used for heating. Organic extracts were dried over anhydrous sodium sulfate. Column chromatography was performed on silica gel (100-200 mesh) using a mixture of ethyl acetate/n-hexane. <sup>1</sup>H and <sup>13</sup>C{<sup>1</sup>H} NMR spectra were recorded in CDCl<sub>3</sub> (unless otherwise mentioned) on JEOL ECS and Bruker operating at 500/126 MHz and 600/151 MHz, respectively. Chemical shifts are reported in  $\delta$  (ppm), referenced to TMS and were reported as s (singlet), d (doublet), t (triplet), q (quadruple), dd (doublet of doublet), m (multiplet) etc. The coupling constants *J*, are reported in Hertz (Hz). Mass spectra were recorded on SCIEX X500R QTOF (TOF-MS).

**2. Optimization: Table S1:** Screening of acid catalysis and solvent in the presence of (*S*)-proline.

1a + 2a  $\xrightarrow[\text{Solvent, temp, time}]{\text{Acid, (S)-Proline (20mol\%)}}$  3aa + 4aa

| Sr. No. | Acid (1.0 equiv)     | Solvent                 | benzaldehyde 2a (x equiv) | temp. (°C) | time (h) | yield <sup>b</sup> of 3aa (%) | yield <sup>b</sup> of 4aa (%) |
|---------|----------------------|-------------------------|---------------------------|------------|----------|-------------------------------|-------------------------------|
| 1.      | TfOH                 | HFIP                    | 1                         | rt         | 12       | 0                             | 0                             |
| 2.      | TfOH                 | HFIP                    | 1                         | 45         | 12       | 0                             | 0                             |
| 3.      | TfOH                 | toluene                 | 1                         | rt         | 12       | 0                             | 0                             |
| 4.      | TfOH                 | toluene                 | 1                         | 45         | 5        | 30                            | 15                            |
| 5.      | TfOH                 | toluene                 | 1                         | 60         | 5        | 37                            | 20                            |
| 6.      | TfOH                 | THF                     | 1                         | 60         | 5        | 40                            | 17                            |
| 7.      | TfOH                 | 1,4-dioxane             | 1                         | 60         | 5        | 30                            | trace                         |
| 8.      | TfOH                 | DCM                     | 1                         | 60         | 5        | 0                             | 0                             |
| 9.      | TfOH                 | MeOH                    | 1                         | 60         | 5        | 0                             | 0                             |
| 10.     | TfOH                 | CHCl <sub>3</sub>       | 1                         | 60         | 5        | 0                             | 0                             |
| 11.     | TfOH                 | DMSO                    | 1                         | 60         | 5        | 0                             | 0                             |
| 12.     | TfOH                 | DMF                     | 1                         | 60         | 5        | 0                             | 0                             |
| 13.     | TfOH                 | CH <sub>3</sub> CN      | 1                         | 60         | 5        | 47                            | 22                            |
| 14.     | TfOH                 | CH <sub>3</sub> CN      | 1                         | 90         | 5        | 25                            | ---                           |
| 15.     | TfOH                 | CH <sub>3</sub> CN      | 1                         | rt         | 12       | trace                         | 0                             |
| 16.     | TfOH                 | CH <sub>3</sub> CN      | 1.5                       | 60         | 5        | 58                            | 0                             |
| 17.     | TfOH                 | CH <sub>3</sub> CN      | 1.2                       | 60         | 3        | 60                            | 0                             |
| 18.     | TfOH                 | CH <sub>3</sub> CN      | 0.8                       | 60         | 5        | 30                            | 41                            |
| 19.     | TFA                  | CH <sub>3</sub> CN      | 1.2                       | 60         | 3        | 59                            | 0                             |
| 20.     | MsOH                 | CH <sub>3</sub> CN      | 1.2                       | 60         | 3        | 34                            | 0                             |
| 21.     | <b><i>p</i>-TsOH</b> | <b>CH<sub>3</sub>CN</b> | <b>1.2</b>                | <b>60</b>  | <b>3</b> | <b>78</b>                     | <b>0</b>                      |
| 22.     | <i>p</i> -TsOH       | THF                     | 1.2                       | 60         | 3        | 71                            | 0                             |
| 23.     | <i>p</i> -TsOH       | DCM                     | 1.2                       | 60         | 3        | 46                            | 0                             |
| 24.     | <i>p</i> -TsOH       | Toluene                 | 1.2                       | 60         | 3        | 70                            | 0                             |

General conditions: Epoxide **1a** (1.0 mmol), benzaldehyde **2a** (*x* mmol), (*S*)-proline (20 mol%) and acid (1.0 mmol) in solvent (10 mL) at a specified temp for a specified time, except otherwise noted. Isolated yields

Our investigation commenced by employing styrene oxide **1a** and benzaldehyde **2a** as the model substrates, in the presence of TfOH and (*S*)-proline as an organocatalyst (Table S1). We were delighted to achieve the expected product **3aa** with a 30% yield at 45°C in a span of 5 hours using toluene as the solvent (entry 4). Nonetheless, the aldol self-condensation product **4aa** from styrene oxide **1a** was also obtained with a 15% yield (entry 4). This encouraging result prompted us to conduct a

detailed study of the reaction in order to establish the optimal reaction conditions for the synthesis of acrylaldehydes **3aa**. Evaluation of various aprotic and protic solvents at different temperatures revealed that the reaction demonstrated better yields in acetonitrile at 60 °C (Table S1, entry 13). In order to enhance the yield of **3aa** while minimizing the formation of **4aa**, we optimized the quantity of benzaldehyde **2a**. It was ascertained that the addition of 1.2 equivalents of benzaldehyde was optimal in preventing the formation of **4aa** and the desired product **3aa** was obtained in 60% yield (Table S1, entry 17). Then, when we tested some other acids such as TFA, MsOH, and *p*-TsOH, we noticed an exciting rise in yield and the combination of *p*-TsOH in CH<sub>3</sub>CN furnished the desired acrylaldehydes **3aa** in 78% yield at 60 °C within 3h (Table S1, entry 21). Furthermore, we also examined the effects of different aminocatalysts, however, it was observed that apart from proline, the other tested aminocatalysts did not exhibit catalytic activity in the reactions (Table S2). Motivated by these findings, the impact of *p*-TsOH proportion and temperature was reevaluated at this stage (Table S3) and found that 0.8 eq. of *p*-TsOH at 60 °C was optimal to get the maximum yield of **3aa** in 81% yield. Therefore, 0.8 equiv of *p*-TsOH in CH<sub>3</sub>CN at 60 °C for 3 h in the presence of 20 mol% (*S*)-proline were found to be the optimal conditions for the synthesis of acrylaldehydes **3aa** (Table S3, entry 6).

**Table S2:** Screening of aminocatalysts.

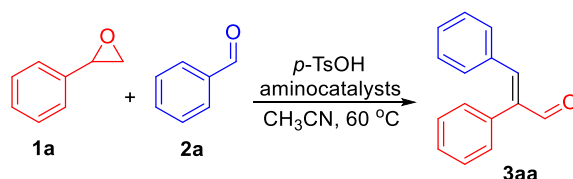

| entry | aminocatalysts<br>( <i>x</i> mole%) | time<br>(h) | yield <sup>b</sup> of<br><b>3aa</b> (%) |
|-------|-------------------------------------|-------------|-----------------------------------------|
| 1     | Pyrrolidine (20 mol%)               | 3           | 0                                       |
| 2     | Piperidine (20 mol%)                | 3           | 0                                       |
| 3     | Morpholine (20 mol%)                | 3           | 0                                       |
| 4     | Triethylamine (20 mol%)             | 3           | 0                                       |
| 5     | Triethylamine (50 mol%)             | 3           | 0                                       |
| 6     | Triethylamine (100 mol%)            | 3           | 0                                       |
| 7     | Alanine (20 mol%)                   | 3           | 0                                       |
| 8     | ( <i>S</i> )-proline (20 mol%)      | 3           | 78                                      |
| 9     | ( <i>R, S</i> )-proline (20 mol%)   | 3           | 76                                      |
| 10    | ( <i>S</i> )-proline (30 mol%)      | 3           | 76                                      |
| 11    | ( <i>S</i> )-proline (10 mol%)      | 3           | 64                                      |

General conditions: Epoxide **1a** (1.0 mmol), benzaldehyde **2a** (1.20 mmol), aminocatalyst (*x* mol%) and *p*-TsOH (1.0 mmol) in CH<sub>3</sub>CN (10 mL) at 60 °C for a specified time, except otherwise noted. Isolated yields

**Table S3:** Acid catalyst loading and temperature variations.

**1a** + **2a**  $\xrightarrow[\text{CH}_3\text{CN, 60 } ^\circ\text{C, 3h}]{p\text{-TsOH, (S)-Proline (20 mol\%)}}$  **3aa**

| entry | <i>p</i> -TsOH ( <i>x</i> equiv) | temp. (°C) | time (h) | yield <sup>b</sup> of <b>3aa</b> (%) |
|-------|----------------------------------|------------|----------|--------------------------------------|
| 1     | 1.0                              | rt         | 12       | 30                                   |
| 2     | 1.0                              | 60         | 3        | 78                                   |
| 3     | 1.0                              | 90         | 3        | 56                                   |
| 4     | 1.0                              | 45         | 3        | 71                                   |
| 5     | 1.5                              | 60         | 3        | 68                                   |
| 6     | 0.8                              | 60         | 3        | 81                                   |
| 7     | 0.5                              | 60         | 3        | 61                                   |

General conditions: Epoxide **1a** (1.0 mmol), benzaldehyde **2a** (1.20 mmol), (*S*)-proline (20 mol%) and *p*-TsOH (*x* mmol) in CH<sub>3</sub>CN (10 mL) at a specified temp, for a specified time, except otherwise noted. Isolated yields

### 3. Control experiments:

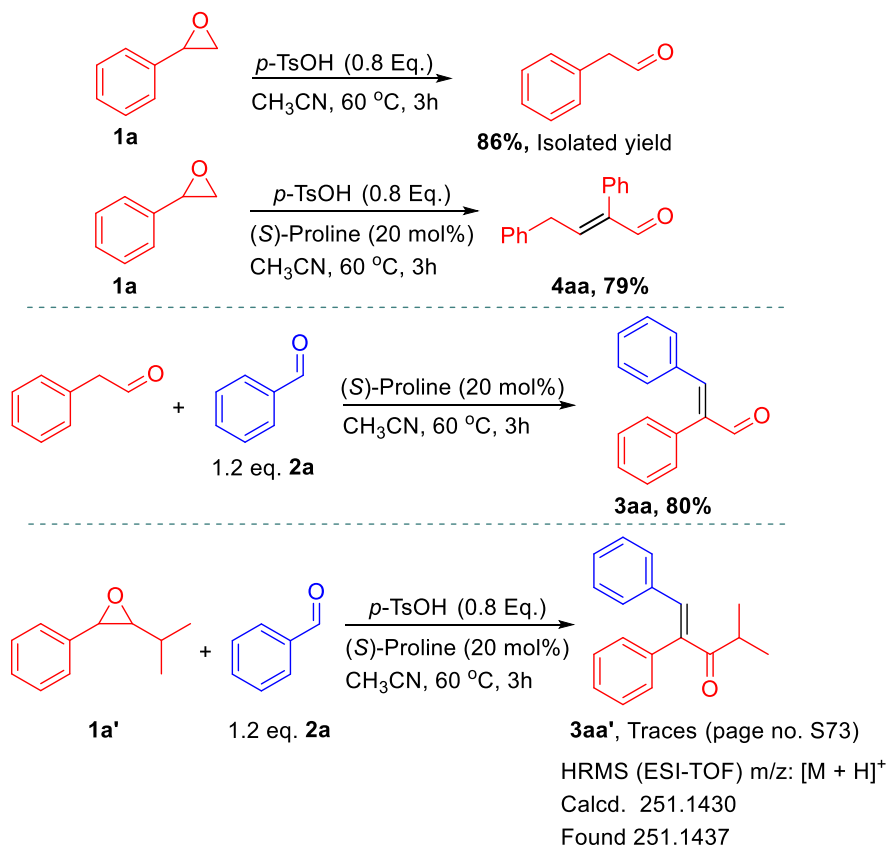

#### 4. Structures of epoxides **1** used in the study:

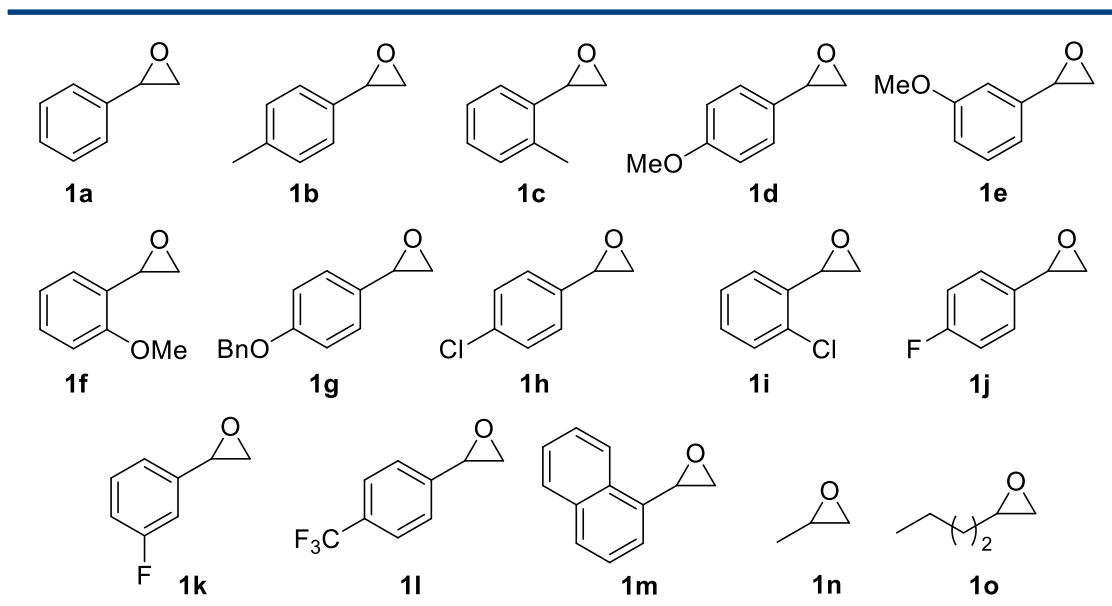

#### 5. Experimental Section:

##### 5.1 Synthesis of substrate epoxides, **1**

**1a**, **1b**, **1h**, **1j**, **1n** and **1o** were purchased and used without further purification. Other epoxides were synthesized according to known literature.<sup>1</sup>

##### General procedure for the synthesis of epoxides, **1**

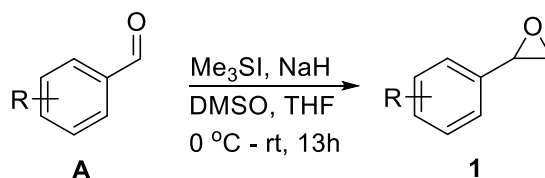

A solution of NaH (8.80 mmol, 2.2 equiv.) and Me<sub>3</sub>SI (8.80 mmol, 2.2 equiv.) in DMSO (7 mL) and THF (5 mL) stirred for 30 min at room temperature under N<sub>2</sub> atmosphere. Then a solution of aldehyde **A** (4.0 mmol, 1.0 equiv.) in THF was added dropwise at 0 °C. After complete addition, the mixture was warmed to room temperature and allowed to stir for 12 hours. After completion of the reaction as monitored by TLC, the reaction mixture was quenched with sat. NH<sub>4</sub>Cl and then extracted with Et<sub>2</sub>O (3 x 10 mL). The organic layer was washed with brine, dried over anhydrous Na<sub>2</sub>SO<sub>4</sub> concentrated in *vacuo* and the crude products were purified by column chromatography with Et<sub>3</sub>N to afforded the desired epoxides **1** in stated yields.

##### 5.2 General procedure for the synthesis of compound, **3**

To a stirred solution of epoxide **1** (0.50 mmol, 1.0 equiv.) in CH<sub>3</sub>CN (5 mL) were added aldehydes **2** (0.60 mmol, 1.20 equiv.), *p*-TsOH (0.40 mmol, 0.80 equiv.) and (*S*)-proline (20 mol%).

The resulting mixture was stirred at 60 °C for 3 h. After completion of the reaction as monitored by TLC, the reaction mixture was cooled to room temperature, quenched with saturated aqueous NaHCO<sub>3</sub> and then extracted with DCM (3 x 10 mL). The organic layer was washed with brine, dried over anhydrous Na<sub>2</sub>SO<sub>4</sub> concentrated in *vacuo* and the crude products were purified by column chromatography (silica gel, 100-200 mesh) which afforded the desired acrylaldehydes **3** in moderate to good yields.

**Note:** Reaction performed in a sealed tube with 1.0 mmol of acetaldehyde for the synthesis of **3at** derivative. Acrylaldehydes **3as**, **3at** and **3au** were not stable. These acrylaldehydes were converted into corresponding alcohol for analysis (After removing solvent, the reaction mixture was treated with NaBH<sub>4</sub> in MeOH at 0 °C).

### 5.3 Characterization of Compounds, **3**

#### (*E*)-2,3-Diphenylacrylaldehyde, **3aa**<sup>2b</sup>

Purified by column chromatography (silica gel 100-200 mesh, ethyl acetate/hexane, v/v = 0.3/9.7); White solid (84 mg, 81%); mp: 90–92 °C; <sup>1</sup>H NMR (500 MHz, CDCl<sub>3</sub>) δ: 9.77 (s, 1H), 7.43–7.36 (m, 4H), 7.30–7.26 (m, 1H), 7.24–7.18 (m, 6H); <sup>13</sup>C{<sup>1</sup>H} NMR (126 MHz, CDCl<sub>3</sub>) δ: 194.0, 150.2, 141.9, 134.2, 133.5, 130.9, 130.4, 129.5, 129.0, 128.6, 128.5.

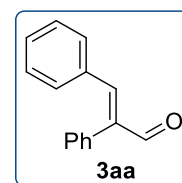

#### (*E*)-2-Phenyl-3-(p-tolyl)acrylaldehyde, **3ab**<sup>2e</sup>

Purified by column chromatography (silica gel 100-200 mesh, ethyl acetate/hexane, v/v = 0.3/9.7); White solid (85 mg, 77%); mp: 98–100 °C; <sup>1</sup>H NMR (500 MHz, CDCl<sub>3</sub>) δ: 9.74 (s, 1H), 7.42–7.35 (m, 4H), 7.19 (d, *J* = 6.8 Hz, 2H), 7.09 (d, *J* = 7.9 Hz, 2H), 7.03 (d, *J* = 7.9 Hz, 2H), 2.30 (s, 3H); <sup>13</sup>C{<sup>1</sup>H} NMR (126 MHz, CDCl<sub>3</sub>) δ: 194.1, 150.5, 141.2, 141.0, 133.8, 131.4, 130.9, 129.5, 129.4, 129.0, 128.4, 21.6.

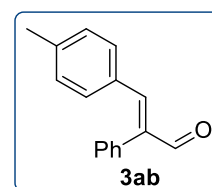

#### (*E*)-2-Phenyl-3-(o-tolyl)acrylaldehyde, **3ac**<sup>2e</sup>

Purified by column chromatography (silica gel 100-200 mesh, ethyl acetate/hexane, v/v = 0.3/9.7); White solid (84 mg, 76%); mp: 97–99 °C; <sup>1</sup>H NMR (500 MHz, CDCl<sub>3</sub>) δ: 9.82 (s, 1H), 7.60 (s, 1H), 7.32–7.30 (m, 3H), 7.21–7.17 (m, 4H), 6.92–6.87 (m, 2H), 2.43 (s, 3H); <sup>13</sup>C{<sup>1</sup>H} NMR (126 MHz, CDCl<sub>3</sub>) δ: 193.9, 148.8, 142.3, 137.9, 133.4, 132.9, 130.6, 129.8, 129.74, 129.70, 128.6, 128.2, 125.7, 20.2.

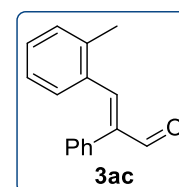

#### (*E*)-3-(4-Methoxyphenyl)-2-phenylacrylaldehyde, **3ad**<sup>2e</sup>

Purified by column chromatography (silica gel 100-200 mesh, ethyl acetate/hexane, v/v = 0.5/9.5); White solid (84 mg, 71%); mp: 140–142 °C;  $^1\text{H}$  NMR (500 MHz,  $\text{CDCl}_3$ )  $\delta$ : 9.72 (s, 1H), 7.44–7.37 (m, 3H), 7.33 (s, 1H), 7.21 (d,  $J$  = 7.4 Hz, 2H), 7.16 (d,  $J$  = 8.1 Hz, 2H), 6.75 (d,  $J$  = 8.6 Hz, 2H), 3.79 (s, 3H);

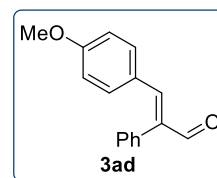

$^{13}\text{C}\{^1\text{H}\}$  NMR (126 MHz,  $\text{CDCl}_3$ )  $\delta$ : 194.0, 161.4, 150.3, 139.9, 133.9, 132.9, 129.5, 129.1, 128.3, 126.8, 114.2, 55.4.

### (*E*)-3-(2-Methoxyphenyl)-2-phenylacrylaldehyde, 3ae

Purified by column chromatography (silica gel 100-200 mesh, ethyl acetate/hexane, v/v = 0.5/9.5); White solid (86 mg, 73%); mp: 142–144 °C;  $^1\text{H}$  NMR (500 MHz,  $\text{CDCl}_3$ )  $\delta$ : 9.80 (s, 1H), 7.82 (s, 1H), 7.39–7.33 (m, 3H), 7.26 (d,  $J$  = 7.2 Hz, 1H), 7.20 (d,  $J$  = 7.2 Hz, 2H), 6.89 (t,  $J$  = 9.2 Hz, 2H), 6.64 (t,  $J$  = 7.5 Hz, 1H), 3.90 (s, 3H);

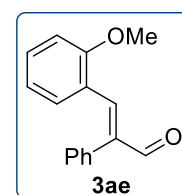

$^{13}\text{C}\{^1\text{H}\}$  NMR (126 MHz,  $\text{CDCl}_3$ )  $\delta$ : 194.3, 158.3, 145.3, 141.5, 133.6, 131.8, 130.7, 129.6, 128.8, 128.2, 123.2, 120.2, 110.9, 55.7. HRMS (ESI-TOF)  $m/z$ :  $[\text{M} + \text{Na}]^+$  calcd. for  $\text{C}_{16}\text{H}_{14}\text{NaO}_2$  261.0886; Found 261.0881; IR (KBr,  $\text{cm}^{-1}$ ): 3004, 2837, 1682, 1619, 1467, 778.

### (*E*)-3-(3-Methoxyphenyl)-2-phenylacrylaldehyde, 3af

Purified by column chromatography (silica gel 100-200 mesh, ethyl acetate/hexane, v/v = 0.5/9.5); White solid (95 mg, 80%); mp: 145–147 °C;  $^1\text{H}$  NMR (500 MHz,  $\text{CDCl}_3$ )  $\delta$ : 9.76 (s, 1H), 7.45–7.36 (m, 4H), 7.21–7.15 (m, 3H), 6.87–6.83 (m, 2H), 6.66 (s, 1H), 3.50 (s, 3H);  $^{13}\text{C}\{^1\text{H}\}$  NMR (126 MHz,  $\text{CDCl}_3$ )

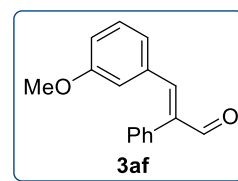

$\delta$ : 193.7, 159.6, 149.6, 142.3, 135.5, 133.9, 129.6, 128.9, 128.4, 123.9, 117.3, 114.9, 55.0. HRMS (ESI-TOF)  $m/z$ :  $[\text{M} + \text{Na}]^+$  calcd. for  $\text{C}_{16}\text{H}_{14}\text{NaO}_2$  261.0886; Found 261.0880; IR (KBr,  $\text{cm}^{-1}$ ): 3014, 2952, 2850, 1662, 1598, 1442, 789.

### (*E*)-3-(4-(Benzyloxy)phenyl)-2-phenylacrylaldehyde, 3ag

Purified by column chromatography (silica gel 100-200 mesh, ethyl acetate/hexane, v/v = 0.5/9.5); Yellow solid (116 mg, 74%); mp: 150–152 °C;  $^1\text{H}$  NMR (500 MHz,  $\text{CDCl}_3$ )  $\delta$ : 9.72 (s, 1H), 7.44–7.32 (m, 9H), 7.20 (d,  $J$  = 7.4 Hz, 2H), 7.16 (d,  $J$  = 8.9 Hz, 2H), 6.82 (d,  $J$  = 9.0 Hz, 2H), 5.04 (s, 2H);  $^{13}\text{C}\{^1\text{H}\}$

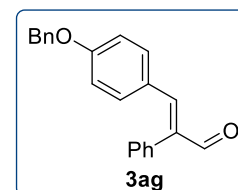

NMR (126 MHz,  $\text{CDCl}_3$ )  $\delta$ : 193.9, 160.6, 150.1, 140.1, 136.5, 133.9, 132.9, 129.5, 129.1, 128.8, 128.3, 127.5, 127.1, 115.0, 70.2. HRMS (ESI-TOF)  $m/z$ :  $[\text{M} + \text{H}]^+$  calcd. for  $\text{C}_{22}\text{H}_{19}\text{O}_2$  315.1380; Found 315.1370; IR (KBr,  $\text{cm}^{-1}$ ): 3353, 3032, 2854, 1683, 1605, 1510, 835.

### (*E*)-3-(4-(Dimethylamino)phenyl)-2-phenylacrylaldehyde, 3ah

Purified by column chromatography (silica gel 100-200 mesh, ethyl acetate/hexane, v/v = 0.8/9.2); Yellow solid (92 mg, 74%); mp: 153–155 °C; **<sup>1</sup>H NMR** (600 MHz, CDCl<sub>3</sub>) δ: 9.66 (s, 1H), 7.43 (t, *J* = 7.4 Hz, 2H), 7.37 (d, *J* = 7.1 Hz, 1H), 7.28 (s, 1H), 7.23 (d, *J* = 7.5 Hz, 2H), 7.10 (d, *J* = 8.4 Hz, 2H), 6.50 (d, *J* = 8.4 Hz, 2H), 2.98 (s, 6H); **<sup>13</sup>C{<sup>1</sup>H} NMR** (151 MHz, CDCl<sub>3</sub>) δ: 193.9, 151.6, 151.5, 137.6, 134.9, 133.1, 129.7, 129.0, 127.9, 121.9, 111.5, 40.1. **HRMS** (ESI-TOF) *m/z*: [M + Na]<sup>+</sup> calcd. for C<sub>17</sub>H<sub>17</sub>NNaO 274.1202; Found 274.1195; **IR** (KBr, cm<sup>-1</sup>): 3008, 2835, 1685, 1235, 790.

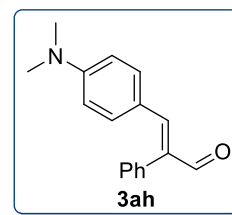

**(*E*)-3-(4-Nitrophenyl)-2-phenylacrylaldehyde, 3ai<sup>2f</sup>**

Purified by column chromatography (silica gel 100-200 mesh, ethyl acetate/hexane, v/v = 0.7/9.3); Brown solid (107 mg, 85%); mp: 140–142 °C; **<sup>1</sup>H NMR** (500 MHz, CDCl<sub>3</sub>) δ: 9.77 (s, 1H), 8.01 (d, *J* = 8.2 Hz, 2H), 7.38–7.35 (m, 4H), 7.28 (d, *J* = 8.4 Hz, 2H), 7.10 (dd, *J* = 6.0, 2.6 Hz, 2H); **<sup>13</sup>C{<sup>1</sup>H} NMR** (126 MHz, CDCl<sub>3</sub>) δ: 193.2, 148.1, 145.9, 144.6, 140.5, 132.3, 131.2, 129.3, 129.2, 129.1, 123.7.

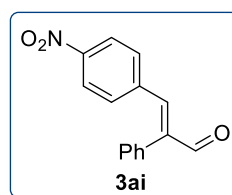

**(*E*)-3-(2-Nitrophenyl)-2-phenylacrylaldehyde, 3aj**

Purified by column chromatography (silica gel 100-200 mesh, ethyl acetate/hexane, v/v = 0.7/9.3); Brown solid (106 mg, 84%); mp: 145–147 °C; **<sup>1</sup>H NMR** (500 MHz, CDCl<sub>3</sub>) δ: 9.89 (s, 1H), 8.14 (d, *J* = 8.3 Hz, 1H), 7.80 (s, 1H), 7.43 (t, *J* = 7.7 Hz, 1H), 7.36 (t, *J* = 7.4 Hz, 1H), 7.28–7.26 (m, 3H), 7.12–7.10 (m, 2H), 7.01 (d, *J* = 7.7 Hz, 1H); **<sup>13</sup>C{<sup>1</sup>H} NMR** (126 MHz, CDCl<sub>3</sub>) δ: 193.0, 148.1, 146.1, 143.2, 133.4, 131.8, 131.9, 131.1, 130.0, 129.8, 128.6, 128.5, 124.9. **HRMS** (ESI-TOF) *m/z*: [M + H]<sup>+</sup> calcd. for C<sub>15</sub>H<sub>12</sub>NO<sub>3</sub> 254.0812; Found 254.0812; **IR** (KBr, cm<sup>-1</sup>): 3037, 2844, 1683, 1606, 1570, 1367, 792.

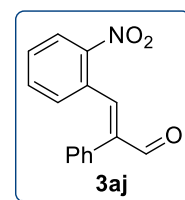

**(*E*)-3-(4-Chlorophenyl)-2-phenylacrylaldehyde, 3ak<sup>2e</sup>**

Purified by column chromatography (silica gel 100-200 mesh, ethyl acetate/hexane, v/v = 0.5/9.5); White solid (100 mg, 83%); mp: 152–154 °C; **<sup>1</sup>H NMR** (500 MHz, CDCl<sub>3</sub>) δ: 9.76 (s, 1H), 7.45–7.37 (m, 3H), 7.34 (s, 1H), 7.21–7.16 (m, 4H), 7.13 (d, *J* = 9.0 Hz, 2H); **<sup>13</sup>C{<sup>1</sup>H} NMR** (126 MHz, CDCl<sub>3</sub>) δ: 193.7, 148.4, 142.3, 136.3, 133.1, 132.6, 131.9, 129.4, 129.1, 128.9, 128.7.

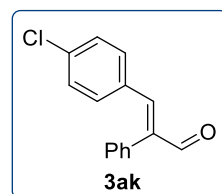

**(*E*)-3-(2-Chlorophenyl)-2-phenylacrylaldehyde, 3al<sup>2b</sup>**

Purified by column chromatography (silica gel 100-200 mesh, ethyl acetate/hexane, v/v = 0.5/9.5); White solid (101 mg, 84%); mp: 151–153 °C; **<sup>1</sup>H NMR** (600 MHz, CDCl<sub>3</sub>) δ: 9.85 (s, 1H), 7.72 (s, 1H), 7.43 (dd, *J* = 8.1, 1.0 Hz, 1H), 7.35–7.33 (m,

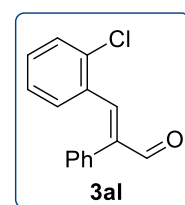

3H), 7.22–7.19 (m, 1H), 7.17–7.15 (m, 2H), 6.95–6.90 (m, 2H);  $^{13}\text{C}\{^1\text{H}\}$  NMR (151 MHz,  $\text{CDCl}_3$ )  $\delta$ : 193.7, 146.1, 143.2, 135.3, 132.8, 132.4, 131.2, 130.8, 129.9, 129.7, 128.9, 128.6, 126.5.

**(E)-3-(4-Fluorophenyl)-2-phenylacrylaldehyde, 3am<sup>2e</sup>**

Purified by column chromatography (silica gel 100-200 mesh, ethyl acetate/hexane, v/v = 0.7/9.3); White solid (96 mg, 85%); mp: 135–137 °C;  $^1\text{H}$  NMR (600 MHz,  $\text{CDCl}_3$ )  $\delta$ : 9.75 (s, 1H), 7.43–7.38 (m, 3H), 7.35 (s, 1H), 7.20–7.17 (m, 4H), 6.92 (t,  $J$  = 8.6 Hz, 2H);  $^{13}\text{C}\{^1\text{H}\}$  NMR (151 MHz,  $\text{CDCl}_3$ )  $\delta$ : 193.8 (s), 163.7 (d,  $J$  = 252.7 Hz), 148.8, 141.6, 133.3, 132.9 (d,  $J$  = 8.4 Hz), 130.4 (d,  $J$  = 2.8 Hz), 129.4, 129.1, 128.6, 115.9 (d,  $J$  = 22.0 Hz).  $^{19}\text{F}\{^1\text{H}\}$  NMR (471 MHz,  $\text{CDCl}_3$ )  $\delta$ : –111.15.

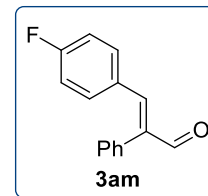

**(E)-3-(3-Fluorophenyl)-2-phenylacrylaldehyde, 3an<sup>2b</sup>**

Purified by column chromatography (silica gel 100-200 mesh, ethyl acetate/hexane, v/v = 0.7/9.3); White solid (94 mg, 84%); mp: 132–134 °C;  $^1\text{H}$  NMR (500 MHz,  $\text{CDCl}_3$ )  $\delta$ : 9.78 (s, 1H), 7.44–7.38 (m, 3H), 7.35 (s, 1H), 7.24–7.16 (m, 3H), 7.02–6.97 (m, 2H), 6.85 (d,  $J$  = 9.5 Hz, 1H);  $^{13}\text{C}\{^1\text{H}\}$  NMR (126 MHz,  $\text{CDCl}_3$ )  $\delta$ : 193.7, 162.5 (d,  $J$  = 246.4 Hz), 148.2, 142.9, 136.2 (d,  $J$  = 8.1 Hz), 132.9, 130.1 (d,  $J$  = 8.3 Hz), 129.3, 129.1, 128.9, 126.7 (d,  $J$  = 2.4 Hz), 117.3, 117.1 (d,  $J$  = 2.8 Hz), 116.9;  $^{19}\text{F}\{^1\text{H}\}$  NMR (471 MHz,  $\text{CDCl}_3$ )  $\delta$ : –112.13.

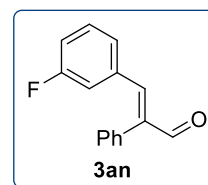

**(E)-2-Phenyl-3-(4-(trifluoromethyl)phenyl)acrylaldehyde, 3ao<sup>2e</sup>**

Purified by column chromatography (silica gel 100-200 mesh, ethyl acetate/hexane, v/v = 0.5/9.5); White solid (118 mg, 86%); mp: 122–124 °C;  $^1\text{H}$  NMR (500 MHz,  $\text{CDCl}_3$ )  $\delta$ : 9.80 (s, 1H), 7.47 (d,  $J$  = 7.9 Hz, 2H), 7.40 (s, 4H), 7.29 (d,  $J$  = 7.9 Hz, 2H), 7.17 (d,  $J$  = 6.4 Hz, 2H);  $^{13}\text{C}\{^1\text{H}\}$  NMR (126 MHz,  $\text{CDCl}_3$ )  $\delta$ : 193.6, 147.6, 143.6, 137.6, 132.7, 131.5 (q,  $J$  = 32.9 Hz), 130.8, 129.3, 129.1, 128.8, 125.5 (d,  $J$  = 3.4 Hz), 124.9 (q,  $J$  = 272.4 Hz);  $^{19}\text{F}\{^1\text{H}\}$  NMR (471 MHz,  $\text{CDCl}_3$ )  $\delta$ : –62.87.

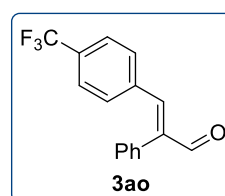

**(E)-4-(3-Oxo-2-phenylprop-1-en-1-yl)benzonitrile, 3ap**

Purified by column chromatography (silica gel 100-200 mesh, ethyl acetate/hexane, v/v = 0.5/9.5); White solid (94 mg, 81%); mp: 124–126 °C;  $^1\text{H}$  NMR (500 MHz,  $\text{CDCl}_3$ )  $\delta$ : 9.75 (s, 1H), 7.44 (d,  $J$  = 7.9 Hz, 2H), 7.35–7.34 (m, 3H), 7.31 (s, 1H), 7.23–7.19 (m, 2H), 7.09 (dd,  $J$  = 6.4, 2.4 Hz, 2H);  $^{13}\text{C}\{^1\text{H}\}$  NMR (126 MHz,  $\text{CDCl}_3$ )  $\delta$ : 193.3, 146.6, 144.2, 138.6, 132.4, 132.3, 130.9, 129.3, 129.2, 129.0, 118.4, 113.2. HRMS (ESI-TOF)  $m/z$ :  $[\text{M} + \text{H}]^+$  calcd. for  $\text{C}_{16}\text{H}_{12}\text{NO}$  234.0913; Found 234.0909; IR (KBr,  $\text{cm}^{-1}$ ): 3051, 2842, 2228, 1667, 1626, 836.

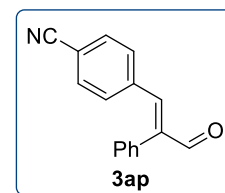

**(*E*)-2-Phenyl-3-(pyridin-2-yl)acrylaldehyde, 3aq**

Purified by column chromatography (silica gel 100-200 mesh, ethyl acetate/hexane, v/v = 0.7/9.3); White solid (84 mg, 81%); mp: 160–162 °C; <sup>1</sup>H NMR (600 MHz, CDCl<sub>3</sub>) δ: 9.86 (s, 1H), 8.67 (s, 1H), 7.55 (s, 1H), 7.43–7.41 (m, 4H), 7.20–7.17 (m, 3H), 6.95 (d, *J* = 7.9 Hz, 1H); <sup>13</sup>C{<sup>1</sup>H} NMR (151 MHz, CDCl<sub>3</sub>) δ: 194.1, 153.6, 150.2, 149.9, 144.1, 136.0, 132.7, 129.4, 129.0, 128.9, 125.4, 123.8. HRMS (ESI-TOF) *m/z*: [M + Na]<sup>+</sup> calcd. for C<sub>14</sub>H<sub>11</sub>NNaO 232.0733; Found 232.0731; IR (KBr, cm<sup>-1</sup>): 3058, 2926, 1778, 1688, 749.

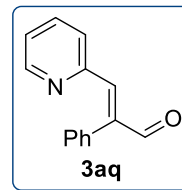

**(*E*)-2-Phenyl-3-(thiophen-2-yl)acrylaldehyde, 3ar**

Purified by column chromatography (silica gel 100-200 mesh, ethyl acetate/hexane, v/v = 0.3/9.7); Brown solid (82 mg, 77%); mp: 135–137 °C; <sup>1</sup>H NMR (500 MHz, CDCl<sub>3</sub>) δ: 9.72 (s, 1H), 7.61 (s, 1H), 7.49–7.44 (m, 3H), 7.35 (d, *J* = 4.9 Hz, 1H), 7.25 (dd, *J* = 26.9, 5.2 Hz, 3H), 7.00 (t, *J* = 4.2 Hz, 1H); <sup>13</sup>C{<sup>1</sup>H} NMR (126 MHz, CDCl<sub>3</sub>) δ: 192.9, 142.3, 139.6, 138.2, 134.4, 133.1, 132.3, 129.7, 129.3, 128.9, 127.3. HRMS (ESI-TOF) *m/z*: [M + Na]<sup>+</sup> calcd. for C<sub>13</sub>H<sub>10</sub>NaOS 237.0345; Found 237.0343; IR (KBr, cm<sup>-1</sup>): 3049, 2824, 1668, 1596, 840.

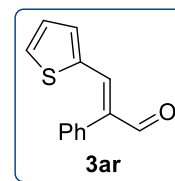

**(*E*)-4-Methyl-2-phenylpent-2-en-1-ol, 3as<sup>2d</sup>**

Purified by column chromatography (silica gel 100-200 mesh, ethyl acetate/hexane, v/v = 1.5/8.5); Colorless liquid (63 mg, 72%); <sup>1</sup>H NMR (600 MHz, CDCl<sub>3</sub>) δ: 7.35 (t, *J* = 7.6 Hz, 2H), 7.28 (t, *J* = 7.4 Hz, 1H), 7.20 (d, *J* = 7.2 Hz, 2H), 5.70 (d, *J* = 9.6 Hz, 0.04H, *Z*-isomer, minor), 5.51 (d, *J* = 10.1 Hz, 1H), 4.58 (s, 0.08H, *Z*-isomer, minor), 4.27 (s, 2H), 2.42–2.32 (m, 1H), 0.94 (d, *J* = 6.7 Hz, 6H); <sup>13</sup>C{<sup>1</sup>H} NMR (151 MHz, CDCl<sub>3</sub>) δ: 138.9, 138.0, 136.3, 128.7, 128.4, 127.2, 68.3, 27.7, 23.3. (*E/Z* isomers are inseparable through column chromatography)

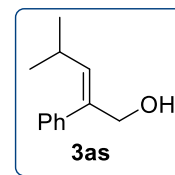

**(*E*)-2-Phenylbut-2-en-1-ol, 3at<sup>2a</sup>**

Purified by column chromatography (silica gel 100-200 mesh, ethyl acetate/hexane, v/v = 1.5/8.5); Colorless liquid (54 mg, 73%); <sup>1</sup>H NMR (600 MHz, CDCl<sub>3</sub>) δ: 7.36 (t, *J* = 7.6 Hz, 2H), 7.27 (t, *J* = 7.4 Hz, 1H), 7.22 (d, *J* = 7.1 Hz, 2H), 5.96 (q, *J* = 6.4 Hz, 0.03H, *Z*-isomer, minor), 5.82 (q, *J* = 6.9 Hz, 1H), 4.58 (s, 0.05H, *Z*-isomer, minor), 4.30 (s, 2H), 1.64 (t, *J* = 10.5 Hz, 3H); <sup>13</sup>C{<sup>1</sup>H} NMR (151 MHz, CDCl<sub>3</sub>) δ: 141.1, 138.4, 128.8, 128.4, 127.2, 123.5, 68.2, 14.5. (*E/Z* isomers are inseparable through column chromatography)

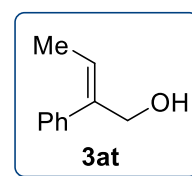

**(*E*)-2-Phenyloct-2-en-1-ol, 3au<sup>2a</sup>**

Purified by column chromatography (silica gel 100-200 mesh, ethyl acetate/hexane, v/v = 1.5/8.5); Colorless liquid (66 mg, 65%); **<sup>1</sup>H NMR** (600 MHz, CDCl<sub>3</sub>)  $\delta$ : 7.35–7.32 (m, 2H), 7.28–7.24 (m, 1H), 7.20 (d,  $J$  = 7.3 Hz, 2H), 5.89 (t,  $J$  = 7.5 Hz, 0.03 H, Z-isomer, minor), 5.72 (t,  $J$  = 7.4 Hz, 1H), 4.57 (d,  $J$  = 4.4 Hz, 0.06 H, Z-isomer, minor), 4.30 (d,  $J$  = 5.9 Hz, 2H), 1.99 (q,  $J$  = 7.4 Hz, 2H), 1.65 (t,  $J$  = 6.1 Hz, 1H),

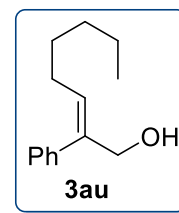

1.39–1.32 (m, 2H), 1.27–1.17 (m, 4H), 0.84 (t,  $J$  = 6.8 Hz, 3H); **<sup>13</sup>C{<sup>1</sup>H} NMR** (151 MHz, CDCl<sub>3</sub>)  $\delta$ : 140.2, 138.7, 129.4, 128.8, 128.4, 127.1, 68.2, 31.5, 29.6, 28.6, 22.6, 14.1. (*E/Z* isomers are inseparable through column chromatography)

**(*E*)-3-Phenyl-2-(p-tolyl)acrylaldehyde, 3ba<sup>2b</sup>**

Purified by column chromatography (silica gel 100-200 mesh, ethyl acetate/hexane, v/v = 0.3/9.7); White solid (93 mg, 84%); mp: 100–102 °C; **<sup>1</sup>H NMR** (500 MHz, CDCl<sub>3</sub>)  $\delta$ : 9.76 (s, 1H), 7.36 (s, 1H), 7.29 (dd,  $J$  = 8.4, 4.2 Hz, 1H), 7.26–7.20 (m, 6H), 7.08 (d,  $J$  = 7.7 Hz, 2H), 2.39 (s, 3H); **<sup>13</sup>C{<sup>1</sup>H} NMR** (126 MHz, CDCl<sub>3</sub>)  $\delta$ : 194.3, 150.0, 141.9, 138.3, 134.3, 130.8, 130.3, 130.2, 129.7, 129.3, 128.6, 21.5.

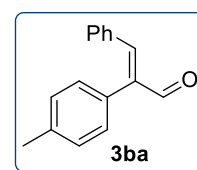

**(*E*)-3-Phenyl-2-(o-tolyl)acrylaldehyde, 3ca<sup>2b</sup>**

Purified by column chromatography (silica gel 100-200 mesh, ethyl acetate/hexane, v/v = 0.3/9.7); White solid (91 mg, 82%); mp: 99–101 °C; **<sup>1</sup>H NMR** (500 MHz, CDCl<sub>3</sub>)  $\delta$ : 9.78 (s, 1H), 7.46 (s, 1H), 7.35–7.27 (m, 3H), 7.26–7.20 (m, 3H), 7.13 (d,  $J$  = 7.6 Hz, 2H), 7.02 (d,  $J$  = 7.4 Hz, 1H), 2.07 (s, 3H); **<sup>13</sup>C{<sup>1</sup>H} NMR** (126 MHz, CDCl<sub>3</sub>)  $\delta$ : 194.0, 150.4, 141.9, 136.3, 134.3, 133.5, 130.7, 130.6, 129.2, 128.8, 128.7, 126.6, 19.6.

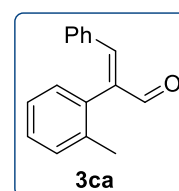

**(*E*)-2-(4-Methoxyphenyl)-3-phenylacrylaldehyde, 3da<sup>2g</sup>**

Purified by column chromatography (silica gel 100-200 mesh, ethyl acetate/hexane, v/v = 0.5/9.5); White solid (101 mg, 85%); mp: 138–140 °C; **<sup>1</sup>H NMR** (600 MHz, CDCl<sub>3</sub>)  $\delta$ : 9.76 (s, 1H), 7.35 (s, 1H), 7.30–7.25 (m, 5H), 7.13 (d,  $J$  = 7.3 Hz, 2H), 6.94 (d,  $J$  = 7.3 Hz, 2H), 3.84 (s, 3H); **<sup>13</sup>C{<sup>1</sup>H} NMR** (151 MHz, CDCl<sub>3</sub>)  $\delta$ : 194.5, 159.7, 150.1, 141.5, 134.4, 130.8, 130.2, 128.6, 125.4, 114.5, 55.4.

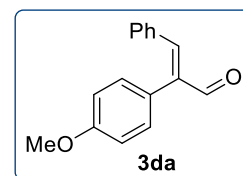

**(*E*)-2-(3-Methoxyphenyl)-3-phenylacrylaldehyde, 3ea<sup>2b</sup>**

Purified by column chromatography (silica gel 100-200 mesh, ethyl acetate/hexane, v/v = 0.5/9.5); White solid (94 mg, 79%); mp: 145–147 °C; **<sup>1</sup>H NMR** (500 MHz, CDCl<sub>3</sub>)  $\delta$ : 9.76 (s, 1H), 7.38 (s, 1H), 7.32 (dd,  $J$  = 15.6, 7.6 Hz, 2H), 7.25–7.22 (m, 4H), 6.93 (d,  $J$  = 8.1 Hz, 1H), 6.77 (d,  $J$  = 7.5 Hz, 1H),

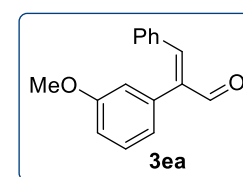

6.73 (s, 1H), 3.76 (s, 3H);  $^{13}\text{C}\{^1\text{H}\}$  NMR (126 MHz,  $\text{CDCl}_3$ )  $\delta$ : 193.9, 160.1, 150.2, 141.8, 134.8, 134.0, 130.9, 130.4, 130.1, 128.6, 121.7, 114.7, 114.2, 55.3.

**(E)-2-(2-Methoxyphenyl)-3-phenylacrylaldehyde, 3fa**

Purified by column chromatography (silica gel 100-200 mesh, ethyl acetate/hexane, v/v = 0.5/9.5); White solid (98 mg, 83%); mp: 146–148 °C;  $^1\text{H}$  NMR (500 MHz,  $\text{CDCl}_3$ )  $\delta$ : 9.74 (s, 1H), 7.46 (s, 1H), 7.39 (t,  $J$  = 7.8 Hz, 1H), 7.31–7.20 (m, 5H), 7.04 (d,  $J$  = 7.4 Hz, 1H), 6.99 (t,  $J$  = 7.4 Hz, 2H), 3.68 (s, 3H);  $^{13}\text{C}\{^1\text{H}\}$  NMR (126 MHz,  $\text{CDCl}_3$ )  $\delta$ : 193.9, 157.2, 149.8, 139.0, 134.6, 130.7, 130.5, 130.2, 130.1, 128.6, 122.9, 121.3, 111.6, 55.7. HRMS (ESI-TOF)  $m/z$ :  $[\text{M} + \text{H}]^+$  calcd. for  $\text{C}_{16}\text{H}_{15}\text{O}_2$  239.1067; Found 239.1063; IR (KBr,  $\text{cm}^{-1}$ ): 3003, 2835, 1685, 1597, 1493, 787.

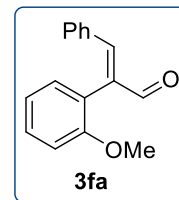

**(E)-2-(4-(Benzyloxy)phenyl)-3-phenylacrylaldehyde, 3ga**

Purified by column chromatography (silica gel 100-200 mesh, ethyl acetate/hexane, v/v = 0.5/9.5); Yellow solid (131 mg, 84%); mp: 155–157 °C;  $^1\text{H}$  NMR (500 MHz,  $\text{CDCl}_3$ )  $\delta$ : 9.75 (s, 1H), 7.45 (d,  $J$  = 7.4 Hz, 2H), 7.40 (t,  $J$  = 7.4 Hz, 2H), 7.34 (s, 2H), 7.31–7.21 (m, 5H), 7.13 (d,  $J$  = 8.1 Hz, 2H), 7.02 (d,  $J$  = 8.6 Hz, 2H), 5.09 (s, 2H);  $^{13}\text{C}\{^1\text{H}\}$  NMR (126 MHz,  $\text{CDCl}_3$ )  $\delta$ : 194.4, 158.9, 150.1, 141.4, 136.9, 134.3, 130.8, 130.7, 130.2, 128.7, 128.6, 128.1, 127.7, 125.6, 115.4, 70.1. HRMS (ESI-TOF)  $m/z$ :  $[\text{M} + \text{H}]^+$  calcd. for  $\text{C}_{22}\text{H}_{19}\text{O}_2$  315.1380; Found 315.1377; IR (KBr,  $\text{cm}^{-1}$ ): 3034, 2864, 1685, 1602, 1509, 851.

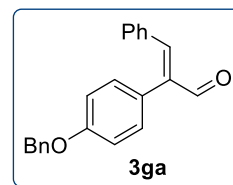

**(E)-2-(4-Chlorophenyl)-3-phenylacrylaldehyde, 3ha<sup>2b</sup>**

Purified by column chromatography (silica gel 100-200 mesh, ethyl acetate/hexane, v/v = 0.5/9.5); White solid (98 mg, 81%); mp: 146–148 °C;  $^1\text{H}$  NMR (500 MHz,  $\text{CDCl}_3$ )  $\delta$ : 9.75 (s, 1H), 7.44–7.36 (m, 3H), 7.33 (t,  $J$  = 7.1 Hz, 1H), 7.30–7.19 (m, 4H), 7.15 (d,  $J$  = 7.8 Hz, 2H);  $^{13}\text{C}\{^1\text{H}\}$  NMR (126 MHz,  $\text{CDCl}_3$ )  $\delta$ : 193.6, 150.9, 140.7, 134.5, 133.8, 131.7, 131.0, 130.8, 130.6, 129.3, 128.8.

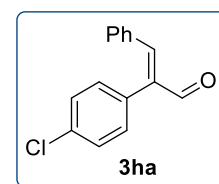

**(E)-2-(2-Chlorophenyl)-3-phenylacrylaldehyde, 3ia<sup>2b</sup>**

Purified by column chromatography (silica gel 100-200 mesh, ethyl acetate/hexane, v/v = 0.5/9.5); White solid (94 mg, 78%); mp: 140–142 °C;  $^1\text{H}$  NMR (600 MHz,  $\text{CDCl}_3$ )  $\delta$ : 9.76 (s, 1H), 7.53 (s, 1H), 7.51 (dd,  $J$  = 8.0, 0.9 Hz, 1H), 7.37 (td,  $J$  = 7.7, 1.7 Hz, 1H), 7.32 (q,  $J$  = 6.7 Hz, 2H), 7.25 (t,  $J$  = 7.7 Hz, 2H), 7.16 (d,  $J$  = 7.6 Hz, 2H), 7.12 (dd,  $J$  = 7.5, 1.6 Hz, 1H);  $^{13}\text{C}\{^1\text{H}\}$  NMR (151 MHz,  $\text{CDCl}_3$ )  $\delta$ : 192.9, 150.8, 139.7, 133.9, 133.7, 133.3, 131.1, 130.8, 130.6, 130.1, 130.0, 128.8, 127.5.

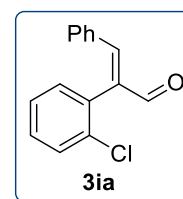

**(E)-2-(4-Fluorophenyl)-3-phenylacrylaldehyde, 3ja<sup>2c</sup>**

Purified by column chromatography (silica gel 100-200 mesh, ethyl acetate/hexane, v/v = 0.5/9.5); White solid (84 mg, 75%); mp: 128–130 °C; <sup>1</sup>H NMR (500 MHz, CDCl<sub>3</sub>) δ: 9.76 (s, 1H), 7.40 (s, 1H), 7.32 (t, *J* = 7.2 Hz, 1H), 7.25 (t, *J* = 7.5 Hz, 2H), 7.23–7.14 (m, 4H), 7.10 (t, *J* = 8.5 Hz, 2H); <sup>13</sup>C{<sup>1</sup>H} NMR (126 MHz, CDCl<sub>3</sub>)

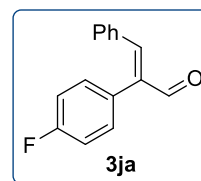

δ: 193.8, 163.8, 161.8, 150.8, 140.9, 133.9, 131.4 (d, *J* = 8.2 Hz), 130.8, 130.5, 129.1 (d, *J* = 2.7 Hz), 128.7, 116.1 (d, *J* = 21.2 Hz); <sup>19</sup>F{<sup>1</sup>H} NMR (471 MHz, CDCl<sub>3</sub>) δ: –113.07.

**(E)-2-(3-Fluorophenyl)-3-phenylacrylaldehyde, 3ka<sup>2b</sup>**

Purified by column chromatography (silica gel 100-200 mesh, ethyl acetate/hexane, v/v = 0.5/9.5); White solid (89 mg, 79%); mp: 131–133 °C; <sup>1</sup>H NMR (500 MHz, CDCl<sub>3</sub>) δ: 9.75 (s, 1H), 7.42 (s, 1H), 7.38 (dd, *J* = 14.4, 7.4 Hz, 1H), 7.32 (t, *J* = 7.1 Hz, 1H), 7.29–7.18 (m, 4H), 7.08 (t, *J* = 8.4 Hz, 1H), 6.98 (d, *J* = 7.5 Hz, 1H), 6.93 (d, *J* = 9.4 Hz, 1H); <sup>13</sup>C{<sup>1</sup>H} NMR (126 MHz, CDCl<sub>3</sub>) δ: 193.4, 163.1 (d, *J* = 247.0

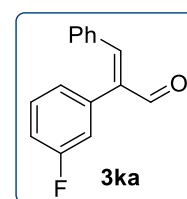

Hz), 150.9, 140.6, 135.6 (d, *J* = 8.2 Hz), 133.7, 130.9, 130.6 (d, *J* = 11.7 Hz), 128.8, 125.3 (d, *J* = 2.5 Hz), 116.6 (d, *J* = 21.8 Hz), 115.5 (d, *J* = 21.2 Hz); <sup>19</sup>F{<sup>1</sup>H} NMR (471 MHz, CDCl<sub>3</sub>) δ: –112.16.

**(E)-3-Phenyl-2-(4-(trifluoromethyl)phenyl)acrylaldehyde, 3la<sup>2b</sup>**

Purified by column chromatography (silica gel 100-200 mesh, ethyl acetate/hexane, v/v = 0.5/9.5); White solid (110 mg, 80%); mp: 125–127 °C; <sup>1</sup>H NMR (500 MHz, CDCl<sub>3</sub>) δ: 9.78 (s, 1H), 7.67 (d, *J* = 7.9 Hz, 2H), 7.47 (s, 1H), 7.34 (d, *J* = 7.8 Hz, 3H), 7.30–7.23 (m, 2H), 7.19 (d, *J* = 7.7 Hz, 2H); <sup>13</sup>C{<sup>1</sup>H} NMR (126 MHz, CDCl<sub>3</sub>) δ: 193.3, 151.3, 140.6, 137.3, 133.6, 130.8, 130.1, 128.9, 125.9 (d, *J* = 2.7 Hz); <sup>19</sup>F{<sup>1</sup>H} NMR (471 MHz, CDCl<sub>3</sub>) δ: –62.53.

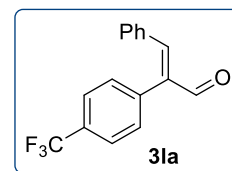

**(E)-2-(Naphthalen-1-yl)-3-phenylacrylaldehyde, 3ma<sup>2b</sup>**

Purified by column chromatography (silica gel 100-200 mesh, ethyl acetate/hexane, v/v = 0.5/9.5); White solid (98 mg, 76%); mp: 150–152 °C; <sup>1</sup>H NMR (600 MHz, CDCl<sub>3</sub>) δ: 9.86 (s, 1H), 7.84 (t, *J* = 8.5 Hz, 2H), 7.64 (s, 1H), 7.55 (d, *J* = 8.4 Hz, 1H), 7.48–7.44 (m, 1H), 7.41 (t, *J* = 7.5 Hz, 1H), 7.31 (t, *J* = 7.6 Hz, 1H), 7.21 (d, *J* = 7.0 Hz, 1H), 7.15 (t, *J* = 7.3 Hz, 1H), 7.04 (t, *J* = 7.8 Hz, 2H), 6.99 (d, *J* = 7.7 Hz, 2H); <sup>13</sup>C{<sup>1</sup>H} NMR (151 MHz, CDCl<sub>3</sub>) δ: 194.1, 151.3, 140.6, 133.9, 131.9, 131.3, 131.0, 130.6, 129.0, 128.8, 128.7, 127.2, 126.7, 126.3, 125.9, 125.0.

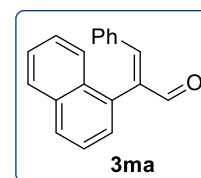

**(E)-3-(4-Fluorophenyl)-2-(o-tolyl)acrylaldehyde, 3cm**

Purified by column chromatography (silica gel 100-200 mesh, ethyl acetate/hexane, v/v = 0.7/9.3); White solid (100 mg, 84%); mp: 153–155 °C; **<sup>1</sup>H NMR** (500 MHz, CDCl<sub>3</sub>)  $\delta$ : 9.77 (s, 1H), 7.43 (s, 1H), 7.36–7.23 (m, 3H), 7.16–7.10 (m, 2H), 7.01 (d,  $J$  = 7.5 Hz, 1H), 6.92 (t,  $J$  = 8.3 Hz, 2H), 2.07 (s, 3H); **<sup>13</sup>C{<sup>1</sup>H} NMR** (151 MHz, CDCl<sub>3</sub>)  $\delta$ : 193.9, 163.8 (d,  $J$  = 253.6 Hz), 148.9, 141.5, 136.3, 133.2, 132.7 (d,  $J$  = 8.4 Hz), 130.8, 130.6 (d,  $J$  = 3.2 Hz), 129.2, 128.8, 126.8, 116.0 (d,  $J$  = 21.5 Hz), 19.6.; **<sup>19</sup>F{<sup>1</sup>H} NMR** (471 MHz, CDCl<sub>3</sub>)  $\delta$ : –108.25. **HRMS** (ESI-TOF)  $m/z$ : [M + H]<sup>+</sup> calcd. for C<sub>16</sub>H<sub>14</sub>FO 241.1023; Found 241.1021; **IR** (KBr, cm<sup>–1</sup>): 3068, 2928, 1685, 1600, 1235, 835.

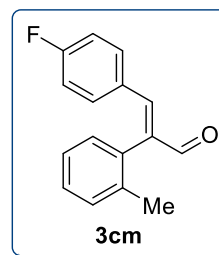

**(E)-2-(4-(Benzyloxy)phenyl)-3-(4-nitrophenyl)acrylaldehyde, 3gi**

Purified by column chromatography (silica gel 100-200 mesh, ethyl acetate/hexane, v/v = 0.7/9.3); Orange solid (161 mg, 90%); mp: 161–163 °C; **<sup>1</sup>H NMR** (600 MHz, CDCl<sub>3</sub>)  $\delta$ : 9.81 (s, 1H), 8.08 (d,  $J$  = 8.9 Hz, 2H), 7.44 (d,  $J$  = 7.2 Hz, 2H), 7.42–7.33 (m, 6H), 7.10 (d,  $J$  = 8.7 Hz, 2H), 7.01 (d,  $J$  = 8.7 Hz, 2H), 5.09 (s, 2H); **<sup>13</sup>C{<sup>1</sup>H} NMR** (151 MHz, CDCl<sub>3</sub>)  $\delta$ : 193.6, 159.4, 147.9, 145.7, 144.1, 140.8, 136.7, 131.1, 130.8, 128.7, 128.2, 127.7, 124.3, 123.7, 115.6, 70.2. **HRMS** (ESI-TOF)  $m/z$ : [M + H]<sup>+</sup> calcd. for C<sub>22</sub>H<sub>18</sub>NO<sub>4</sub> 360.1230; Found 360.1240; **IR** (KBr, cm<sup>–1</sup>): 3037, 2858, 1676, 1593, 1341, 829.

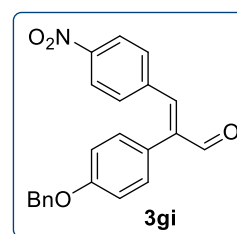

**(E)-2-(3-Methoxyphenyl)-3-(4-nitrophenyl)acrylaldehyde, 3ei**

Purified by column chromatography (silica gel 100-200 mesh, ethyl acetate/hexane, v/v = 0.7/9.3); Orange solid (120 mg, 85%); mp: 165–167 °C; **<sup>1</sup>H NMR** (600 MHz, CDCl<sub>3</sub>)  $\delta$ : 9.82 (s, 1H), 8.09 (d,  $J$  = 8.8 Hz, 2H), 7.43 (s, 1H), 7.41–7.31 (m, 3H), 6.96 (dd,  $J$  = 8.3, 2.2 Hz, 1H), 6.72 (dd,  $J$  = 12.8, 4.7 Hz, 2H), 3.78 (s, 3H); **<sup>13</sup>C{<sup>1</sup>H} NMR** (151 MHz, CDCl<sub>3</sub>)  $\delta$ : 193.1, 160.2, 148.1, 145.9, 144.5, 140.4, 133.7, 131.3, 130.5, 123.7, 121.4, 114.9, 114.5, 55.4. **HRMS** (ESI-TOF)  $m/z$ : [M + H]<sup>+</sup> calcd. for C<sub>16</sub>H<sub>14</sub>NO<sub>4</sub> 284.0917; Found 284.0923; **IR** (KBr, cm<sup>–1</sup>): 3042, 2843, 1682, 1596, 1577, 1437, 1343, 847.

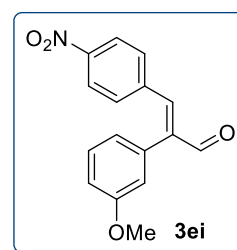

**(E)-2-(4-Fluorophenyl)-3-(4-nitrophenyl)acrylaldehyde, 3ji**

Purified by column chromatography (silica gel 100-200 mesh, ethyl acetate/hexane, v/v = 0.7/9.3); Yellow solid (116 mg, 86%); mp: 140–142 °C; **<sup>1</sup>H NMR** (500 MHz, CDCl<sub>3</sub>)  $\delta$ : 9.83 (s, 1H), 8.11 (d,  $J$  = 7.8 Hz, 2H), 7.45 (s, 1H), 7.36 (d,  $J$  = 7.8 Hz, 2H), 7.19–7.09 (m, 4H); **<sup>13</sup>C{<sup>1</sup>H} NMR** (126 MHz, CDCl<sub>3</sub>)  $\delta$ : 193.1, 163.2 (d,  $J$  = 249.8 Hz), 148.1, 146.6, 143.6, 140.2, 131.4 (d,  $J$

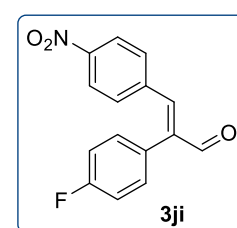

= 8.2 Hz), 131.1, 127.9 (d,  $J = 3.2$  Hz), 123.9, 116.4 (d,  $J = 21.7$  Hz);  $^{19}\text{F}\{^1\text{H}\}$  NMR (471 MHz,  $\text{CDCl}_3$ )  $\delta$ : -111.51. **HRMS** (ESI-TOF)  $m/z$ :  $[\text{M} + \text{H}]^+$  calcd. for  $\text{C}_{15}\text{H}_{11}\text{FNO}_3$  272.0717; Found 272.0722; **IR** (KBr,  $\text{cm}^{-1}$ ): 3063, 2850, 1668, 1594, 1343, 830.

**(E)-3-(4-Fluorophenyl)-2-(4-(trifluoromethyl)phenyl)acrylaldehyde, 3lm**

Purified by column chromatography (silica gel 100-200 mesh, ethyl acetate/hexane, v/v = 0.7/9.3); Yellow solid (104 mg, 71%); mp: 158–160 °C;  $^1\text{H}$  NMR (500 MHz,  $\text{CDCl}_3$ )  $\delta$ : 9.78 (s, 1H), 7.69 (d,  $J = 7.8$  Hz, 2H), 7.43 (s, 1H), 7.32 (d,  $J = 7.8$  Hz, 2H), 7.24 (s, 1H), 7.04 (t,  $J = 8.1$  Hz, 1H), 6.98 (d,  $J = 7.7$  Hz, 1H), 6.86 (d,  $J = 9.9$  Hz, 1H);  $^{13}\text{C}\{^1\text{H}\}$  NMR (151 MHz,  $\text{CDCl}_3$ )  $\delta$ : 193.0, 162.6 (d,  $J = 247.8$  Hz), 149.4, 141.5, 136.7, 135.6 (d,  $J = 8.1$  Hz), 130.5 (d,  $J = 8.3$  Hz), 130.0, 126.6 (d,  $J = 2.6$  Hz), 126.0 (q,  $J = 7.0$  Hz), 117.7 (d,  $J = 20.9$  Hz), 117.1 (d,  $J = 22.3$  Hz);  $^{19}\text{F}\{^1\text{H}\}$  NMR (471 MHz,  $\text{CDCl}_3$ )  $\delta$ : -62.59, -111.58. **HRMS** (ESI-TOF)  $m/z$ :  $[\text{M} + \text{H}]^+$  calcd. for  $\text{C}_{16}\text{H}_{11}\text{F}_4\text{O}$  295.0741; Found 295.0748; **IR** (KBr,  $\text{cm}^{-1}$ ): 2957, 2850, 1682, 1323, 1129, 798.

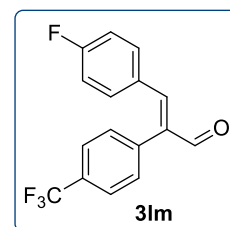

**(E)-3-(4-Chlorophenyl)-2-(4-methoxyphenyl)acrylaldehyde, 3dk**

Purified by column chromatography (silica gel 100-200 mesh, ethyl acetate/hexane, v/v = 0.7/9.3); Yellow solid (121 mg, 89%); mp: 167–169 °C;  $^1\text{H}$  NMR (600 MHz,  $\text{CDCl}_3$ )  $\delta$ : 9.75 (s, 1H), 7.29 (s, 1H), 7.22 (d,  $J = 7.8$  Hz, 2H), 7.17 (d,  $J = 7.6$  Hz, 2H), 7.11 (d,  $J = 7.3$  Hz, 2H), 6.94 (d,  $J = 7.3$  Hz, 2H), 3.84 (s, 3H);  $^{13}\text{C}\{^1\text{H}\}$  NMR (151 MHz,  $\text{CDCl}_3$ )  $\delta$ : 194.0, 159.8, 148.1, 141.7, 136.0, 132.7, 131.8, 130.6, 128.8, 124.8, 114.5, 55.3. **HRMS** (ESI-TOF)  $m/z$ :  $[\text{M} + \text{H}]^+$  calcd. for  $\text{C}_{16}\text{H}_{14}\text{ClO}_2$  273.0677; Found 273.0671; **IR** (KBr,  $\text{cm}^{-1}$ ): 3003, 2836, 1685, 1596, 1460, 825, 755.

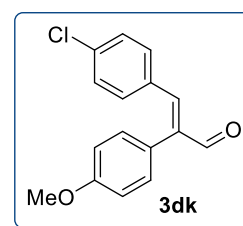

**(E)-3-(4-Chlorophenyl)-2-(2-methoxyphenyl)acrylaldehyde, 3fk**

Purified by column chromatography (silica gel 100-200 mesh, ethyl acetate/hexane, v/v = 0.7/9.3); Yellow solid (119 mg, 88%); mp: 165–167 °C;  $^1\text{H}$  NMR (600 MHz,  $\text{CDCl}_3$ )  $\delta$ : 9.73 (s, 1H), 7.41 (s, 1H), 7.40–7.37 (m, 1H), 7.22–7.18 (m, 2H), 7.14 (d,  $J = 8.6$  Hz, 2H), 7.04–6.97 (m, 3H), 3.69 (s, 3H);  $^{13}\text{C}\{^1\text{H}\}$  NMR (151 MHz,  $\text{CDCl}_3$ )  $\delta$ : 193.6, 157.1, 147.9, 139.4, 136.2, 133.2, 131.6, 130.7, 130.4, 128.9, 122.6, 121.4, 111.6, 55.7. **HRMS** (ESI-TOF)  $m/z$ :  $[\text{M} + \text{H}]^+$  calcd. for  $\text{C}_{16}\text{H}_{14}\text{ClO}_2$  273.0677; Found 273.0675; **IR** (KBr,  $\text{cm}^{-1}$ ): 3024, 2834, 1671, 1605, 805, 768.

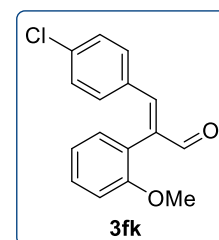

**5.4 Synthesis of 4-methyl-N-(2-phenyl-1H-inden-1-yl)benzenesulfonamide, 5<sup>3</sup>**

To a stirred solution of acrylaldehyde **3aa** (104 mg, 0.50 mmol, 0.50 equiv.) in toluene (3 mL) were added *p*-toluenesulfonamide (102 mg, 0.60 mmol, 1.20 equiv.) and FeCl<sub>3</sub> (33 mg, 20 mol %). The resulting mixture was stirred at 60 °C for 8 h. After completion of the reaction as monitored by TLC, the reaction mixture was quenched with H<sub>2</sub>O and then extracted with EtOAc (3 x 10 mL). The organic layer was washed with brine, dried over anhydrous Na<sub>2</sub>SO<sub>4</sub> concentrated in *vacuo* and then purified by column chromatography over silica gel (EtOAc:hexane, 1.5:8.5) to afford the indenamine derivative **5** (153 mg, 85%) as a white solid. mp: 144–147 °C; <sup>1</sup>H NMR (500 MHz, CDCl<sub>3</sub>) δ: 7.80 (d, *J* = 8.2 Hz, 2H), 7.30 (dd, *J* = 15.4, 7.5 Hz, 4H), 7.24–7.16 (m, 6H), 7.09–7.06 (m, 1H), 6.97 (s, 1H), 5.42 (d, *J* = 9.1 Hz, 1H), 4.51 (d, *J* = 9.2 Hz, 1H), 2.49 (s, 3H); <sup>13</sup>C{<sup>1</sup>H} NMR (126 MHz, CDCl<sub>3</sub>) δ: 146.4, 144.3, 143.8, 142.3, 138.6, 133.4, 129.9, 128.8, 128.7, 128.6, 127.9, 127.6, 127.0, 126.4, 124.8, 121.5, 59.7, 21.7.

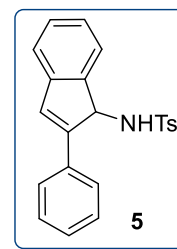

### 5.5 Synthesis of 1,2-diphenyl-5,6-dihydropyrrolo[2,1-a]isoquinoline, **6**<sup>4</sup>

To a stirred solution of acrylaldehyde **3aa** (104 mg, 0.50 mmol, 0.50 equiv.) in toluene (3 mL) were added 1,2,3,4-tetrahydroisoquinoline (133 mg, 1.0 mmol, 2.0 equiv.) and TfOH (75 mg, 0.50 mmol, 1.0 equiv.). The resulting mixture was stirred at 130 °C for 5 h. After completion of the reaction as monitored by TLC, the reaction mixture was concentrated in *vacuo* and then purified by column chromatography over silica gel (EtOAc:hexane, 0.2:9.8) to afford the isoquinolines: derivative **6** (138 mg, 86%) as a white solid. mp: 50–52 °C; <sup>1</sup>H NMR (500 MHz, CDCl<sub>3</sub>) δ: 7.32–7.26 (m, 5H), 7.15 (t, *J* = 6.8 Hz, 3H), 7.11–7.14 (m, 3H), 7.01 (t, *J* = 7.3 Hz, 1H), 6.96 (d, *J* = 7.6 Hz, 1H), 6.92 (d, *J* = 7.4 Hz, 1H), 6.86 (s, 1H), 4.09 (t, *J* = 6.4 Hz, 2H), 3.10 (t, *J* = 6.5 Hz, 2H); <sup>13</sup>C{<sup>1</sup>H} NMR (126 MHz, CDCl<sub>3</sub>) δ: 136.7, 135.7, 131.9, 131.1, 129.7, 128.7, 128.2, 128.1, 128.0, 126.8, 126.3, 125.6, 125.5, 124.8, 124.2, 120.5, 119.1, 44.7, 30.2.

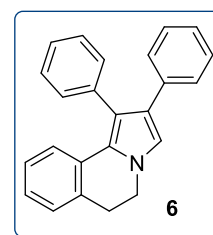

### 5.6 Synthesis of ((2*S*,3*S*)-2,3-diphenyloxiran-2-yl)methanol, **7**<sup>5</sup>

To a stirred solution of acrylaldehyde **3aa** (208 mg, 1.0 mmol, 1.0 equiv.) in CHCl<sub>3</sub> (10 mL) at 4 °C was added (*R*)- $\alpha,\alpha$ -diphenylprolinol trimethylsilyl ether (65 mg, 0.20 mmol, 20 mol%), followed by 35% aq. H<sub>2</sub>O<sub>2</sub> (0.15 mL, 1.50 mmol, 1.50 equiv.) addition and the reaction mixture was stirred for 16 h. After completion of the reaction as monitored by TLC, the reaction mixture was quenched with water and then extracted with DCM (3 x 10 mL). The organic layer was washed with brine, dried over Na<sub>2</sub>SO<sub>4</sub> (anhyd.), concentrated in *vacuo* for the next step without further purification.

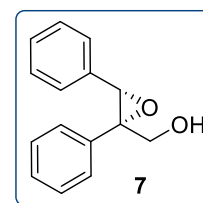

To a stirred solution of above synthesized crude product in MeOH at 0 °C was added NaBH<sub>4</sub> (19.0 mg, 0.50 mmol, 0.5 equiv.) and the reaction mixture was stirred for 0.5 h. After completion of the

reaction as monitored by TLC, the reaction mixture was quenched with aq. saturated  $\text{NH}_4\text{Cl}$  and then extracted with DCM (3 x 10 mL). The organic layer was washed with brine, dried over anhydrous  $\text{Na}_2\text{SO}_4$ , concentrated in *vacuo* and then purified by column chromatography over silica gel (EtOAc:hexane, 1.0:9.0) to afford the epoxy alcohol **7** (189 mg, 84%) with  $\geq 97\%$  ee as a colourless oil.  $[\alpha]_{\text{D}}^{25} -49.4$  (*c* 2.4,  $\text{CHCl}_3$ ); [lit.<sup>6</sup>  $[\alpha]_{\text{D}}^{25} -49.6$  (*c* 2.4,  $\text{CHCl}_3$ );  $^1\text{H NMR}$  (500 MHz,  $\text{CDCl}_3$ )  $\delta$ : 7.20 (s, 5H), 7.13–7.09 (m, 3H), 7.04–7.02 (m, 3H), 4.51 (s, 1H), 4.04 (s, 2H), 2.02 (s, 1H);  $^{13}\text{C}\{^1\text{H}\}$  NMR (126 MHz,  $\text{CDCl}_3$ )  $\delta$ : 134.9, 134.5, 128.2, 128.02, 127.9, 127.8, 127.7, 126.7, 69.2, 65.1, 60.9.

The enantiomeric purity was determined by HPLC analysis (chiral column-Chiralcel AD-H, 4.6 x 250 mm; 25 °C; mobile phase hexane/EtOH, 8.5:1.5; flow rate 1 mL/min; PDA detection at 225 nm): minor (2*R*, 3*R*) enantiomer: *t*R = 10.24 min, major (2*S*, 3*S*) enantiomer: *t*R = 11.52 min.

### 5.7 Synthesis of 4-nitro-2,3-diphenylbutanal, **8**<sup>7</sup>

To a stirred solution of acrylaldehyde **3aa** (208 mg, 1.0 mmol, 1.0 equiv.) in MeOH (5 mL) was added (*R*)-diphenylprolinol silyl ether (65 mg, 0.20 mmol, 20 mol%), PhCOOH (12.2 mg, 0.10 mmol, 10 mol%) and nitromethane (0.16 mL, 3.0 mmol, 3.0 equiv.) at the room temperature, and the reaction mixture was stirred for 24 h. After completion of the reaction as monitored by TLC, the reaction mixture was quenched with saturated aqueous  $\text{NaHCO}_3$  and then extracted with EtOAc (3 x 10 mL). The organic layer was washed with brine, dried over anhydrous  $\text{Na}_2\text{SO}_4$  and concentrated under reduced pressure.  $^1\text{H NMR}$  of the crude mixture showed a dr (*anti*:*syn*) = 87:13 and the chiral HPLC showed er (*anti*) = 86:14. After column chromatography (EtOAc:hexane, 0.5:9.5), the major (*anti*: determined by comparison with known literature data<sup>7</sup>) isomer of Michael product **8** was isolated as a white solid (71%, 190 mg).  $^1\text{H NMR}$  (600 MHz,  $\text{CDCl}_3$ )  $\delta$ : 9.55 (s, 1H), 7.44 (t, *J* = 7.0 Hz, 2H), 7.41–7.38 (m, 1H), 7.34 (t, *J* = 6.9 Hz, 2H), 7.31–7.25 (m, 5H), 4.49 (t, *J* = 11.5 Hz, 1H), 4.40 (d, *J* = 14.5 Hz, 1H), 4.31 (t, *J* = 10.3 Hz, 1H), 4.07 (d, *J* = 10.5 Hz, 1H);  $^{13}\text{C}\{^1\text{H}\}$  NMR (151 MHz,  $\text{CDCl}_3$ )  $\delta$ : 196.9, 137.2, 132.5, 129.9, 129.5, 129.2, 129.1, 128.3, 128.2, 78.5, 61.8, 44.5.

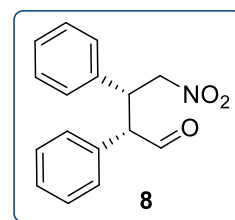

The enantiomeric purity was determined by HPLC analysis of the corresponding alcohol (chiral column-Chiralcel AD-H, 4.6 x 250 mm; 25 °C; mobile phase hexane/EtOH, 9.0:1.0; flow rate 1 mL/min; PDA detection at 220 nm): minor enantiomer: *t*R = 12.58 min, major enantiomer: *t*R = 27.59 min.

## 6. References:

1. J. Qu, Z. Yan, X. Wang, J. Deng, F. Liu and Z. -Q. Rong, *Chem. Commun.*, 2022, **58**, 9214.
2. (a) Q. Zeng, F. Gao, J. Benet-Buchholz and A. W. Kleij, *ACS Catal.*, 2023, **13**, 7514; (b) S. Yuan, G. Gao, L. Wang, C. Liu, L. Wan, H. Huang, H. Geng and M. Chang, *Nat. Commun.*, 2020, **11**, 621; (c) X. -L. Zhang, G. -F. Pan, X. -Q. Zhu, Y. -R. Y. -R. Guo, Gao and Y. -Q. Wang, *Org.*

- Lett.*, 2019, **21**, 2731; (d) Y. Wang, Z. Shao, K. Zhang and Q. Liu, *Angew. Chem. Int. Ed.*, 2018, **57**, 15143; (e) P. Gandeepan, P. Rajamalli and C. -H. Cheng, *ACS Catal.*, 2014, **4**, 4485; (f) W. Zhang, F. Ning, L. Varadi, D. E. Hibbs, J. A. Platts, M. Nyerges, R. J. Anderson and P. W. Groundwater, *Tetrahedron.*, 2014, **70**, 3621; (g) P. Wang, H. Rao, F. Zhou, R. Hua, C. -J. Li, *J. Am. Chem. Soc.*, 2012, **134**, 16468.
3. X. Fan, H. Lv, Y. -G. Guan, X. -M. Cui and K. Guo, *Chem. Commun.*, 2014, **50**, 4119.
  4. G. -Q. Hou, W. Zhao, C. Deng, C. Dong, C. W. L. Liu and J. Li, *ACS Omega*, 2022, **7**, 37050.
  5. W. Zhang, A. Basak, Y. Kosugi, Y. Hoshino and H. Yamamoto, *Angew. Chem. Int. Ed.*, 2005, **44**, 4389.
  6. Y. Gao, R. M. Hanson, J. M. Klunder, S. Y. Ko, H. Masamune and K. B. Sharpless, *J. Am. Chem. Soc.*, 1987, **109**, 5765.
  7. N. Mase, K. Watanabe, H. Yoda, K. Takabe, F. Tanaka and C. F. Barbas, *J. Am. Chem. Soc.*, 2006, **128**, 4966.

$^1\text{H}$  NMR (500 MHz,  $\text{CDCl}_3$ ) and  $^{13}\text{C}\{^1\text{H}\}$  NMR (126 MHz,  $\text{CDCl}_3$ ), **3aa**

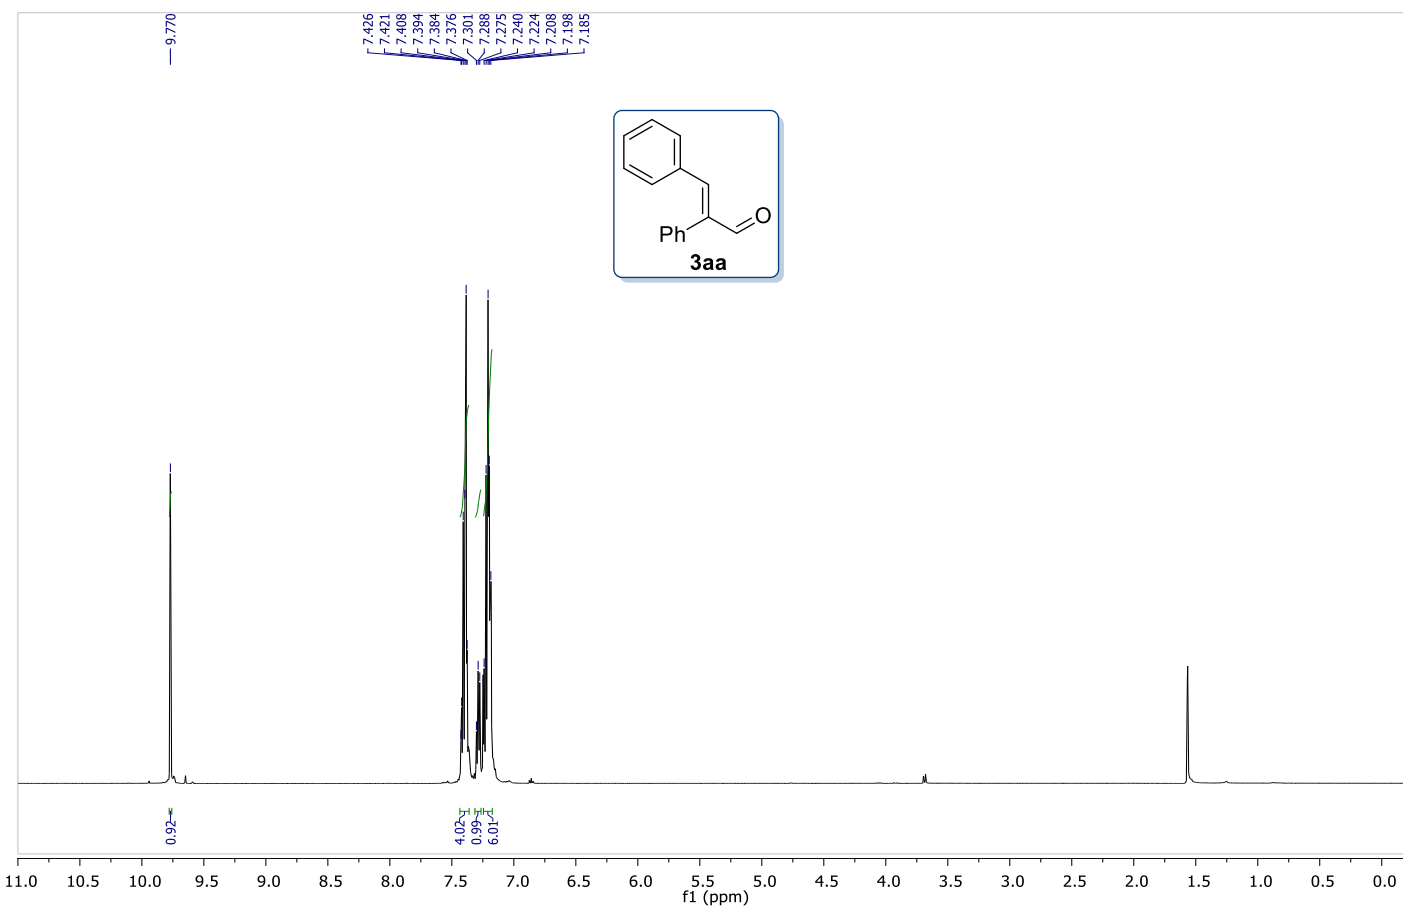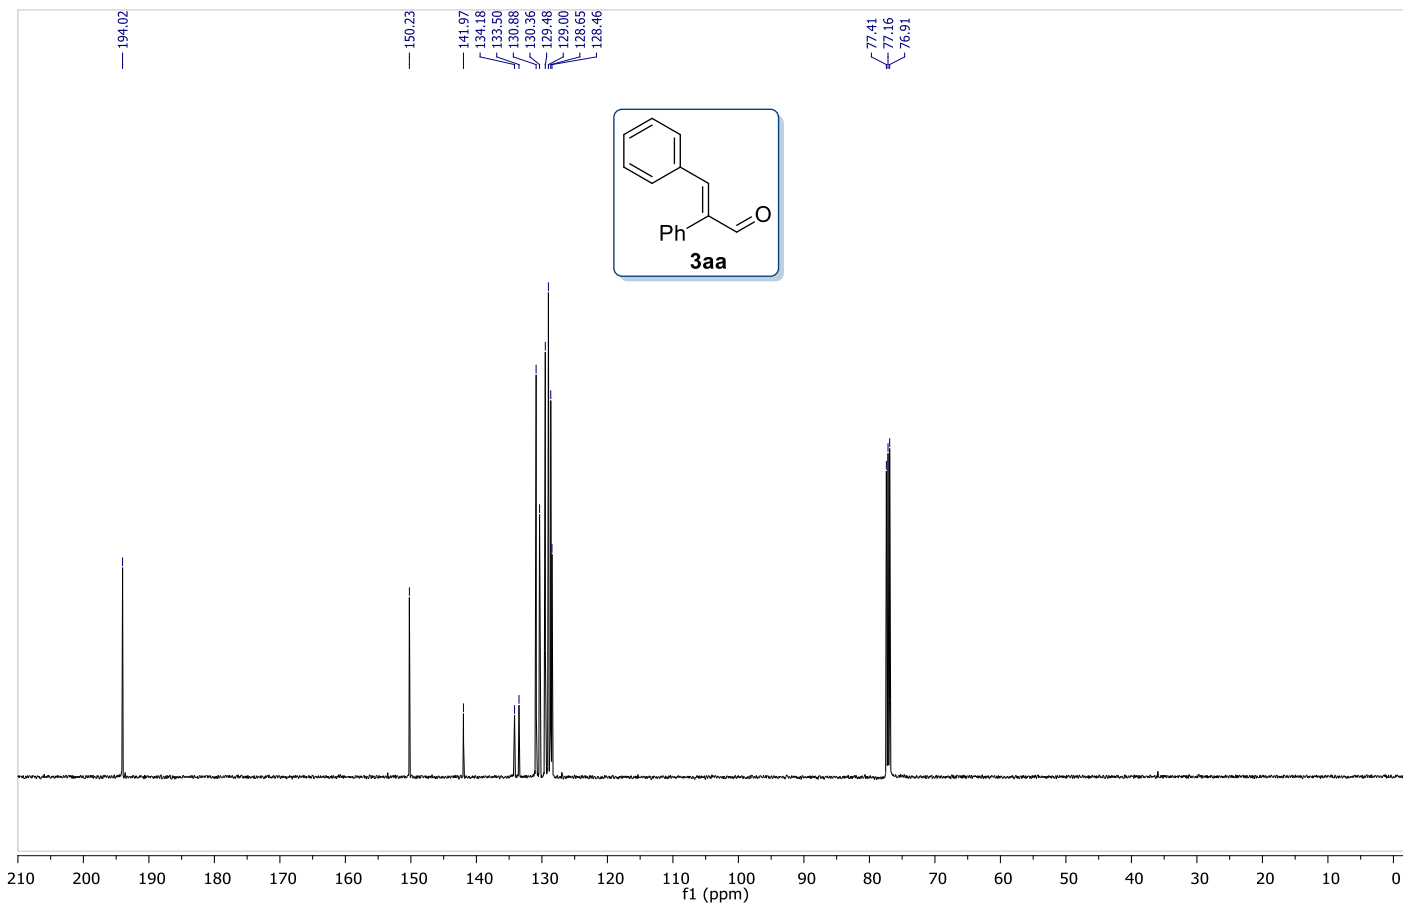

$^1\text{H}$  NMR (500 MHz,  $\text{CDCl}_3$ ) and  $^{13}\text{C}\{^1\text{H}\}$  NMR (126 MHz,  $\text{CDCl}_3$ ), **3ab**

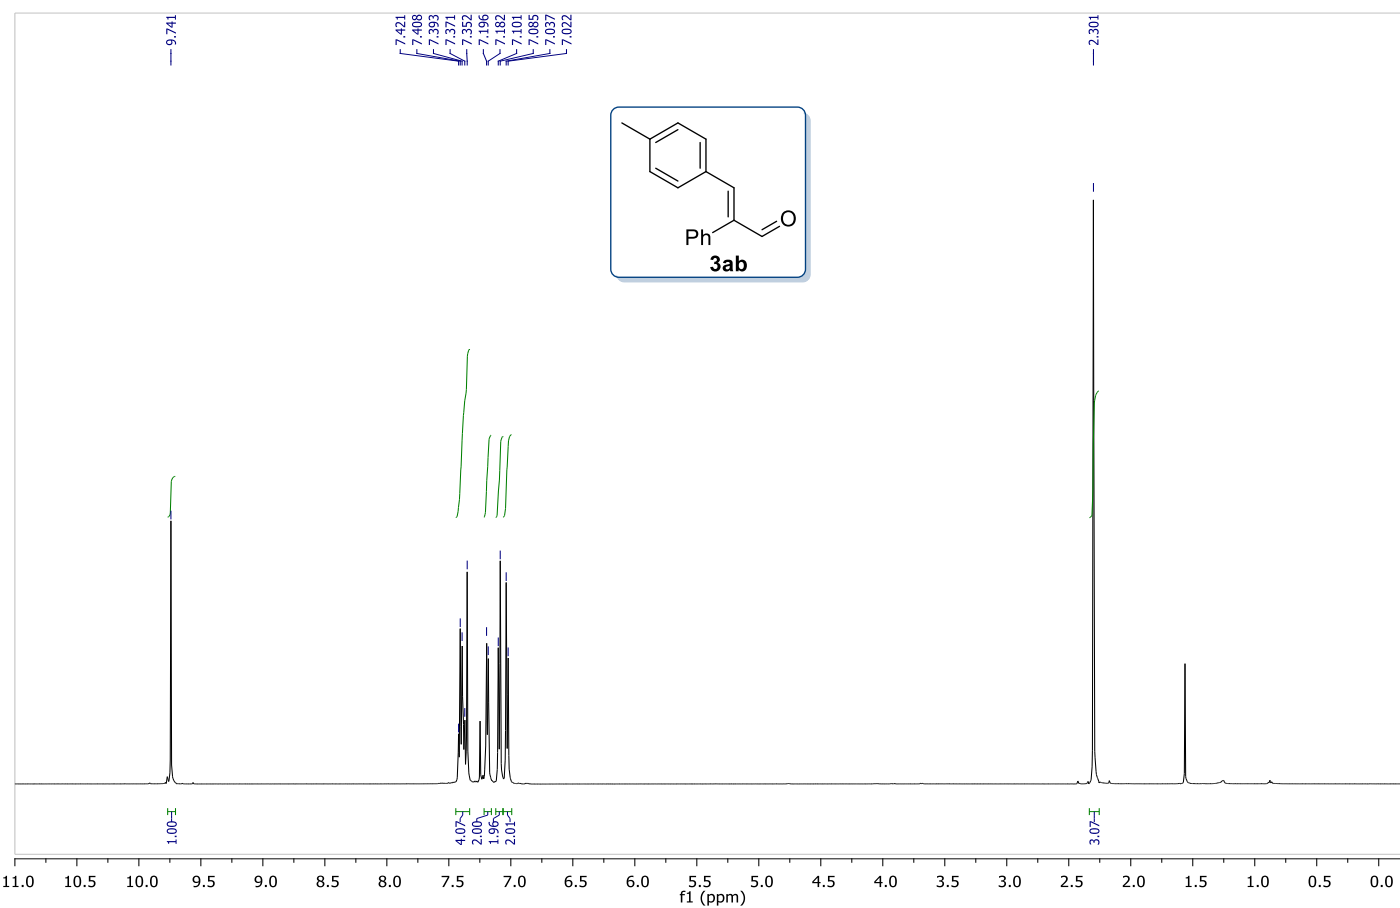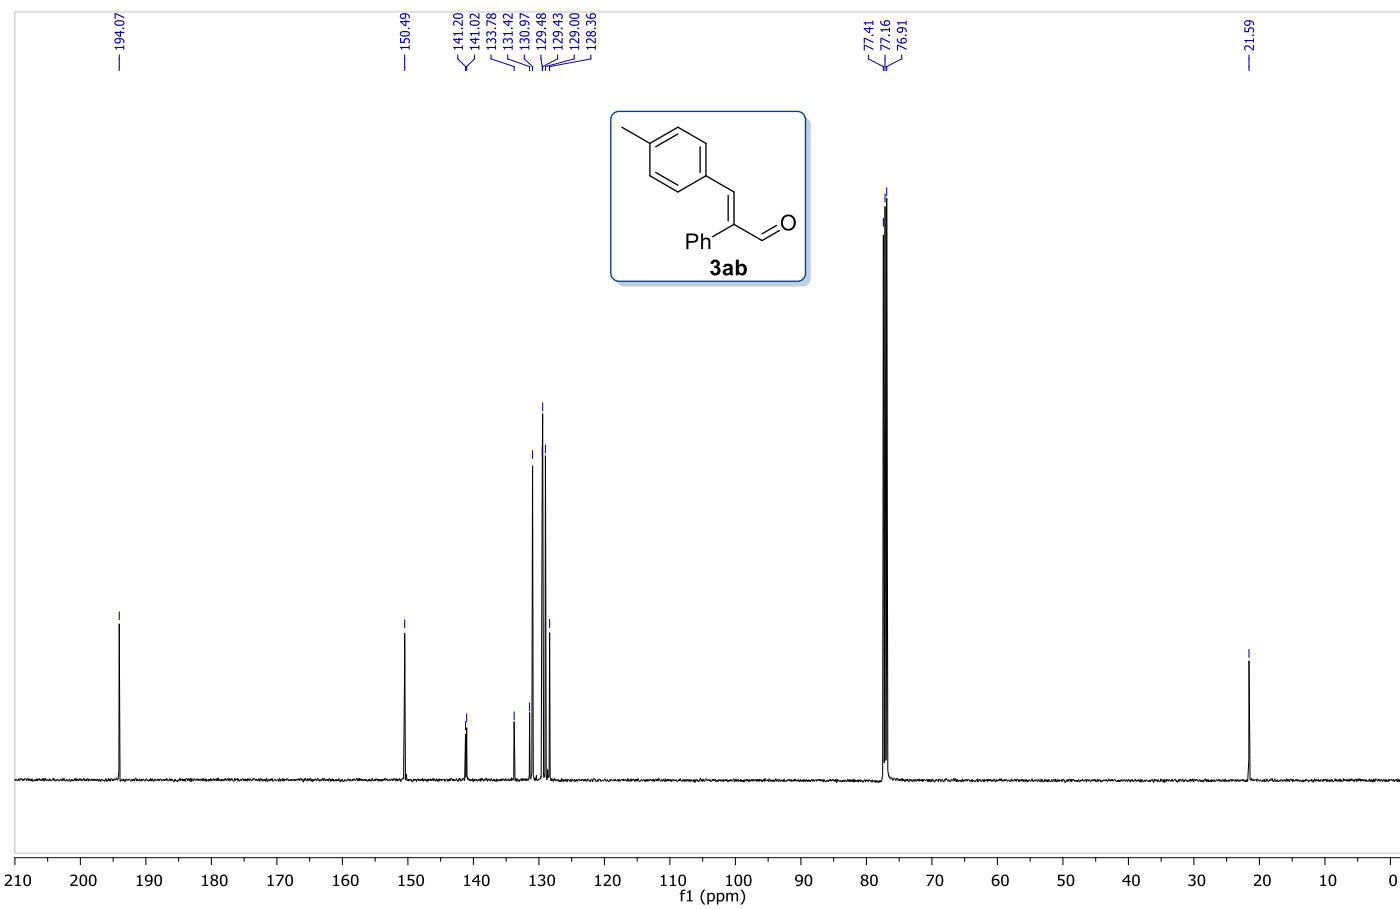

$^1\text{H}$  NMR (500 MHz,  $\text{CDCl}_3$ ) and  $^{13}\text{C}\{^1\text{H}\}$  NMR (126 MHz,  $\text{CDCl}_3$ ), **3ac**

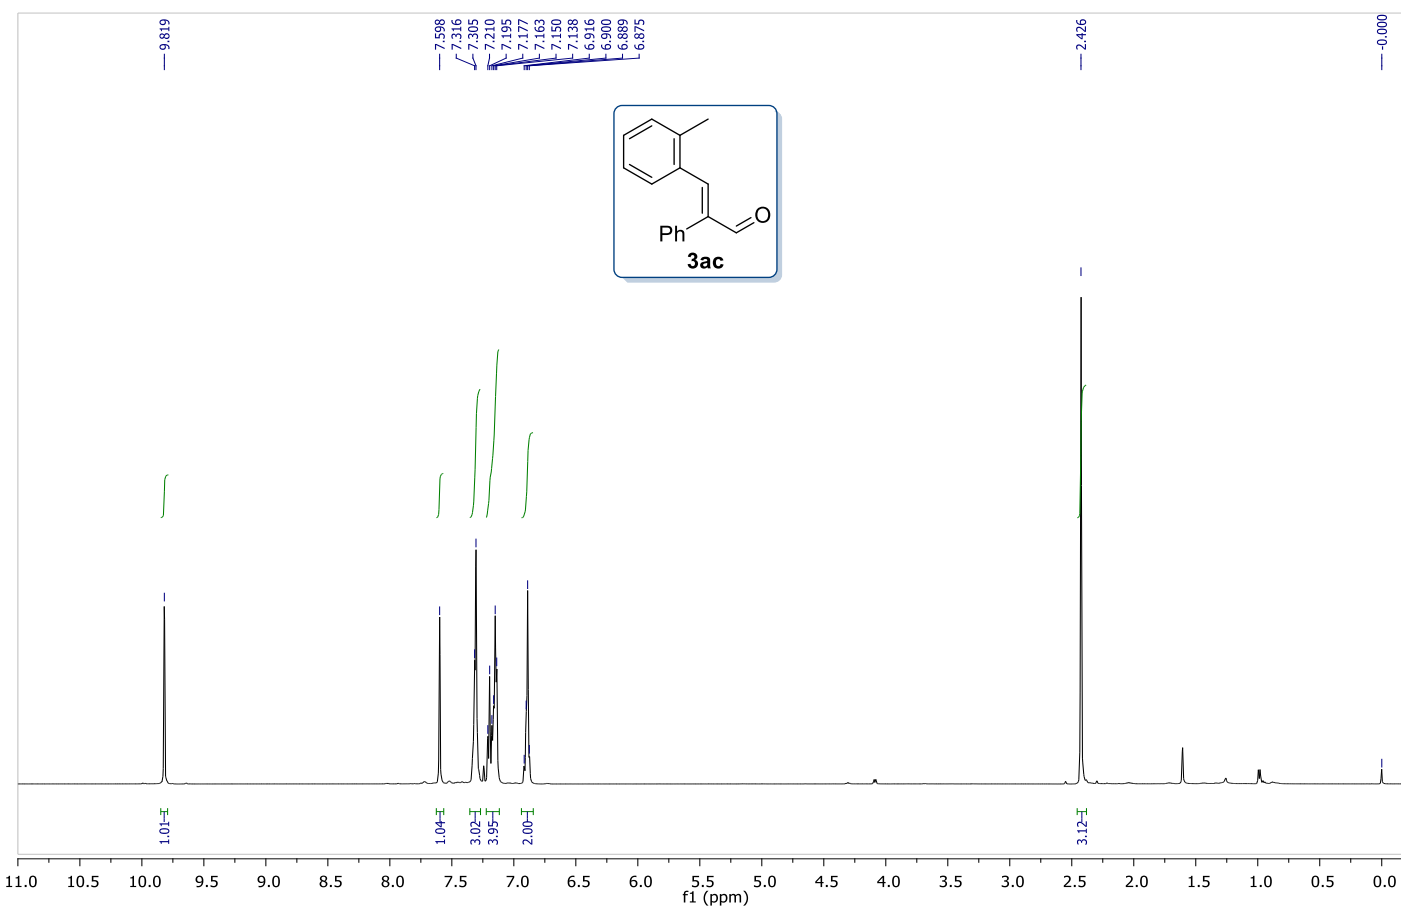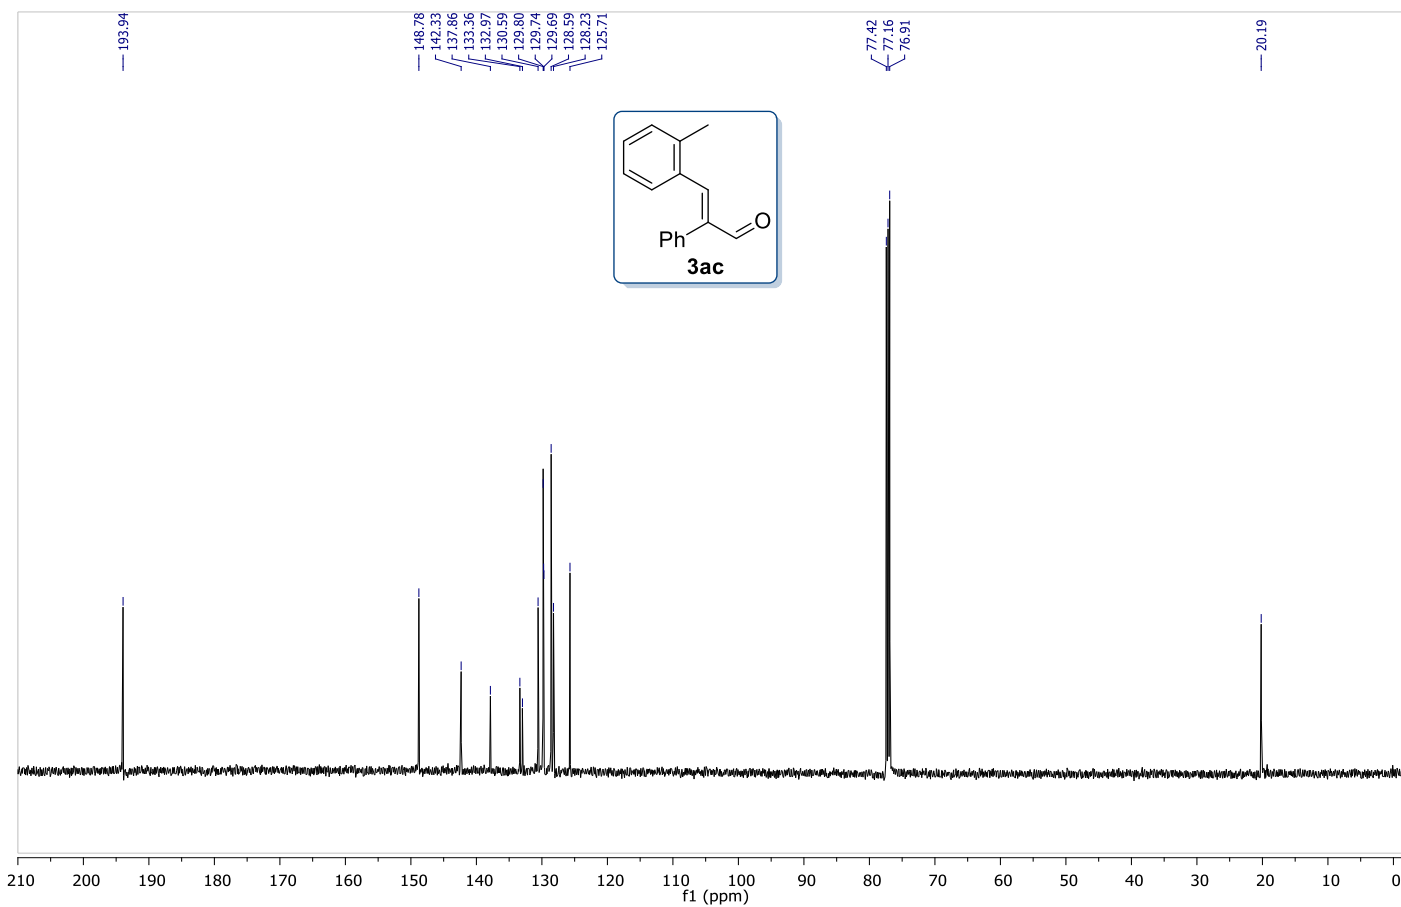

$^1\text{H}$  NMR (500 MHz,  $\text{CDCl}_3$ ) and  $^{13}\text{C}\{^1\text{H}\}$  NMR (126 MHz,  $\text{CDCl}_3$ ), **3ad**

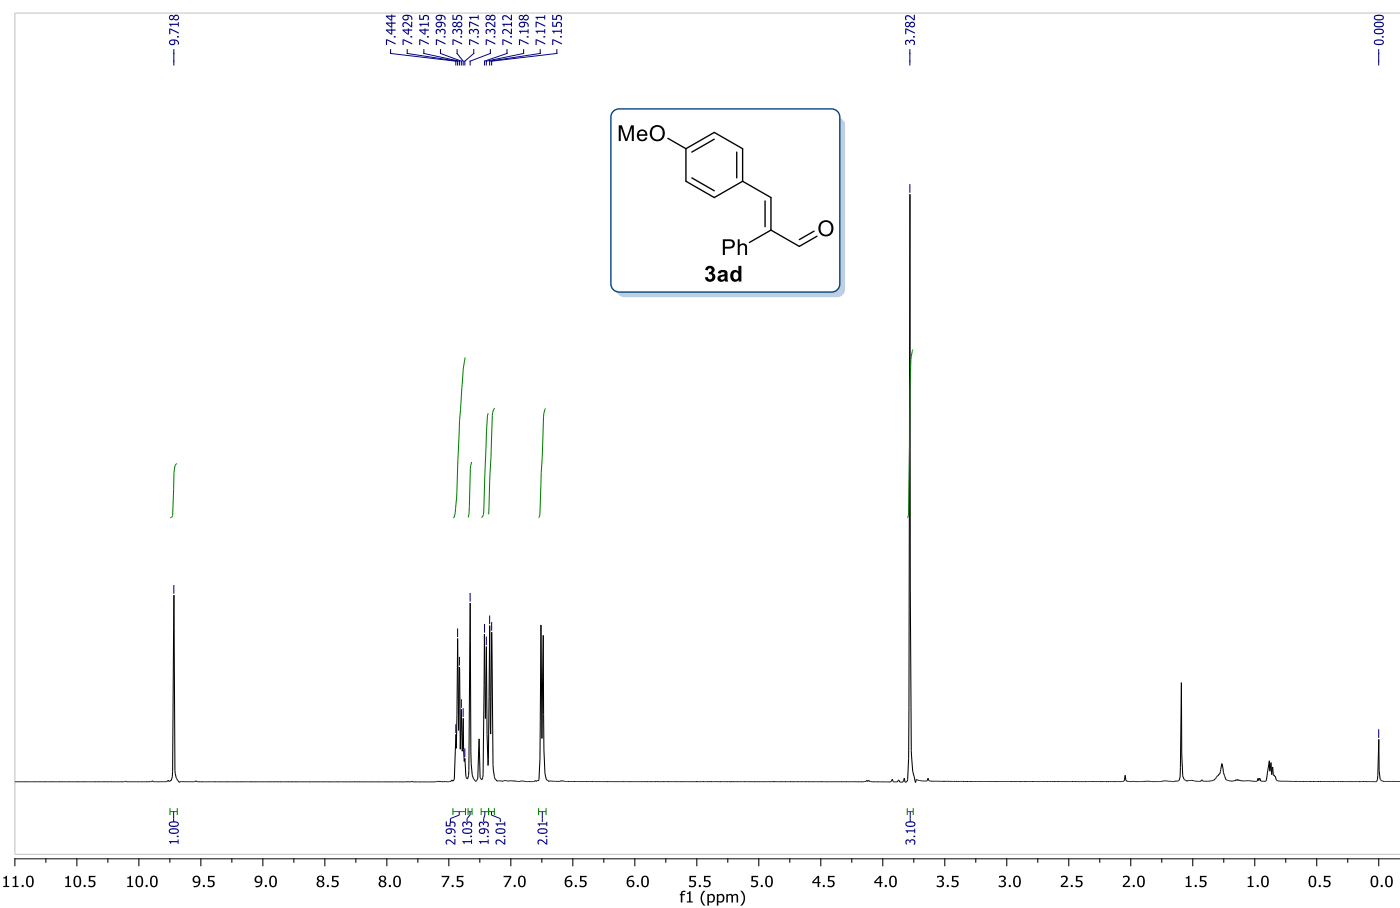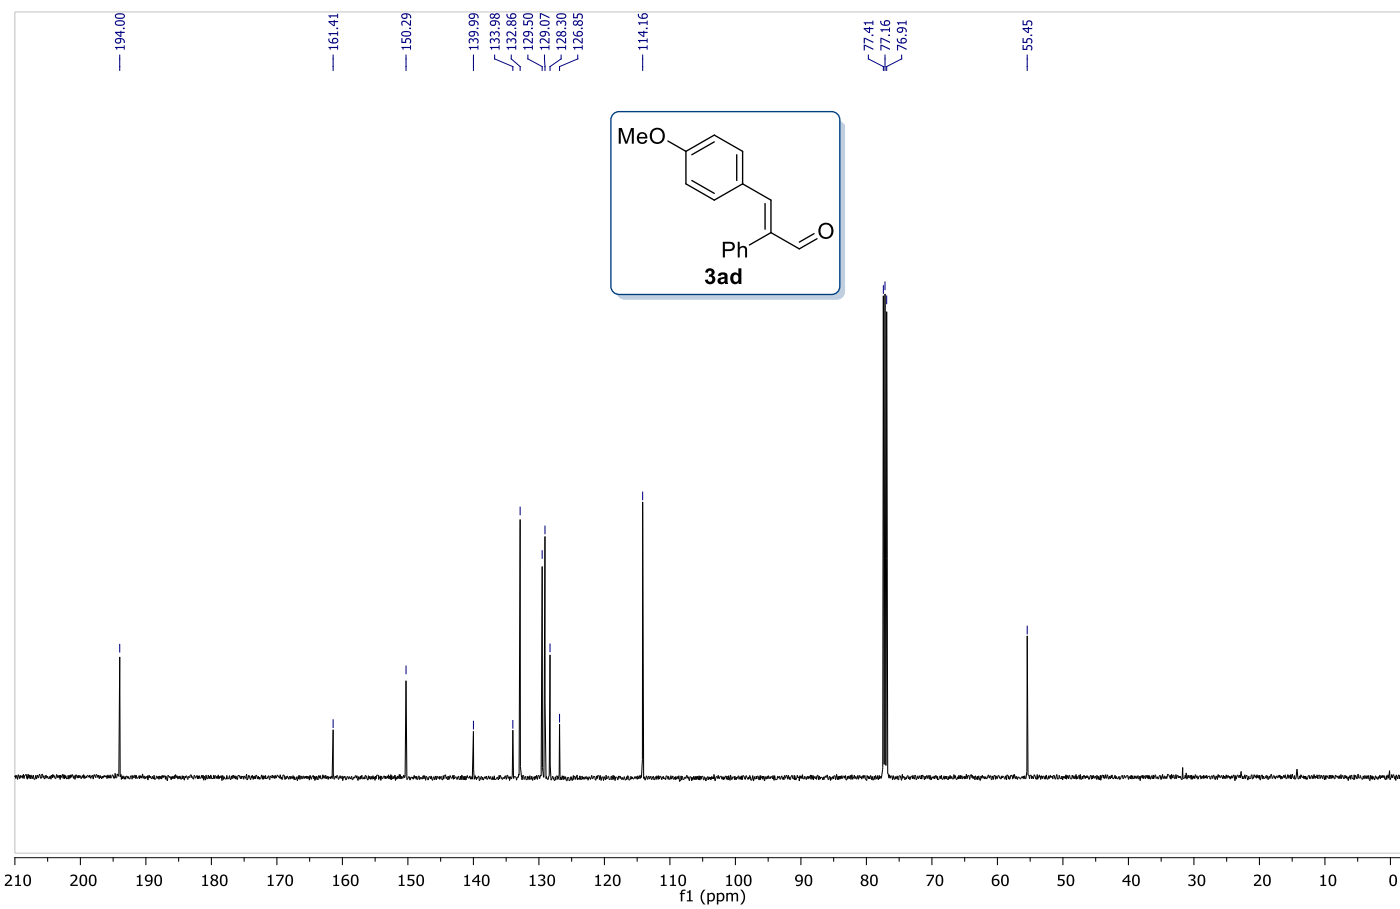

$^1\text{H}$  NMR (500 MHz,  $\text{CDCl}_3$ ) and  $^{13}\text{C}\{^1\text{H}\}$  NMR (126 MHz,  $\text{CDCl}_3$ ), **3ae**

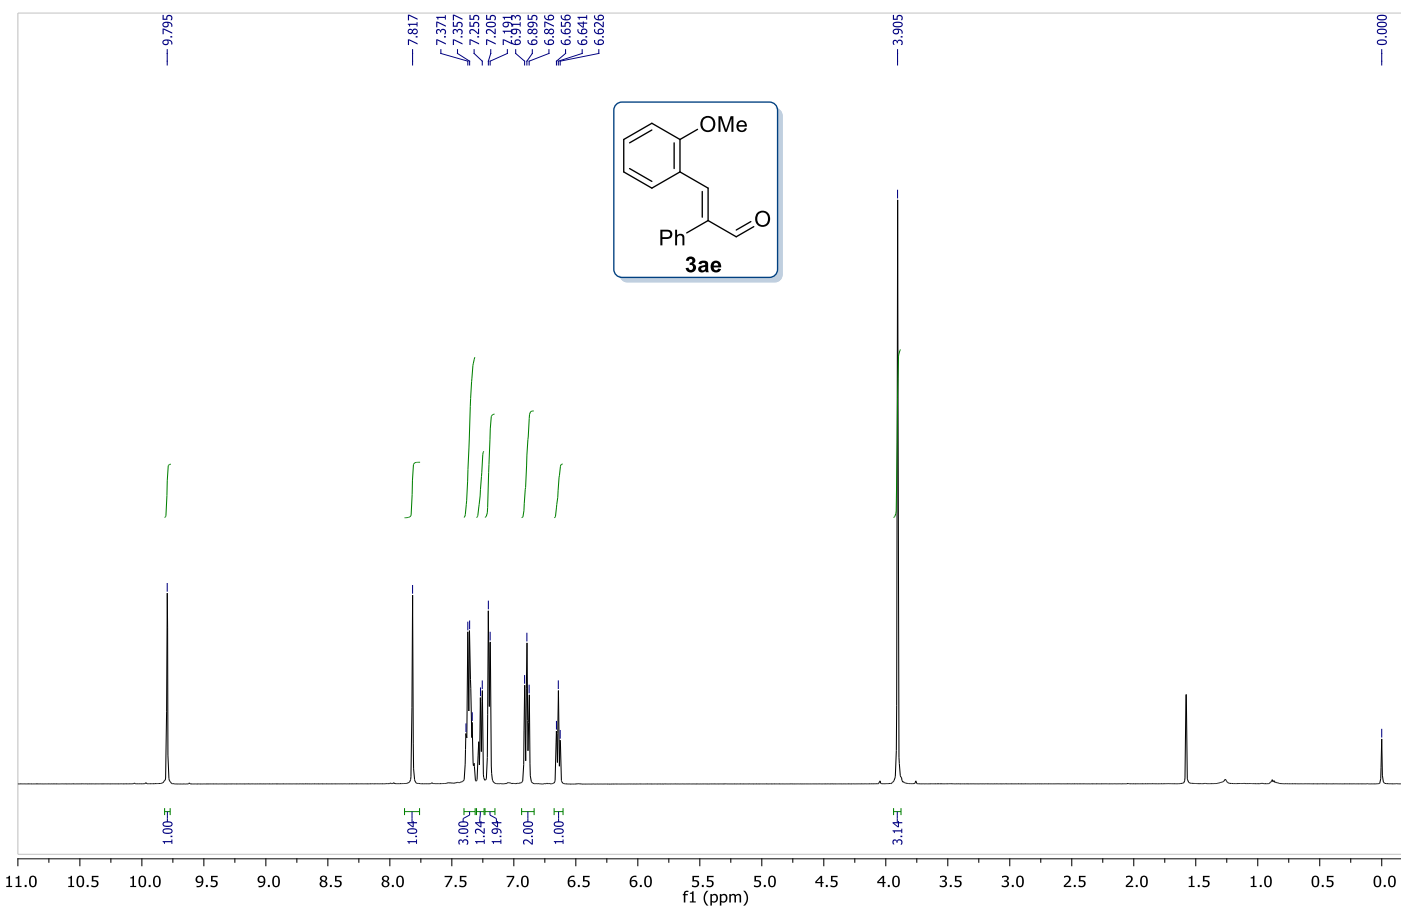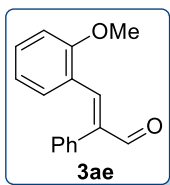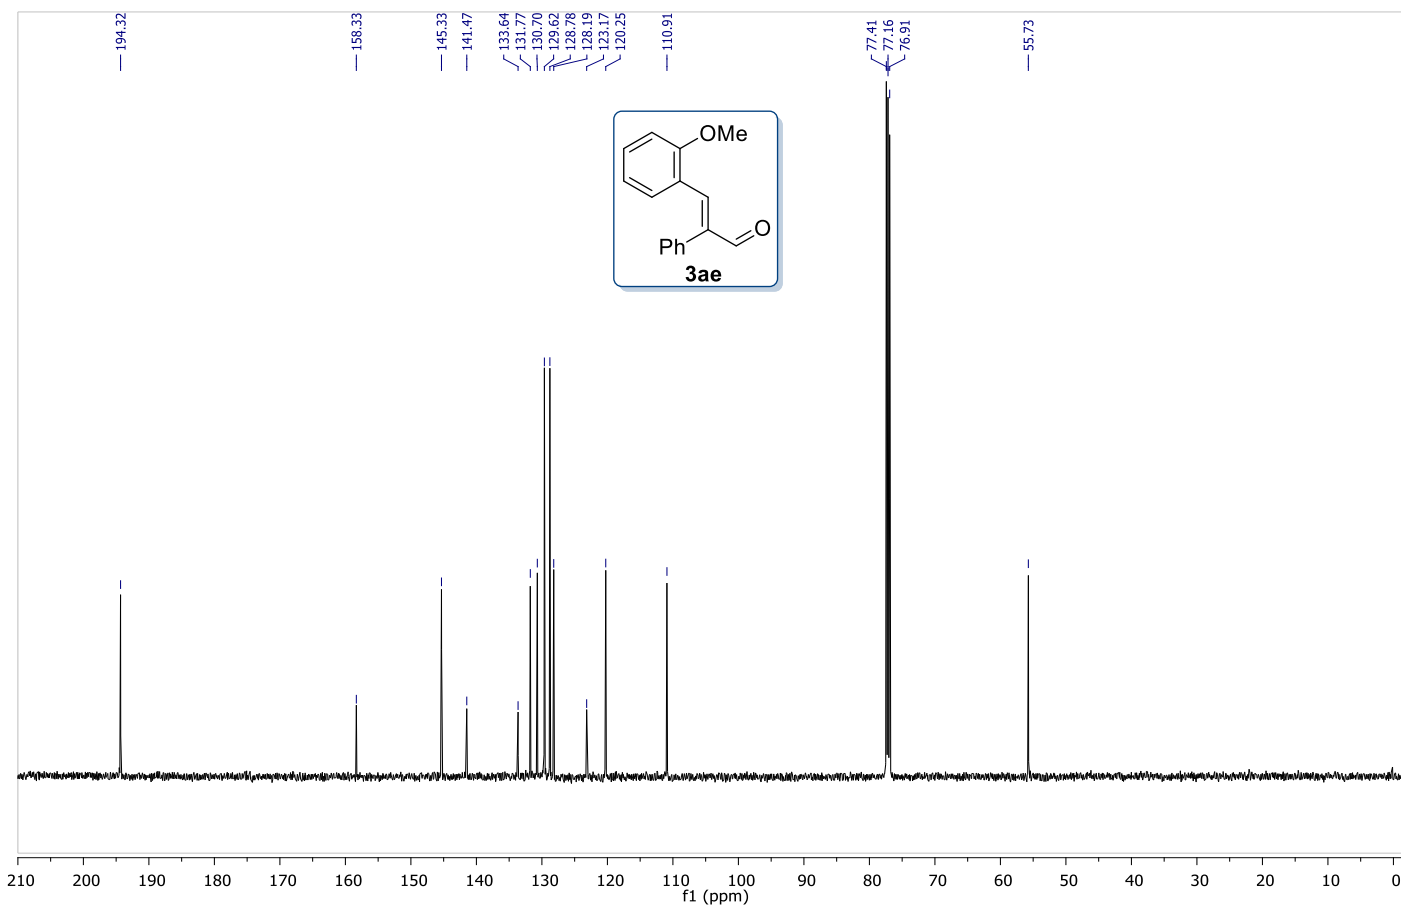

$^1\text{H}$  NMR (500 MHz,  $\text{CDCl}_3$ ) and  $^{13}\text{C}\{^1\text{H}\}$  NMR (126 MHz,  $\text{CDCl}_3$ ), **3af**

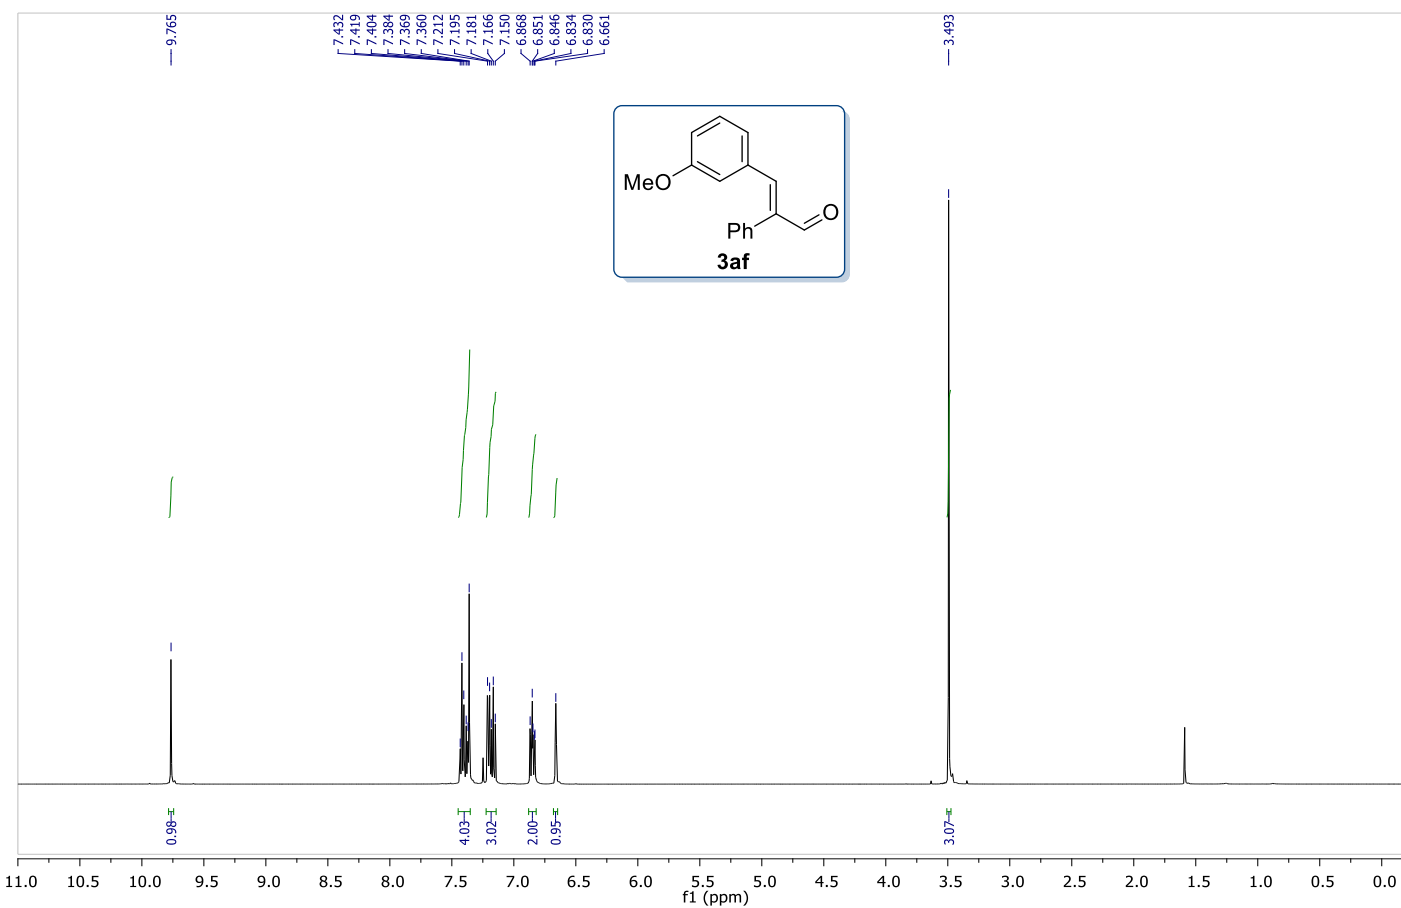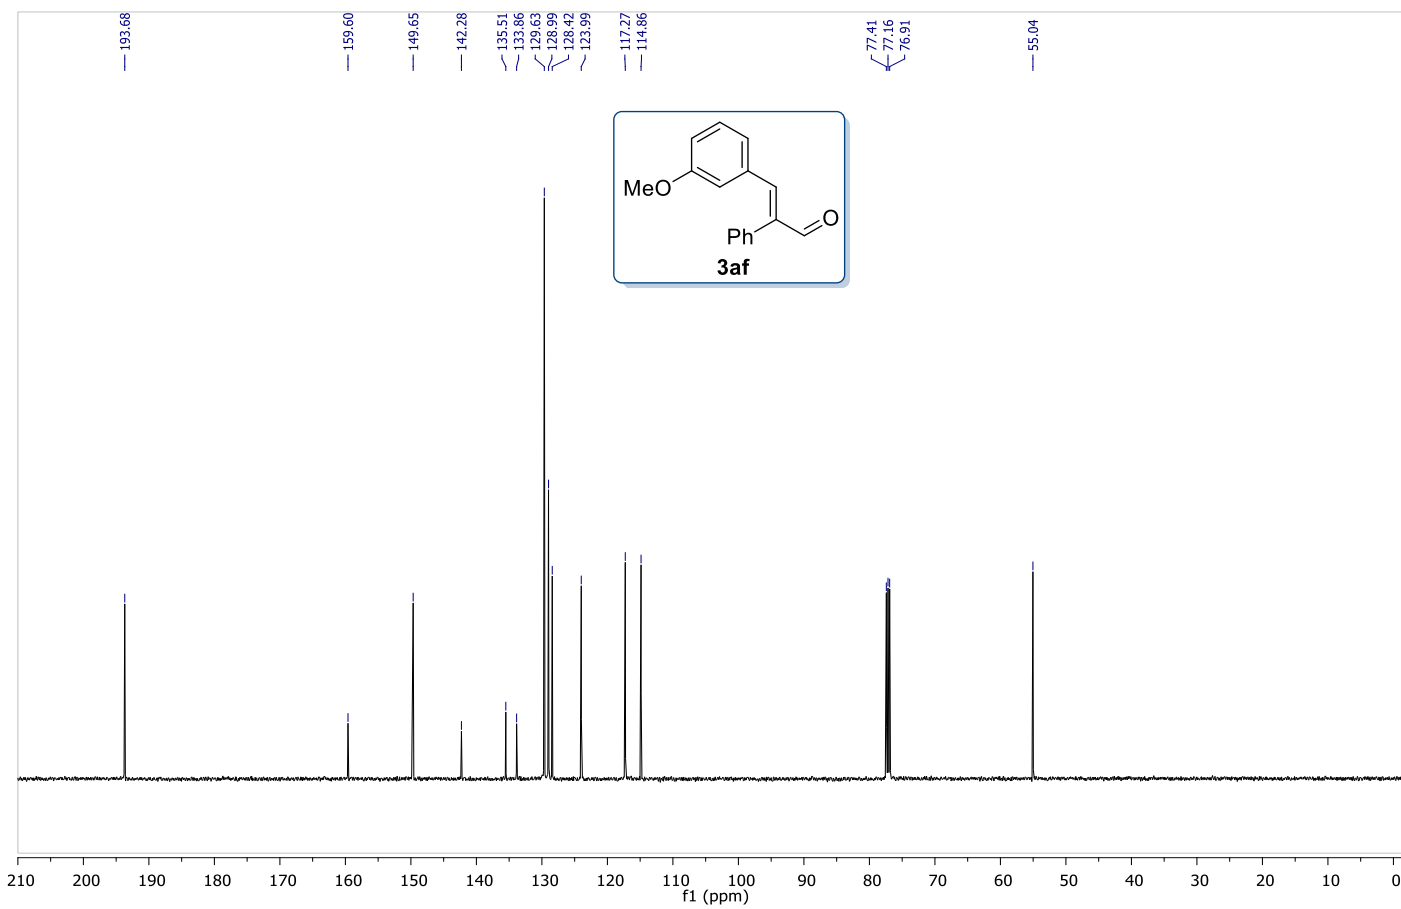

$^1\text{H}$  NMR (500 MHz,  $\text{CDCl}_3$ ) and  $^{13}\text{C}\{^1\text{H}\}$  NMR (126 MHz,  $\text{CDCl}_3$ ), **3ag**

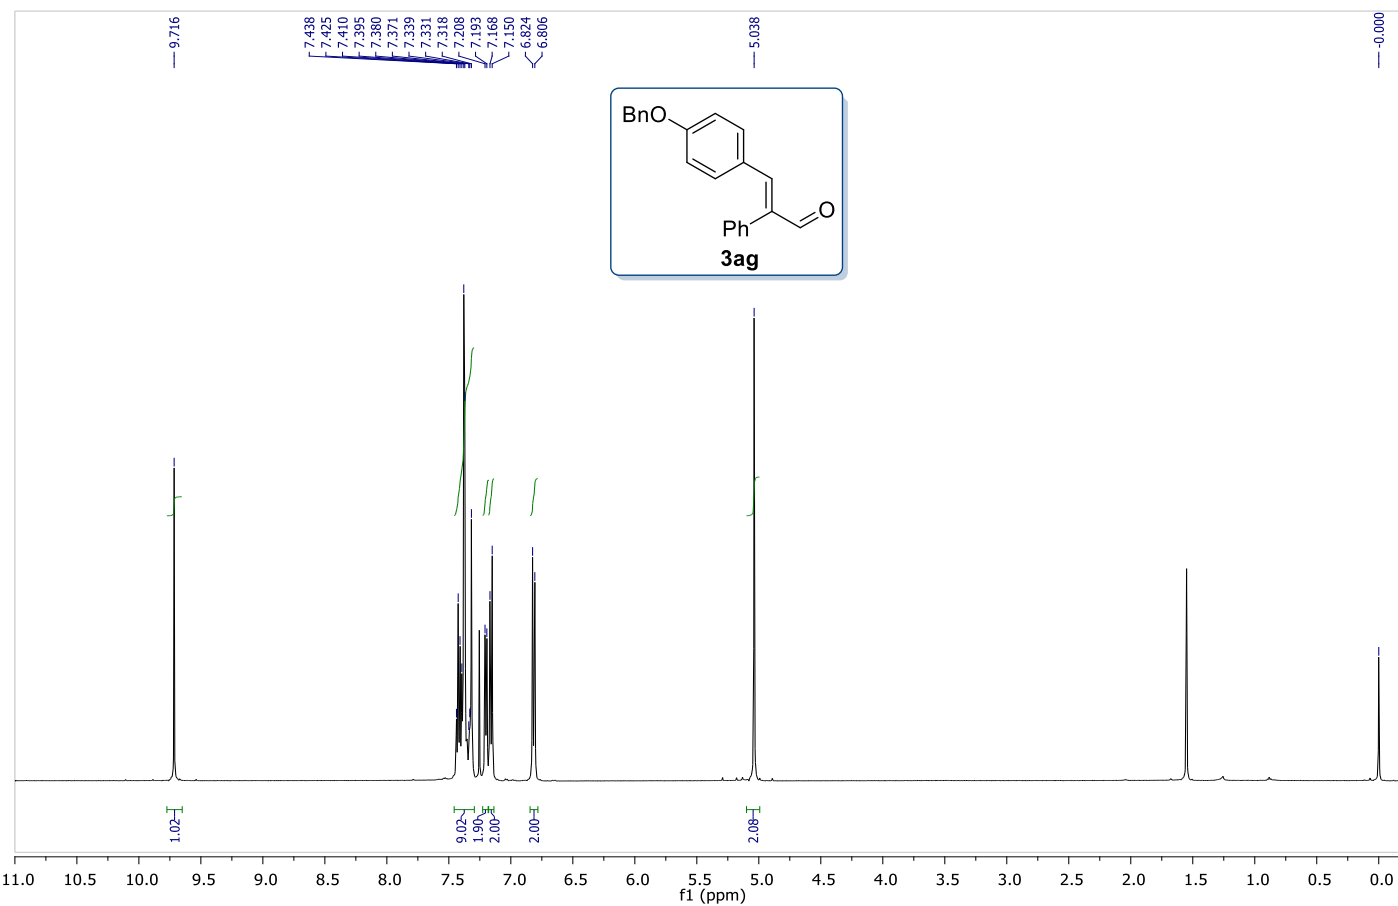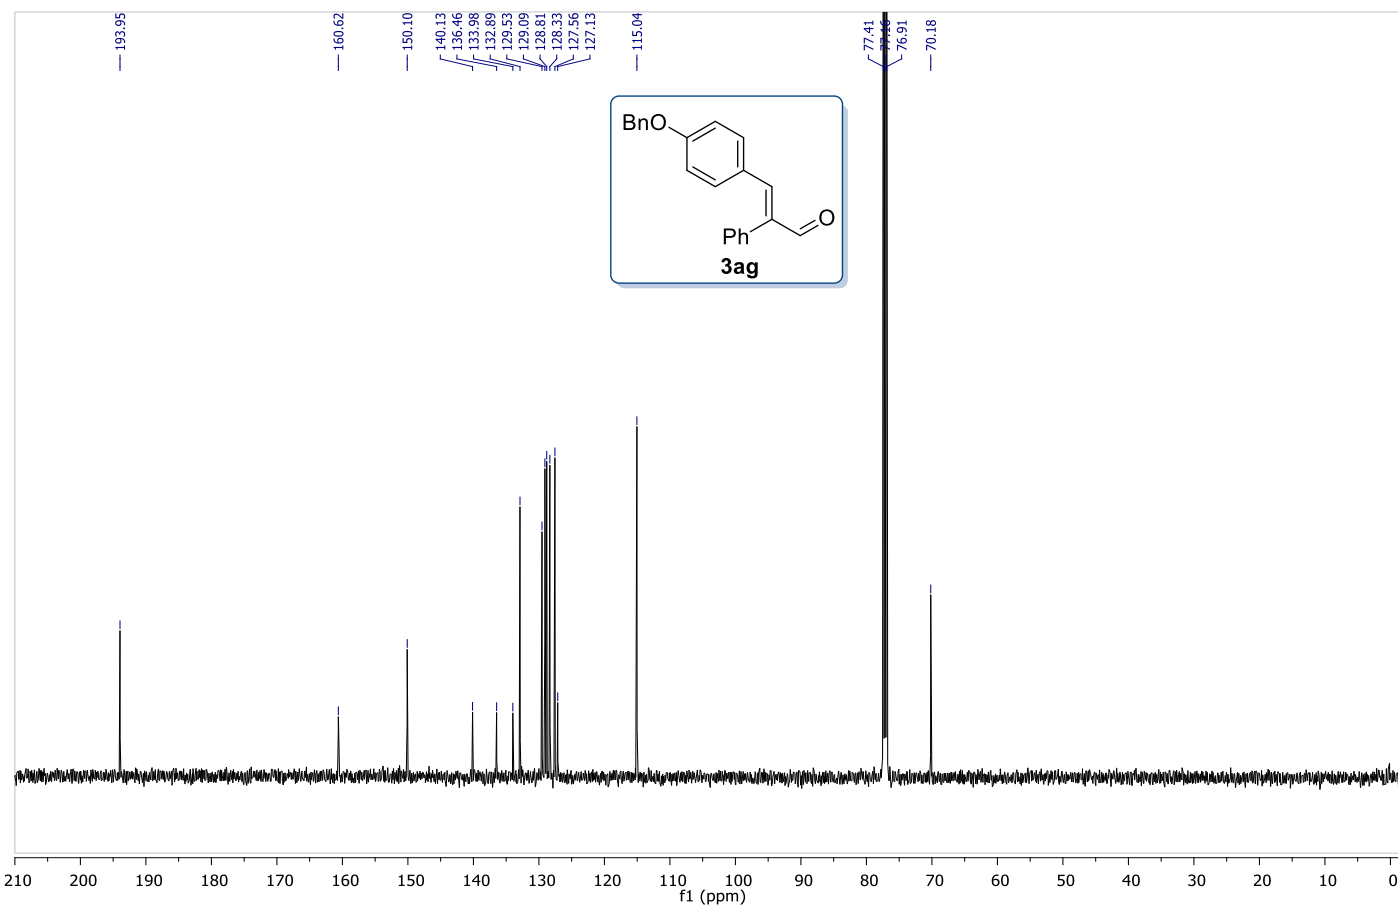

$^1\text{H}$  NMR (600 MHz,  $\text{CDCl}_3$ ) and  $^{13}\text{C}\{^1\text{H}\}$  NMR (151 MHz,  $\text{CDCl}_3$ ), **3ah**

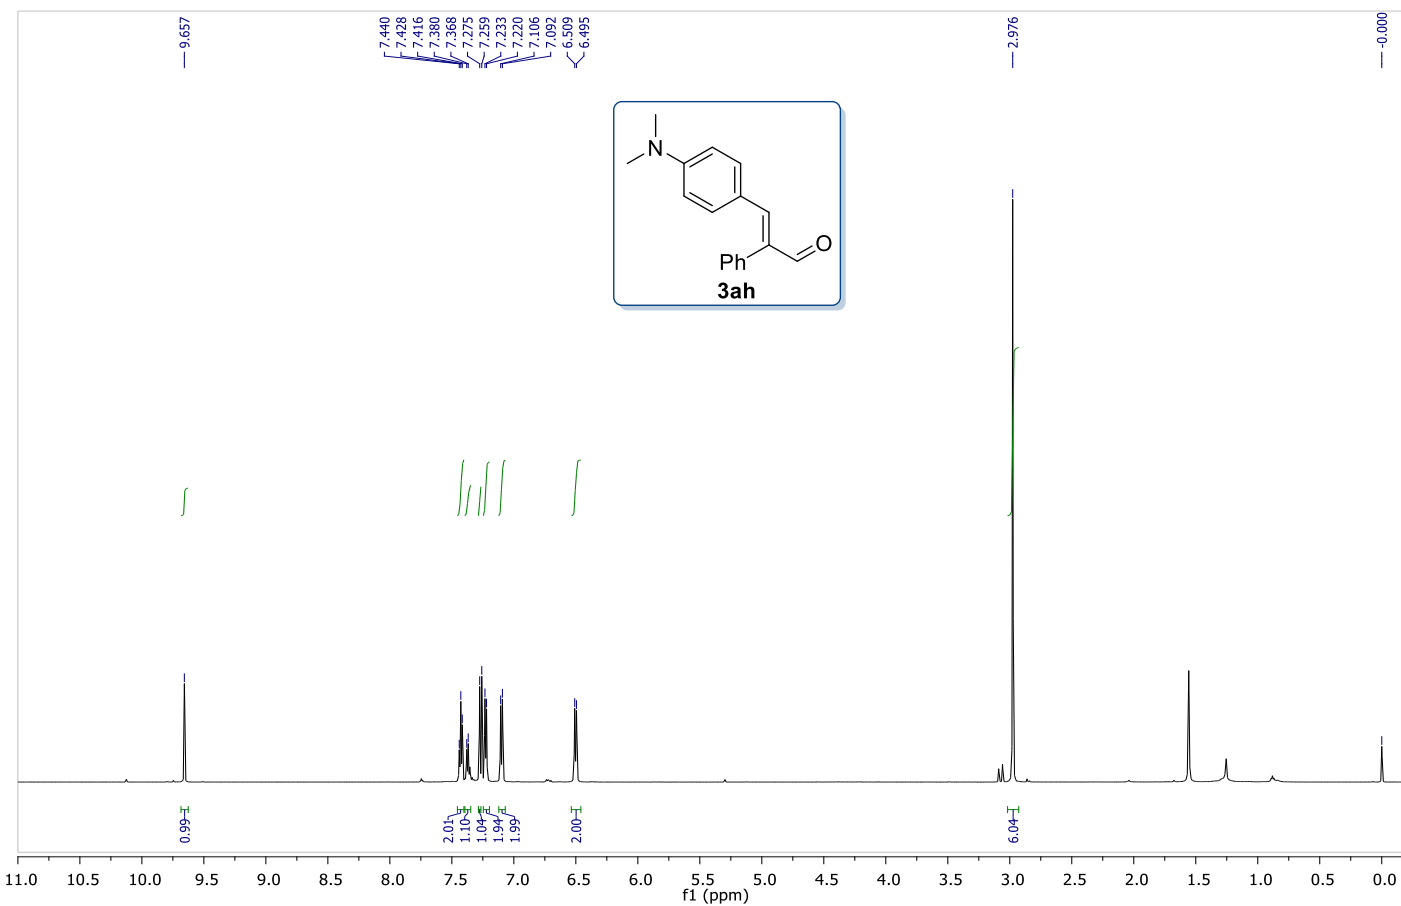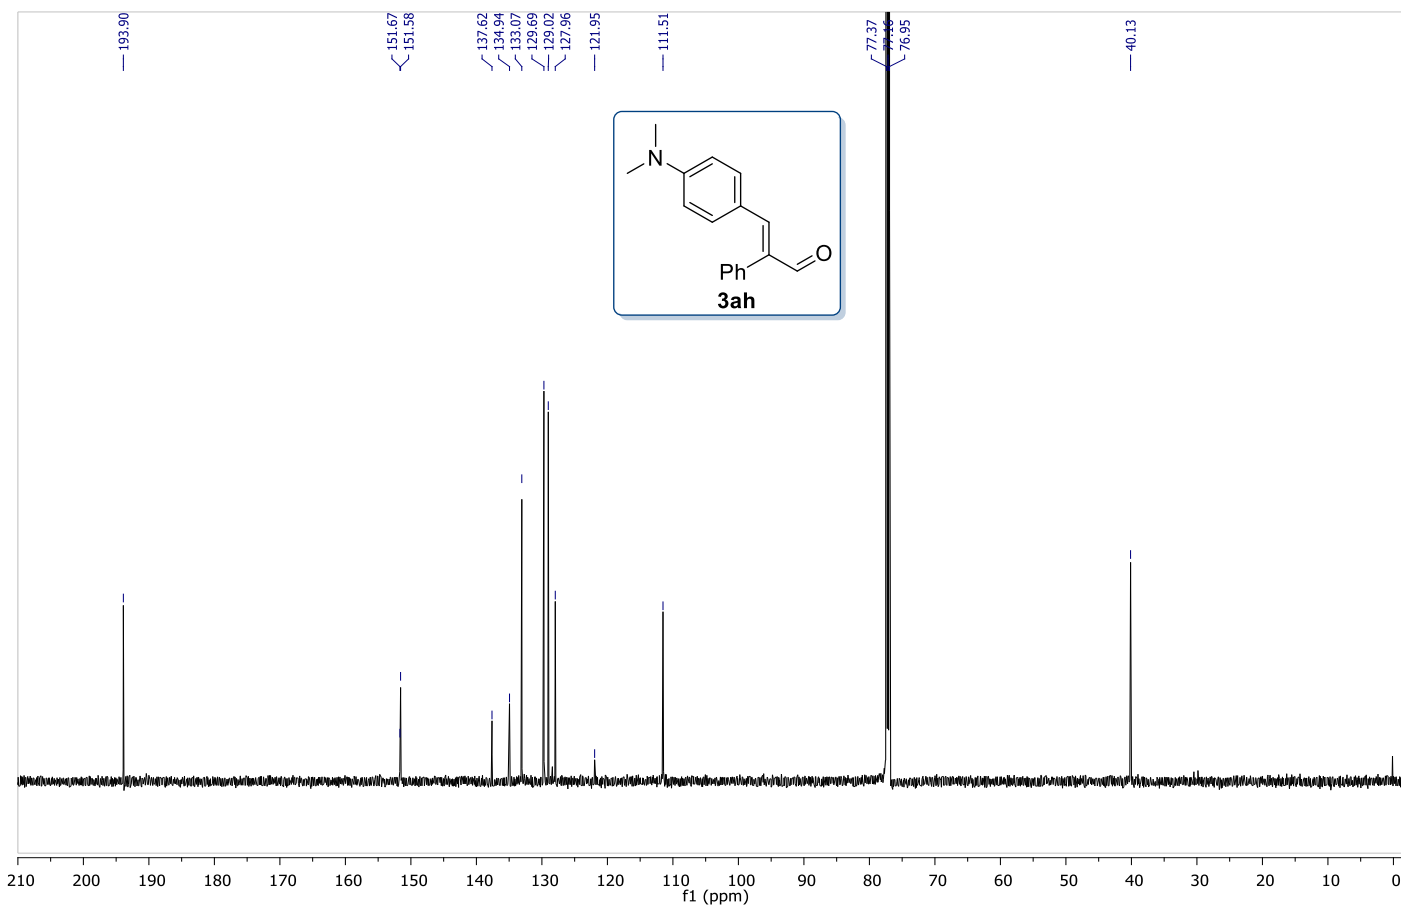

$^1\text{H}$  NMR (500 MHz,  $\text{CDCl}_3$ ) and  $^{13}\text{C}$ { $^1\text{H}$ } NMR (126 MHz,  $\text{CDCl}_3$ ), **3ai**

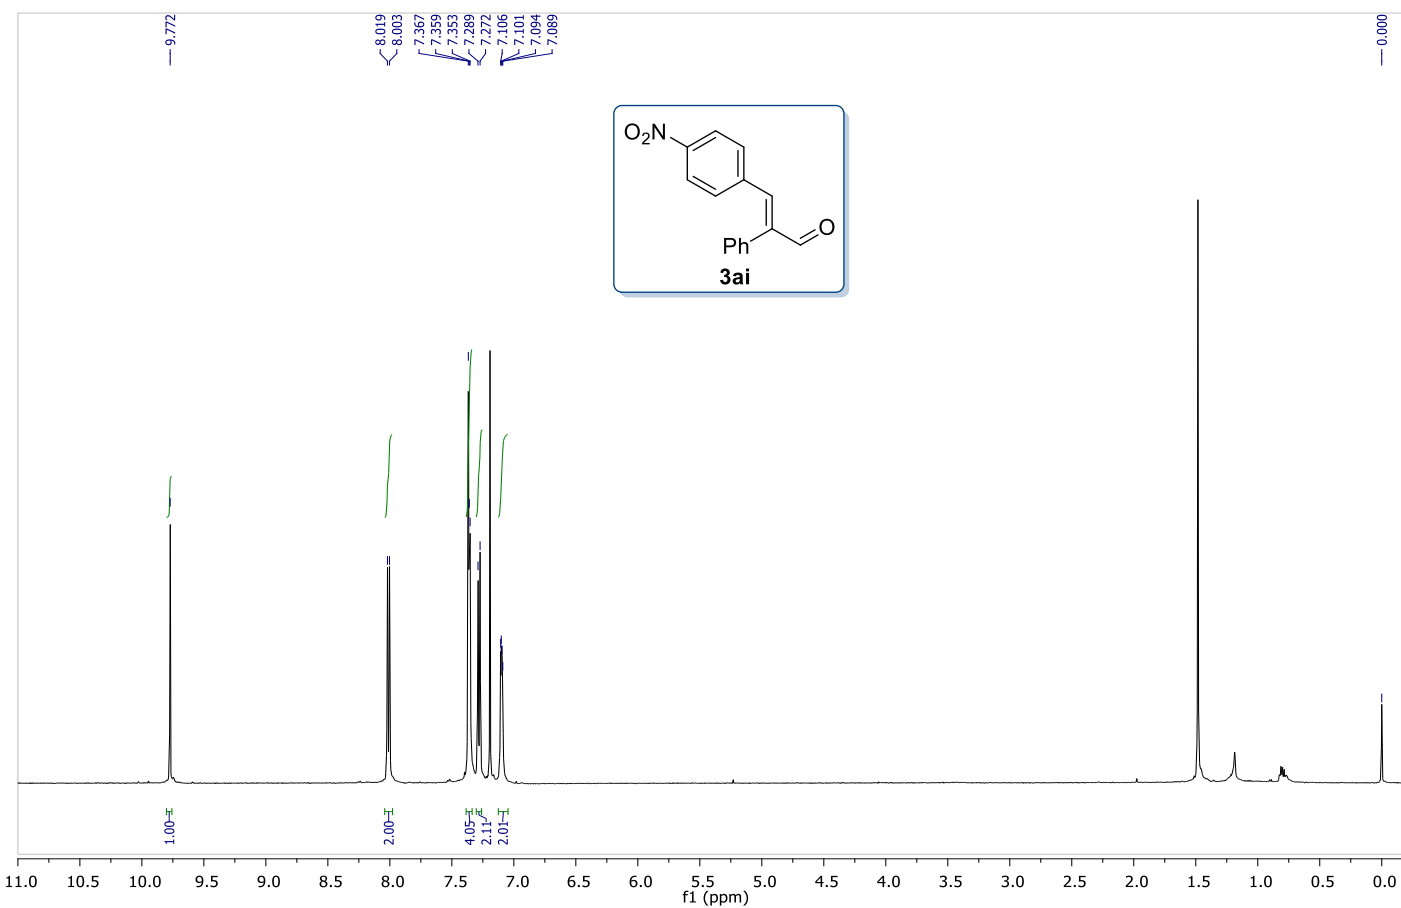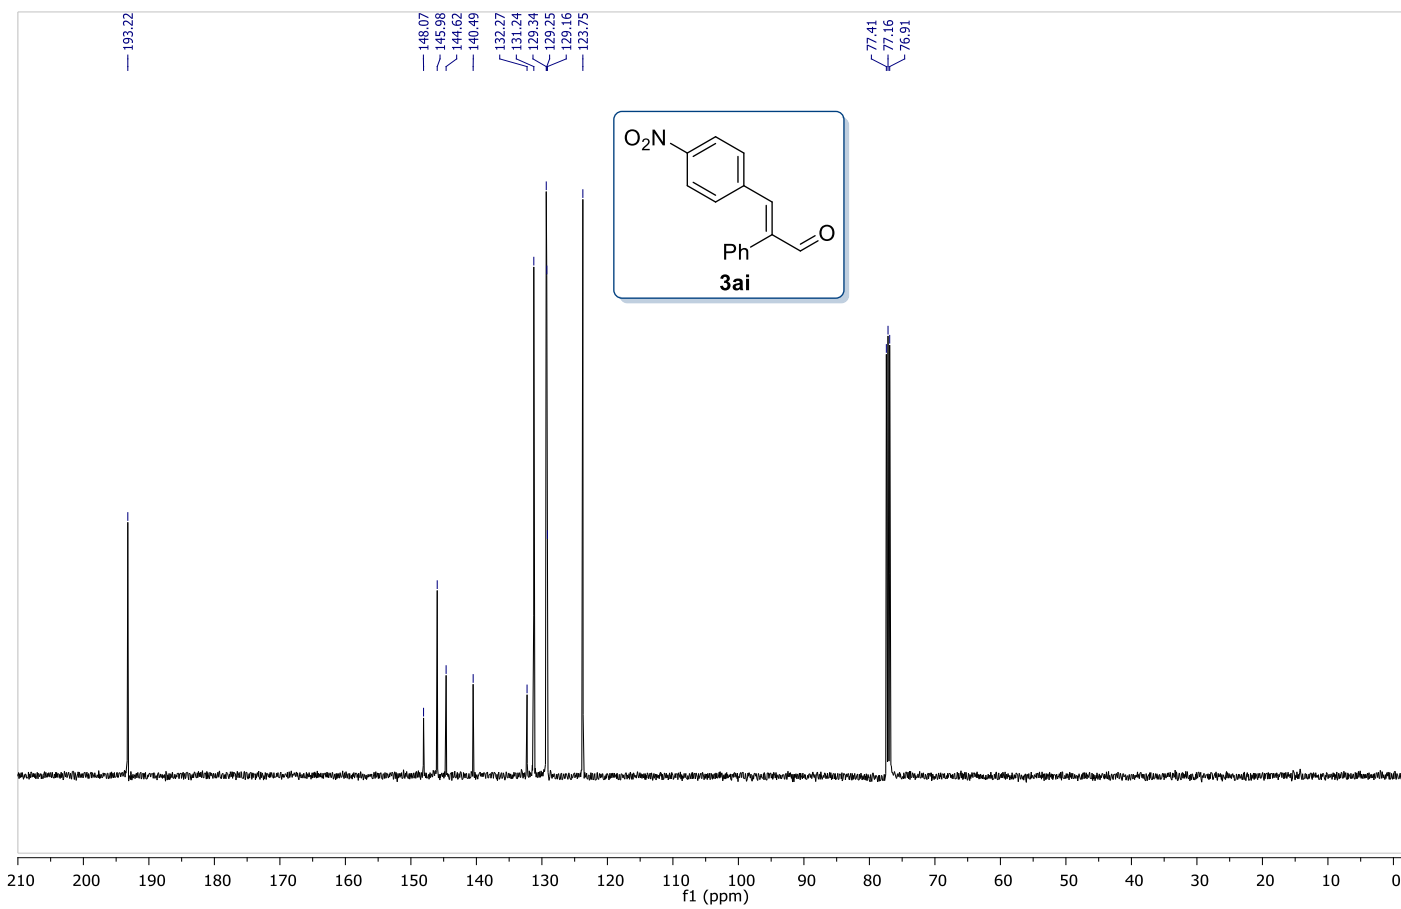

$^1\text{H}$  NMR (500 MHz,  $\text{CDCl}_3$ ) and  $^{13}\text{C}\{^1\text{H}\}$  NMR (126 MHz,  $\text{CDCl}_3$ ), **3aj**

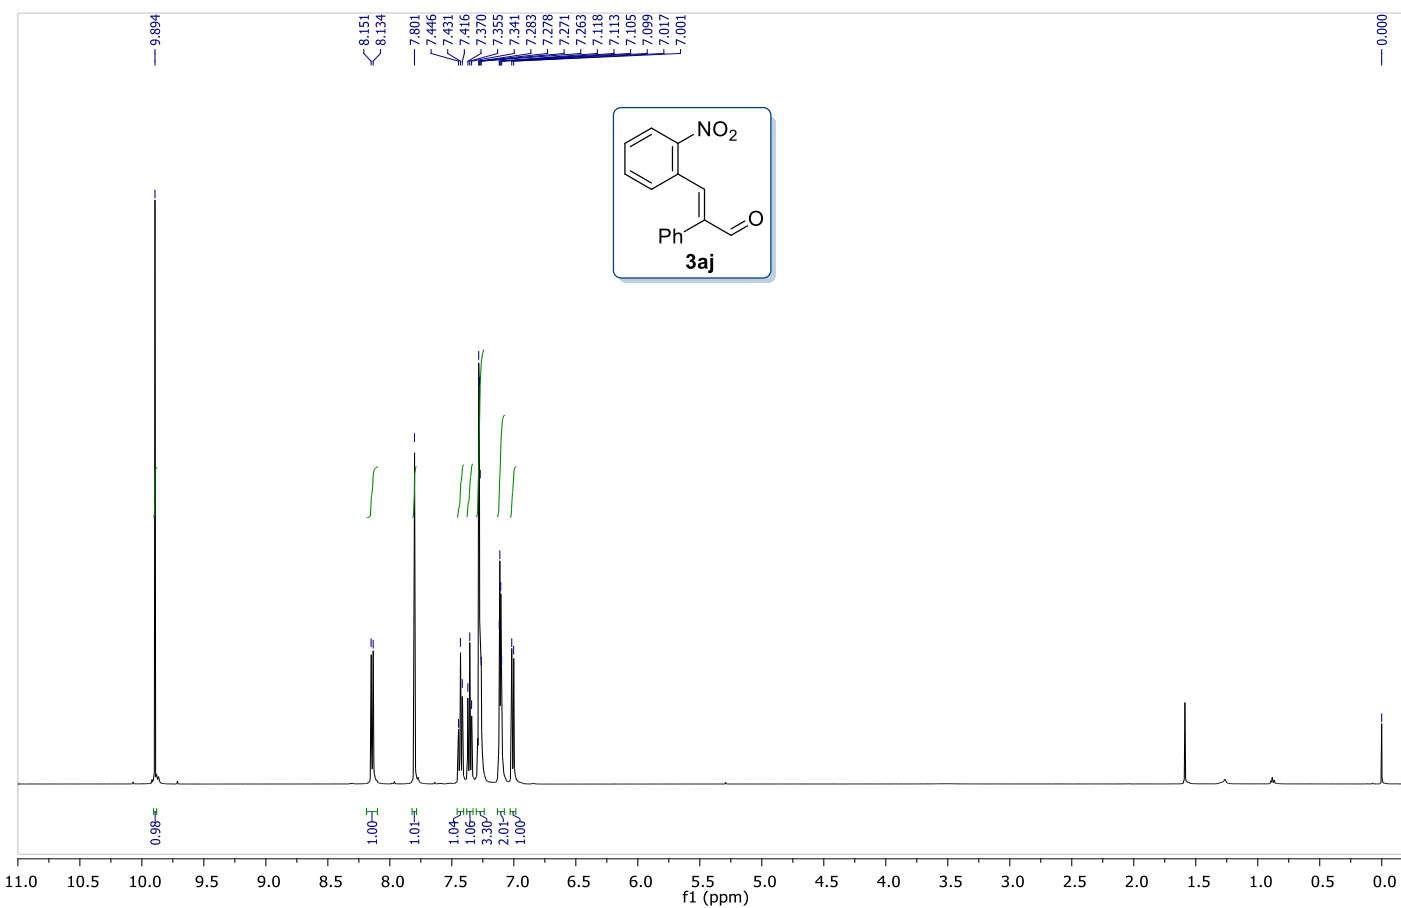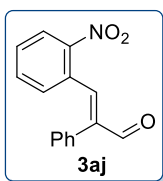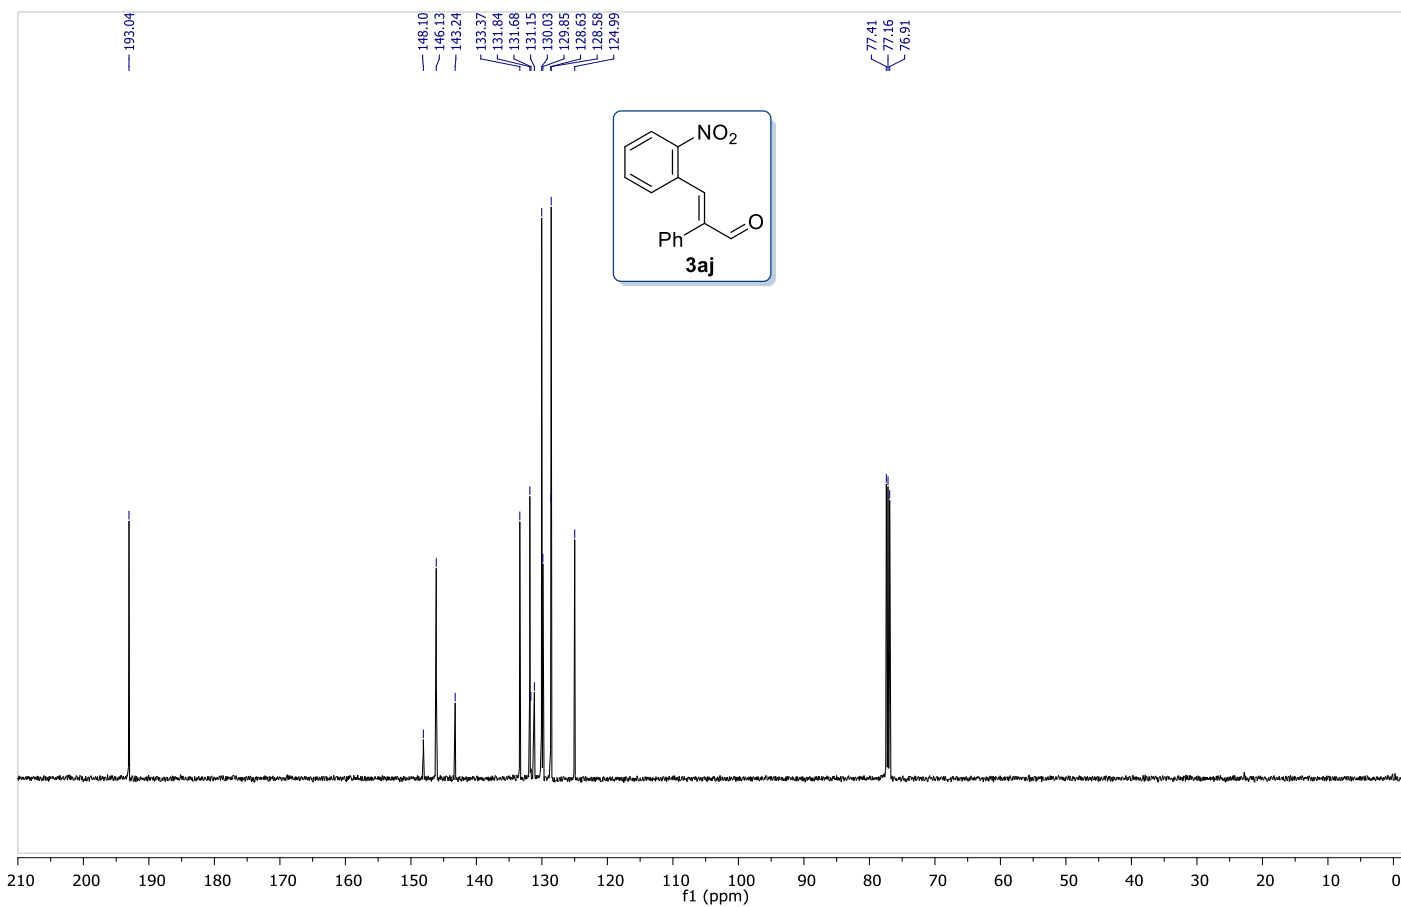

$^1\text{H}$  NMR (500 MHz,  $\text{CDCl}_3$ ) and  $^{13}\text{C}\{^1\text{H}\}$  NMR (126 MHz,  $\text{CDCl}_3$ ), **3ak**

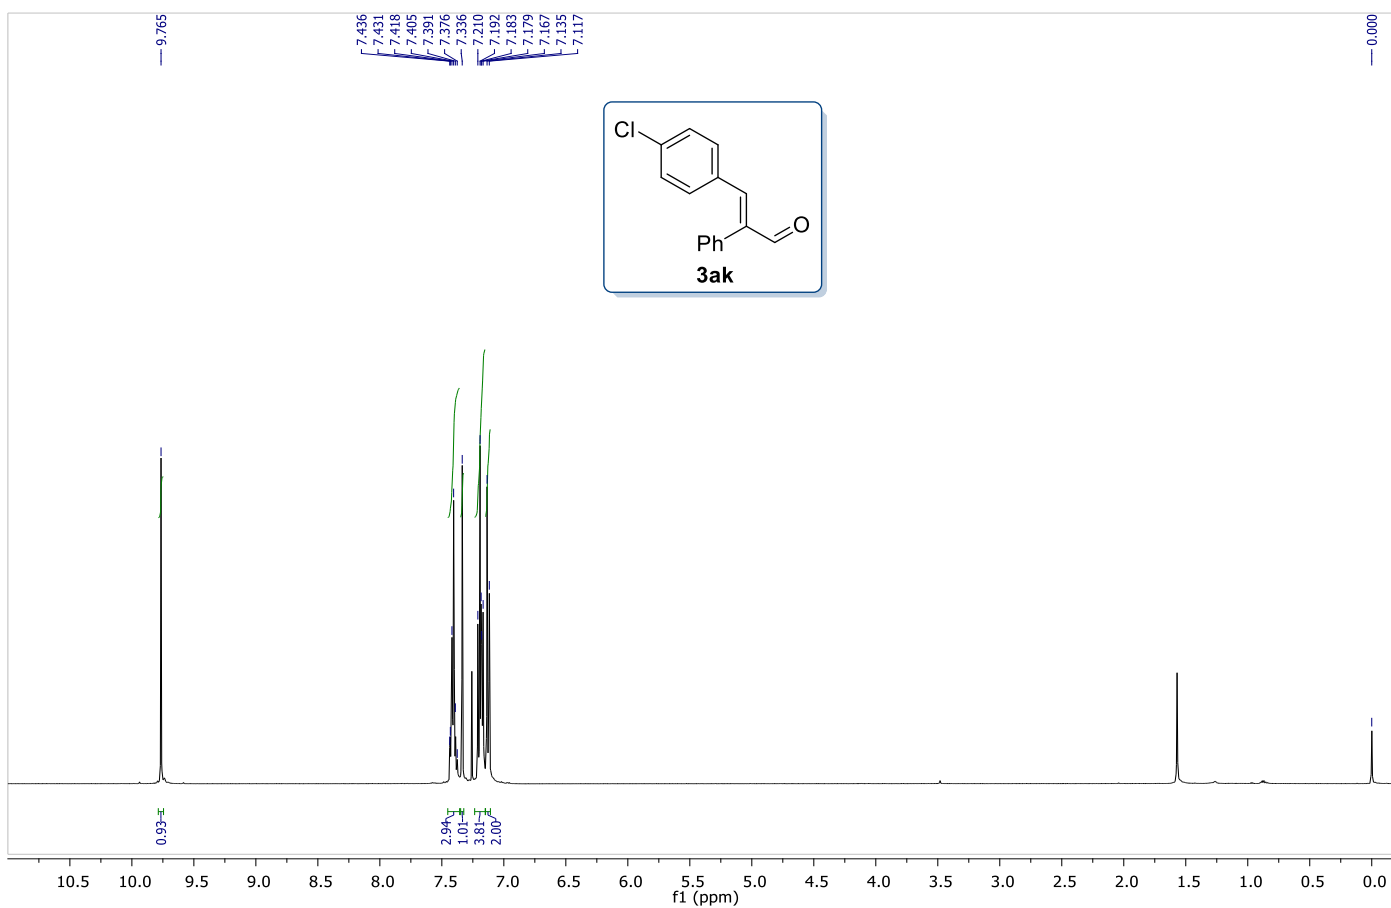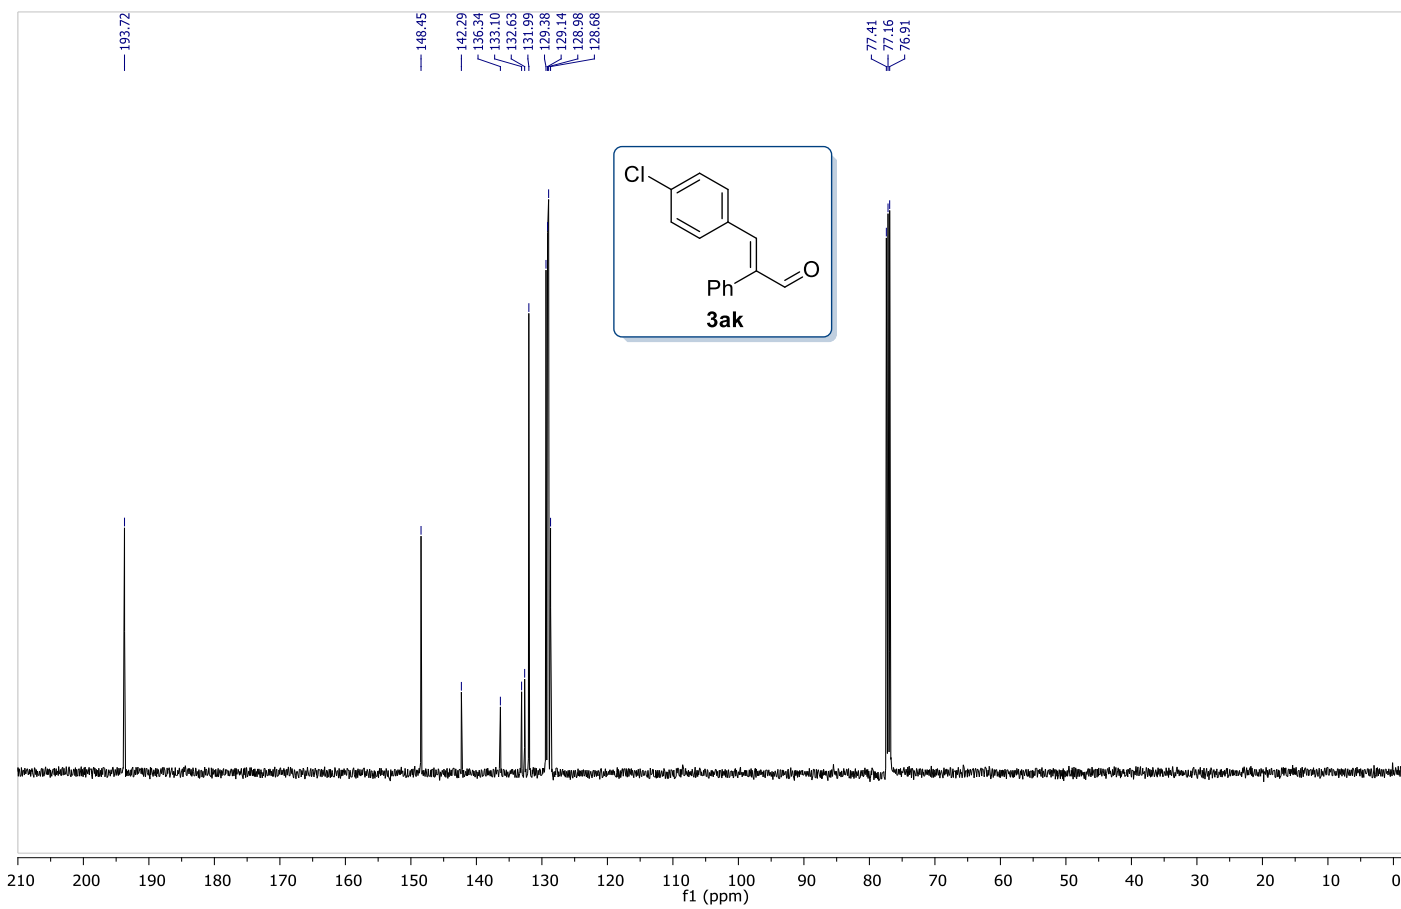

$^1\text{H}$  NMR (600 MHz,  $\text{CDCl}_3$ ) and  $^{13}\text{C}\{^1\text{H}\}$  NMR (151 MHz,  $\text{CDCl}_3$ ), **3al**

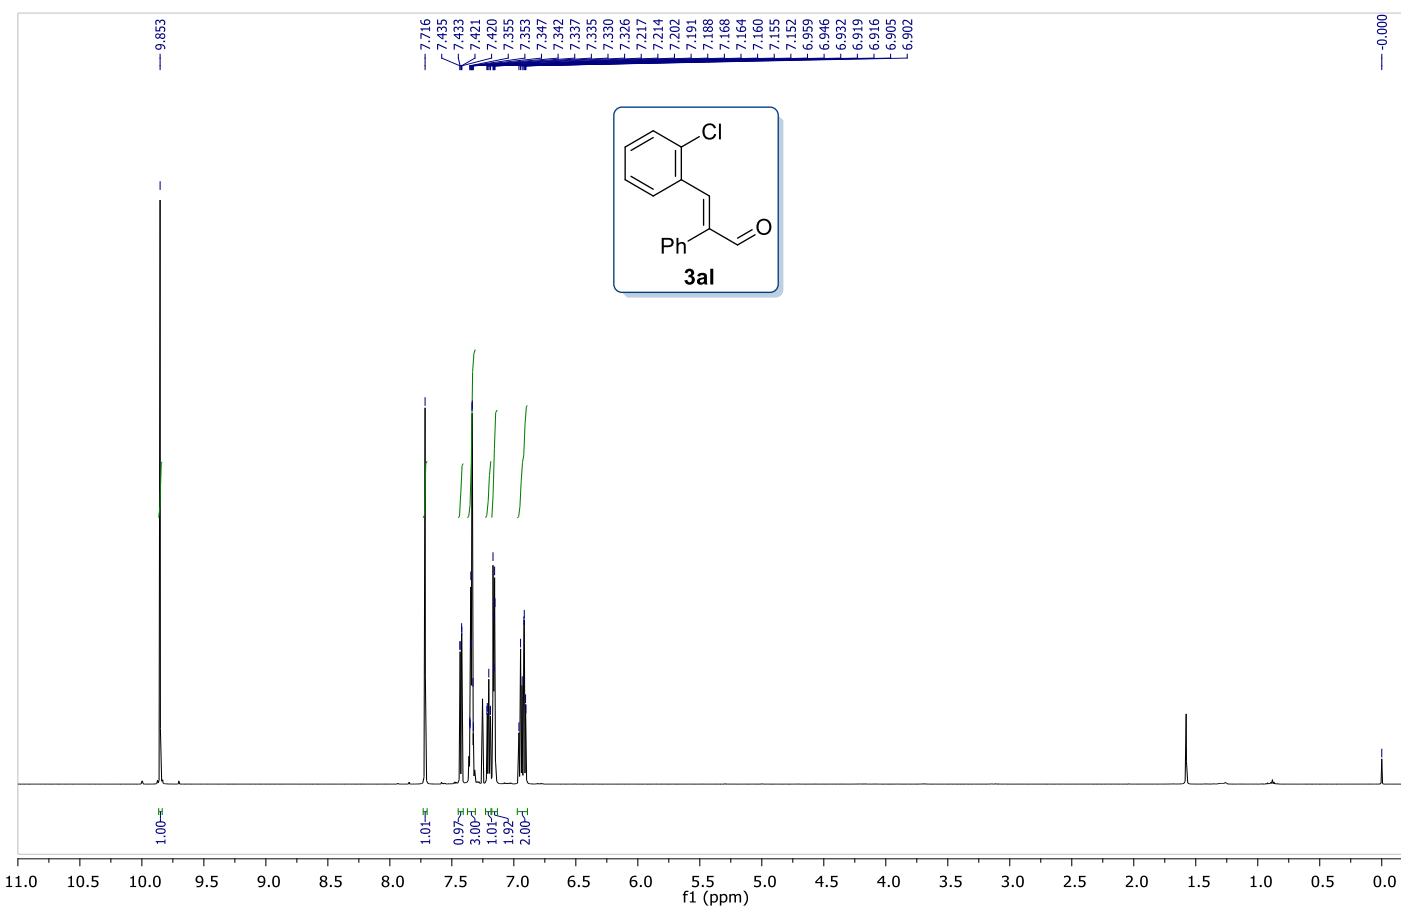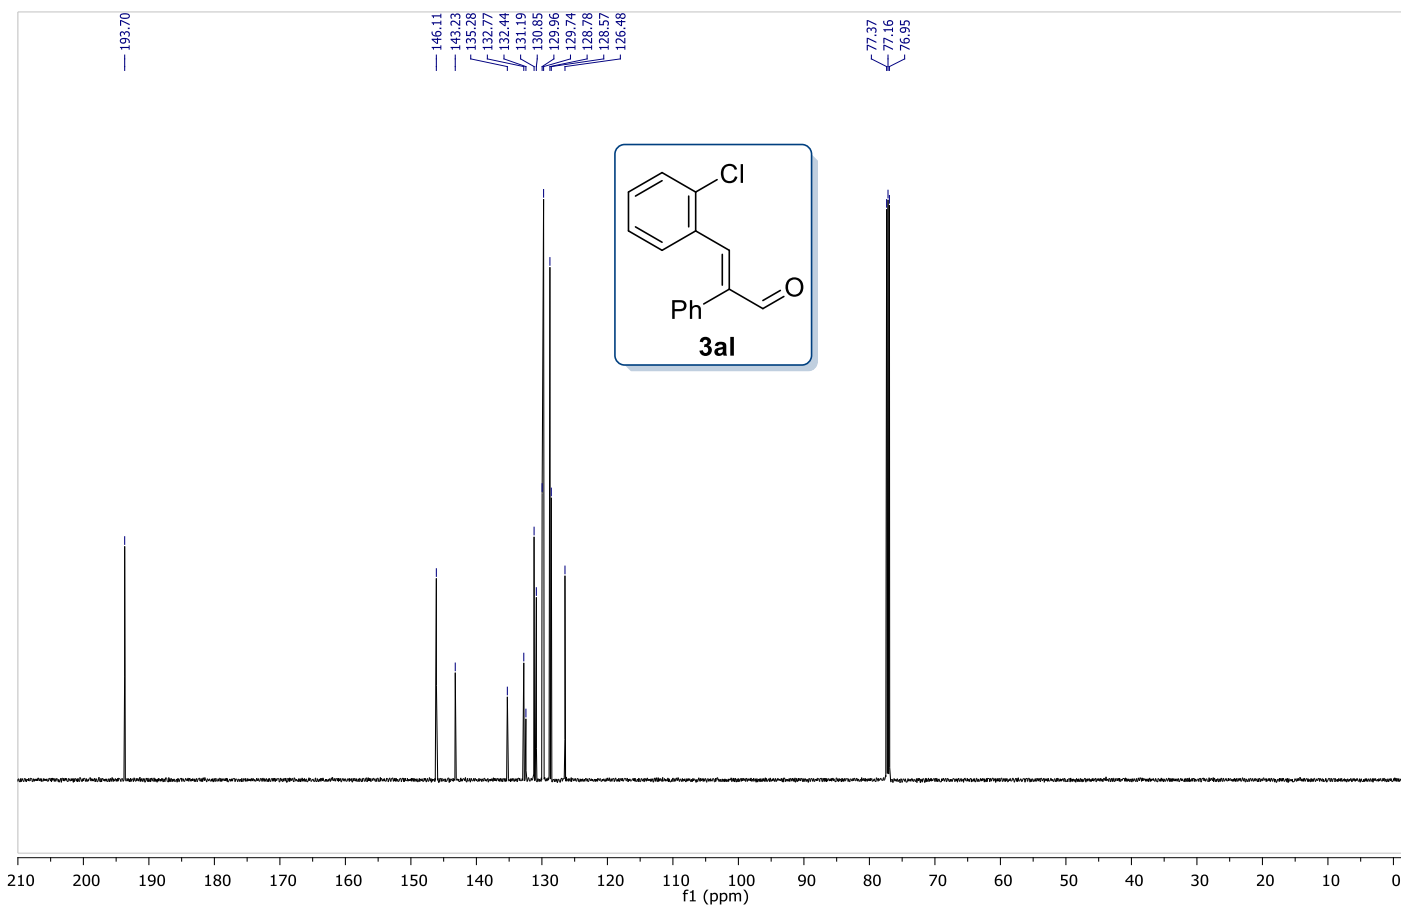

$^1\text{H}$  NMR (600 MHz,  $\text{CDCl}_3$ ) and  $^{13}\text{C}$   $\{^1\text{H}\}$  NMR (151 MHz,  $\text{CDCl}_3$ ), **3am**

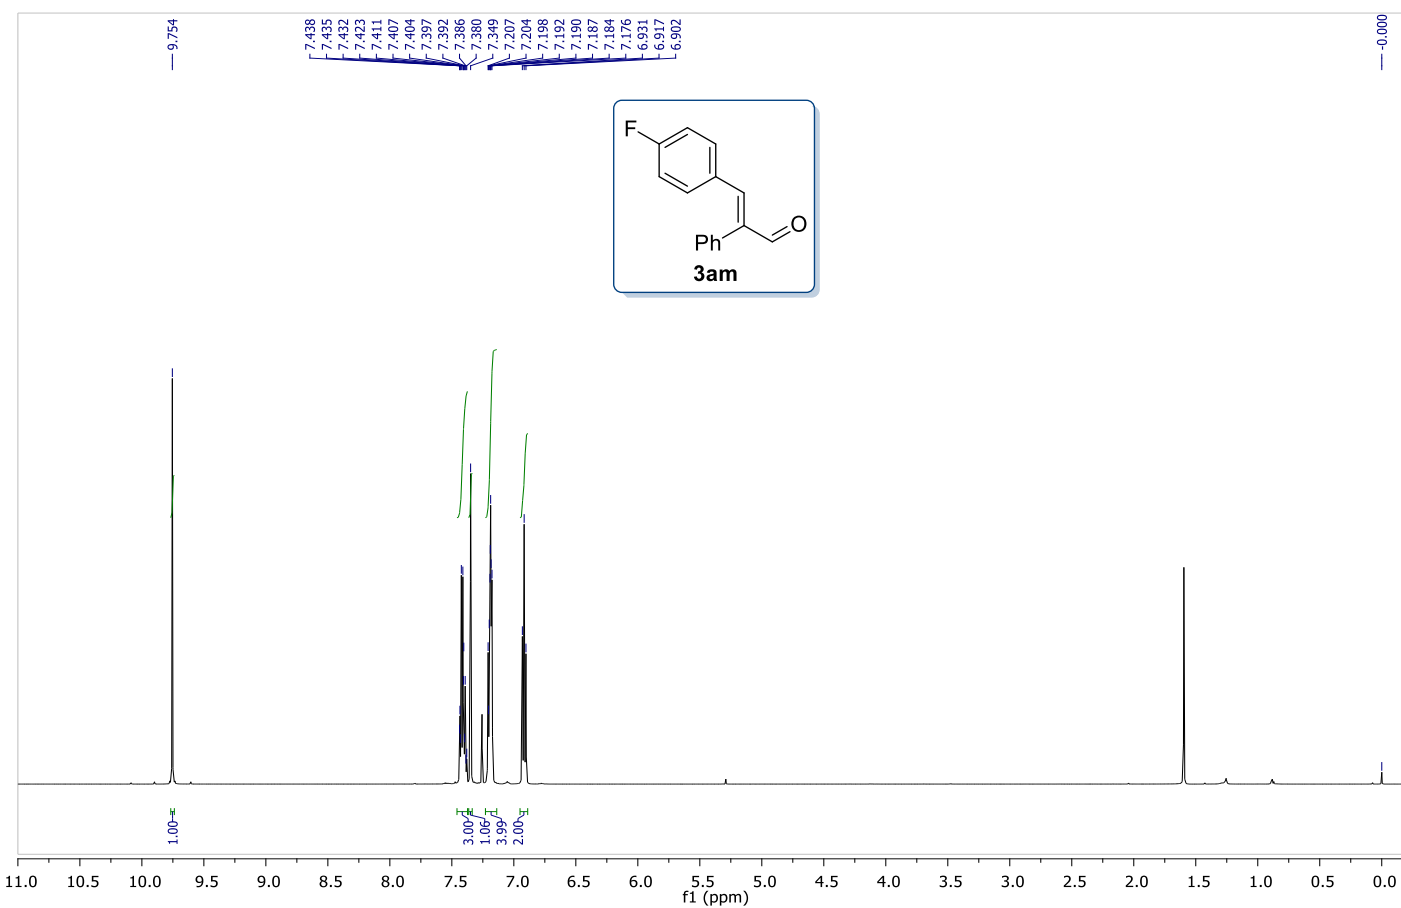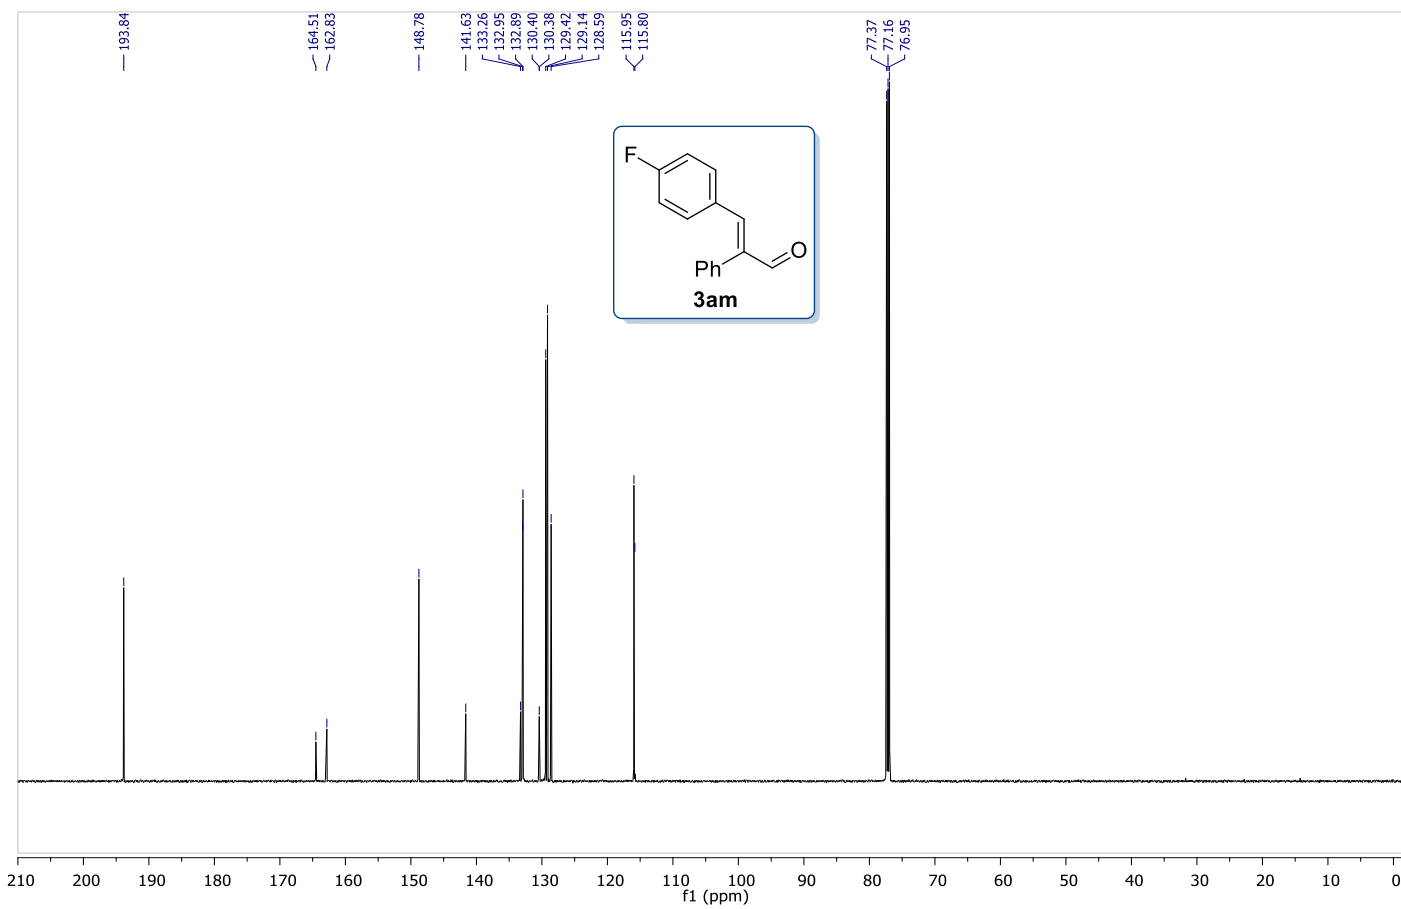

$^1\text{H}$  NMR (500 MHz,  $\text{CDCl}_3$ ) and  $^{13}\text{C}\{^1\text{H}\}$  NMR (126 MHz,  $\text{CDCl}_3$ ), **3an**

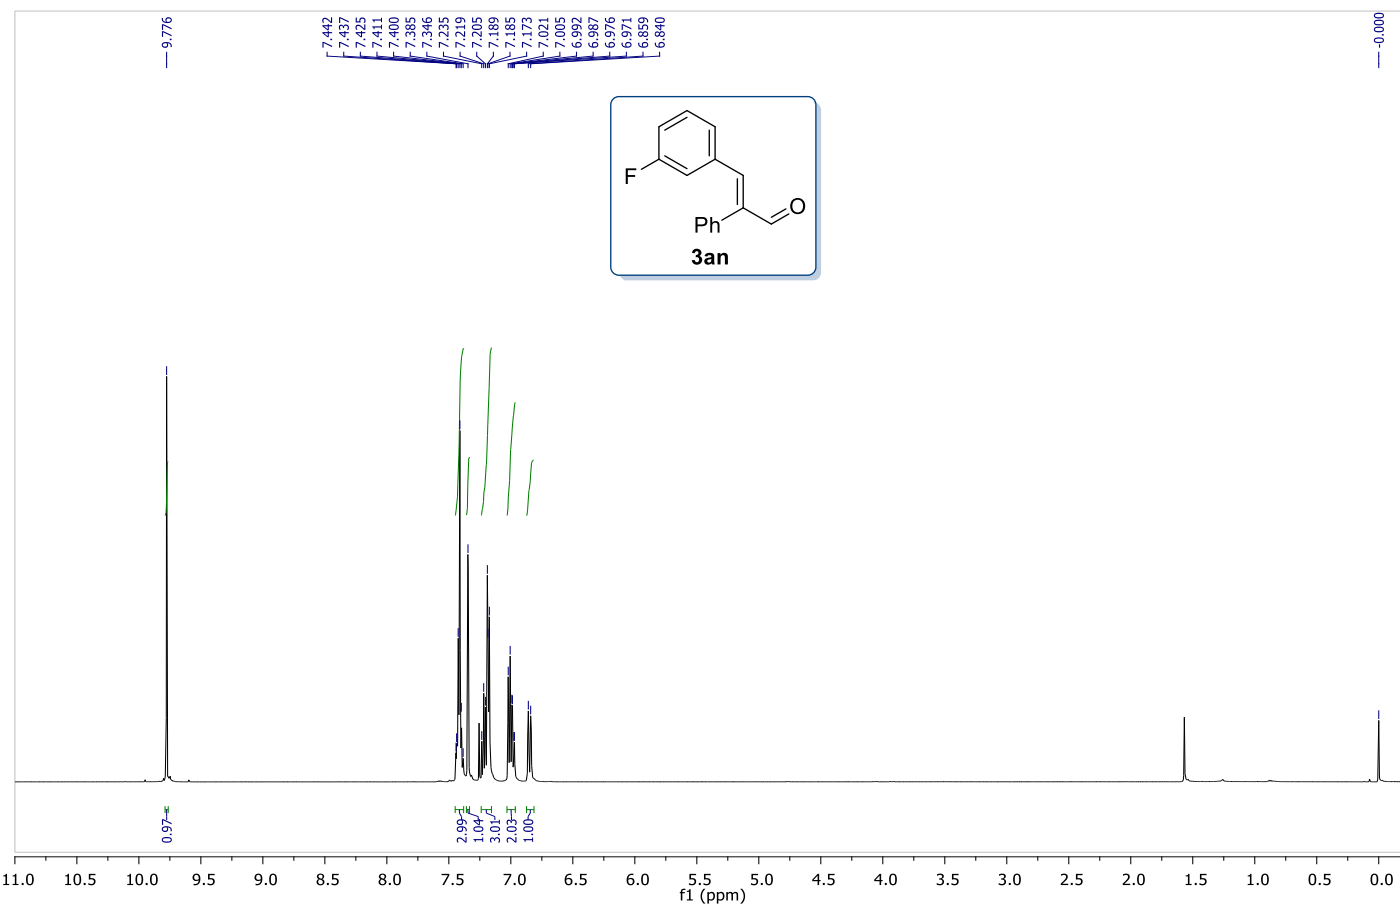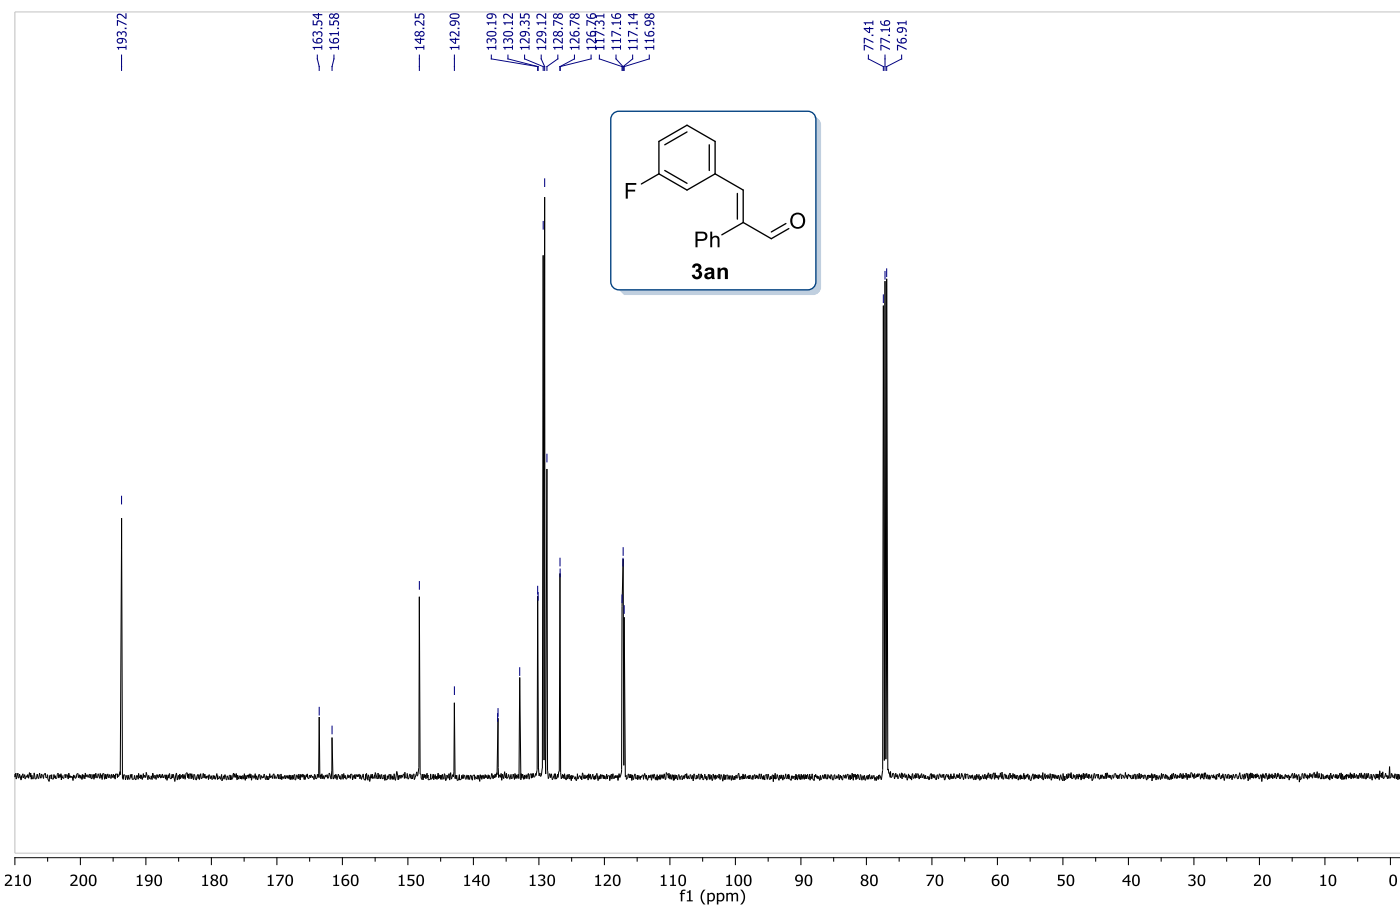

$^1\text{H}$  NMR (500 MHz,  $\text{CDCl}_3$ ) and  $^{13}\text{C}\{^1\text{H}\}$  NMR (151 MHz,  $\text{CDCl}_3$ ), **3ao**

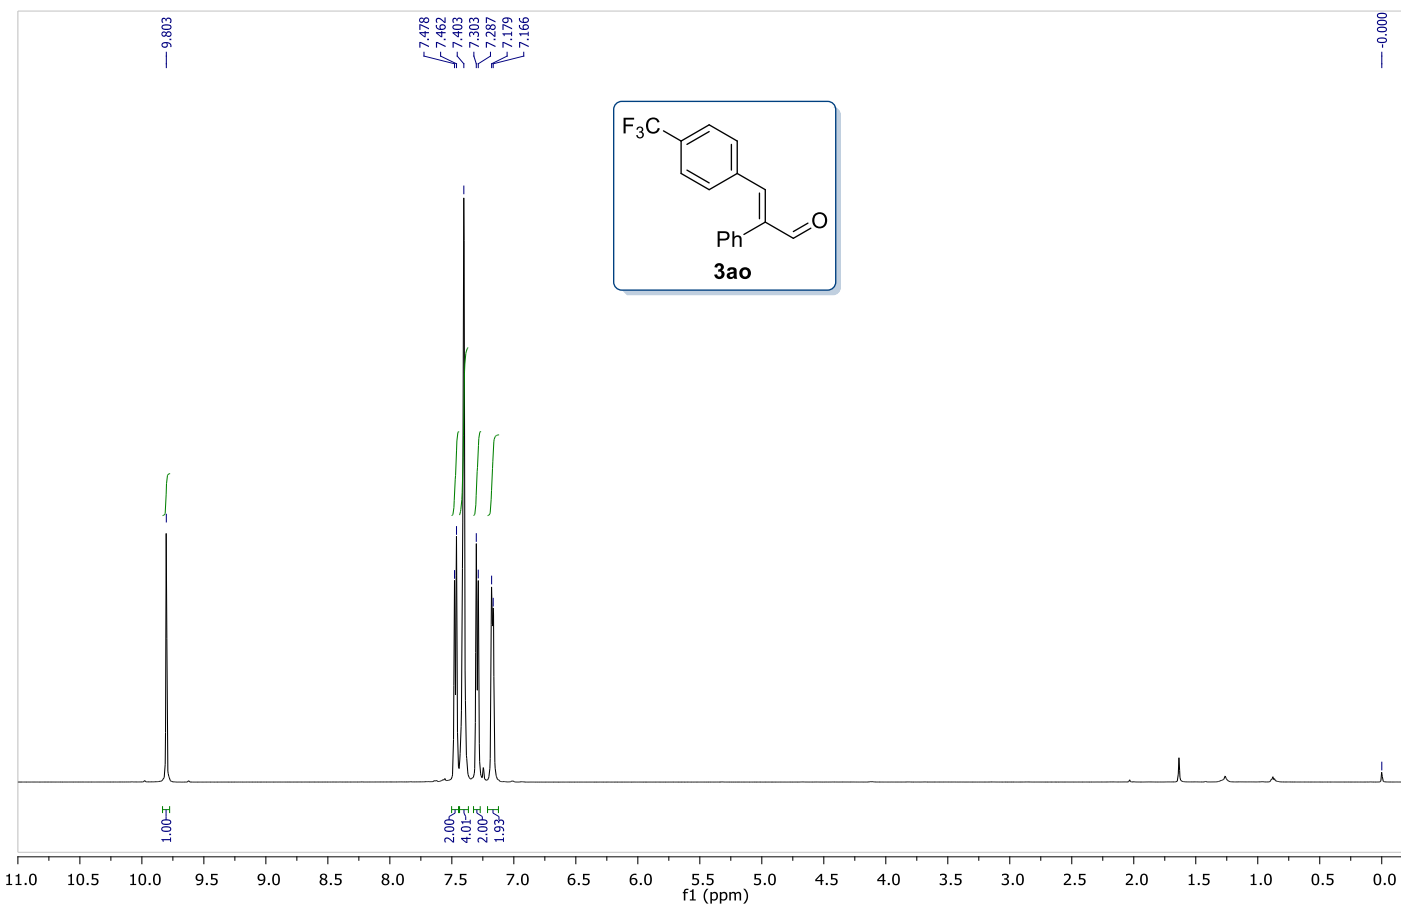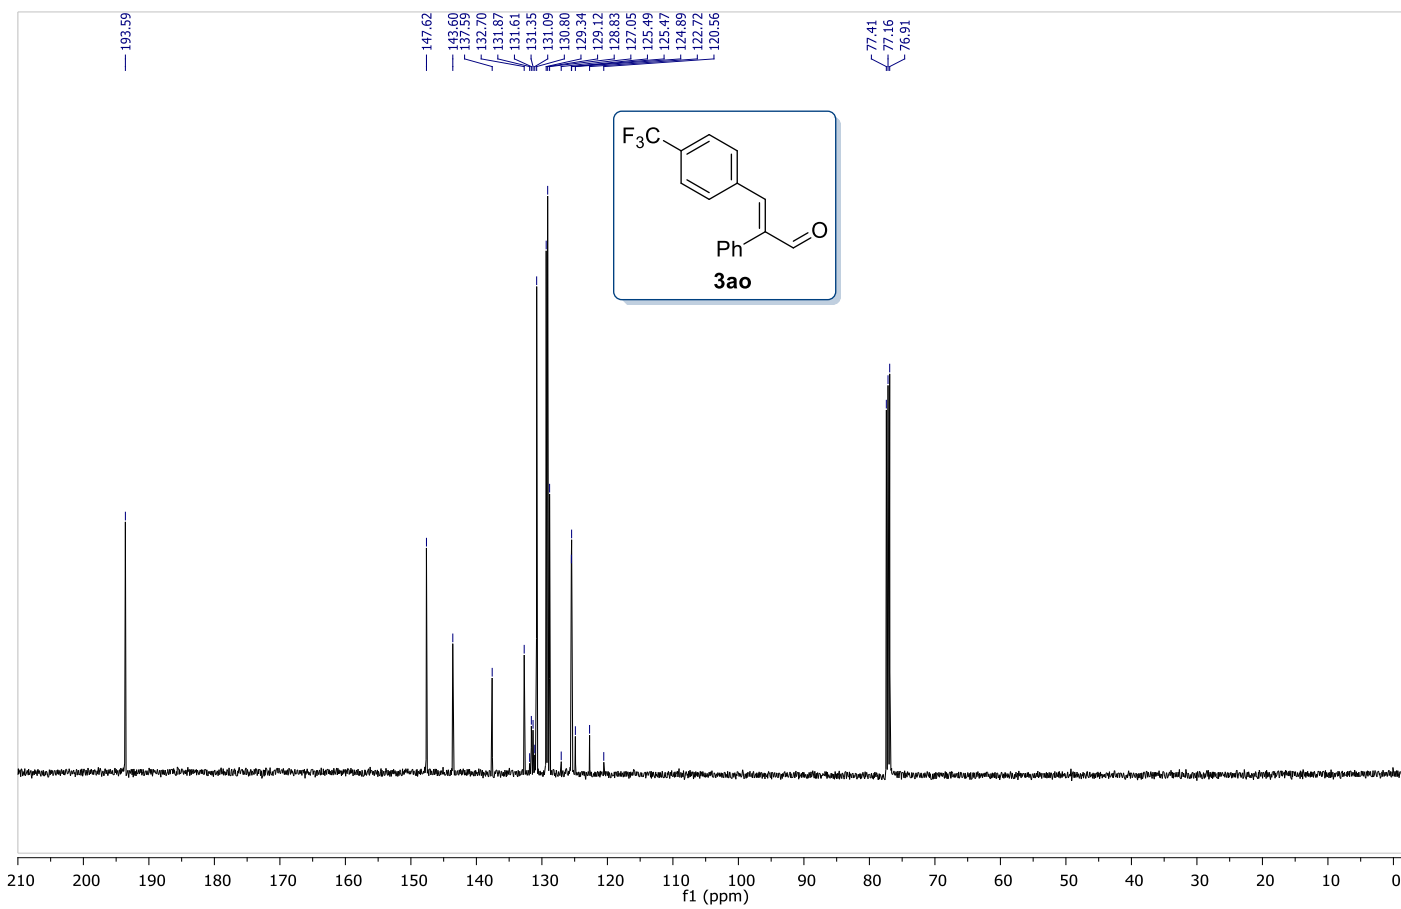

$^1\text{H}$  NMR (500 MHz,  $\text{CDCl}_3$ ) and  $^{13}\text{C}\{^1\text{H}\}$  NMR (126 MHz,  $\text{CDCl}_3$ ), **3ap**

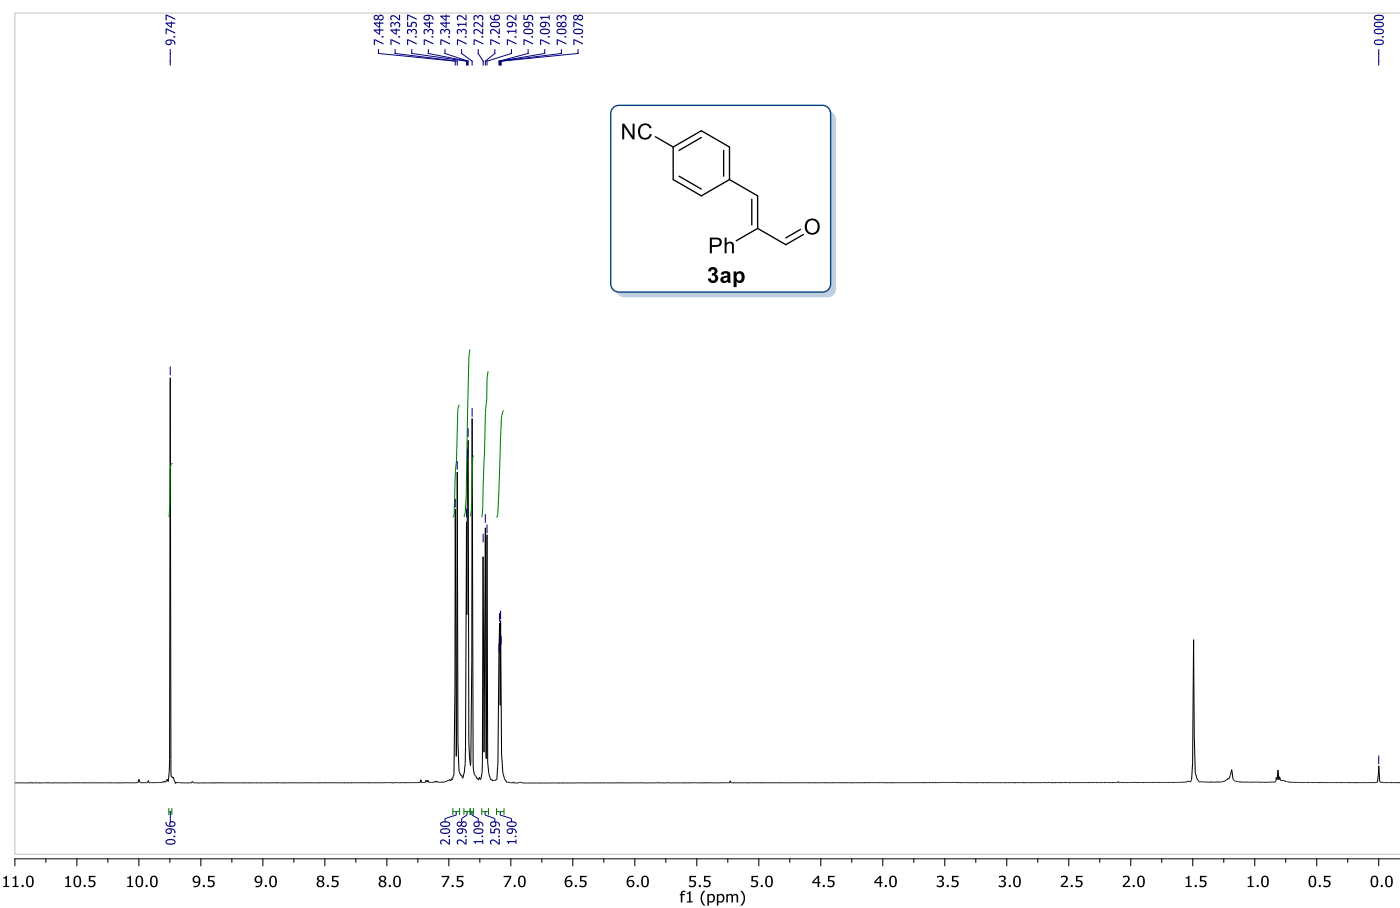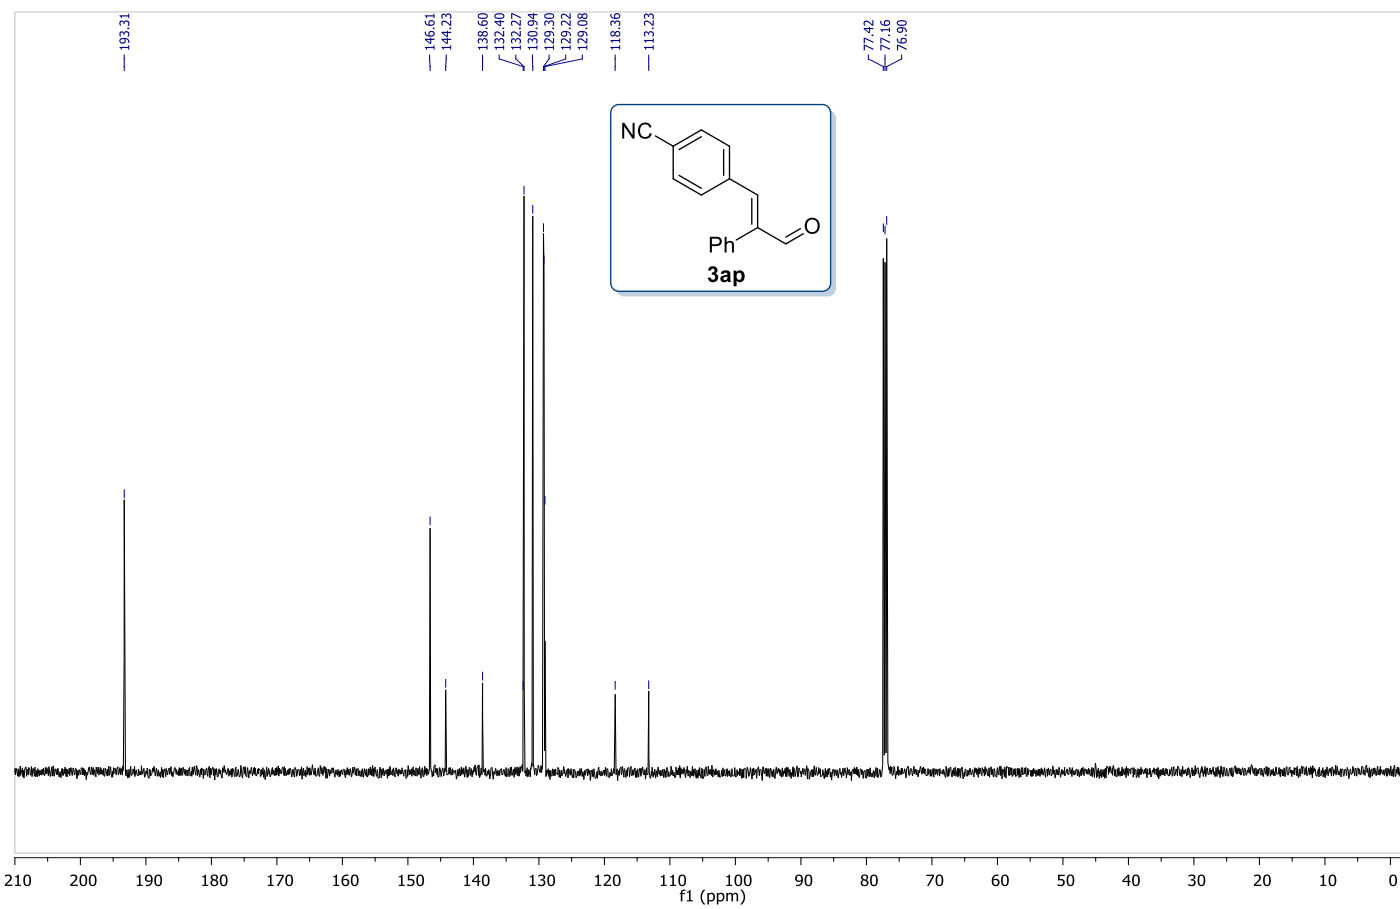

$^1\text{H}$  NMR (600 MHz,  $\text{CDCl}_3$ ) and  $^{13}\text{C}\{^1\text{H}\}$  NMR (151 MHz,  $\text{CDCl}_3$ ), **3aq**

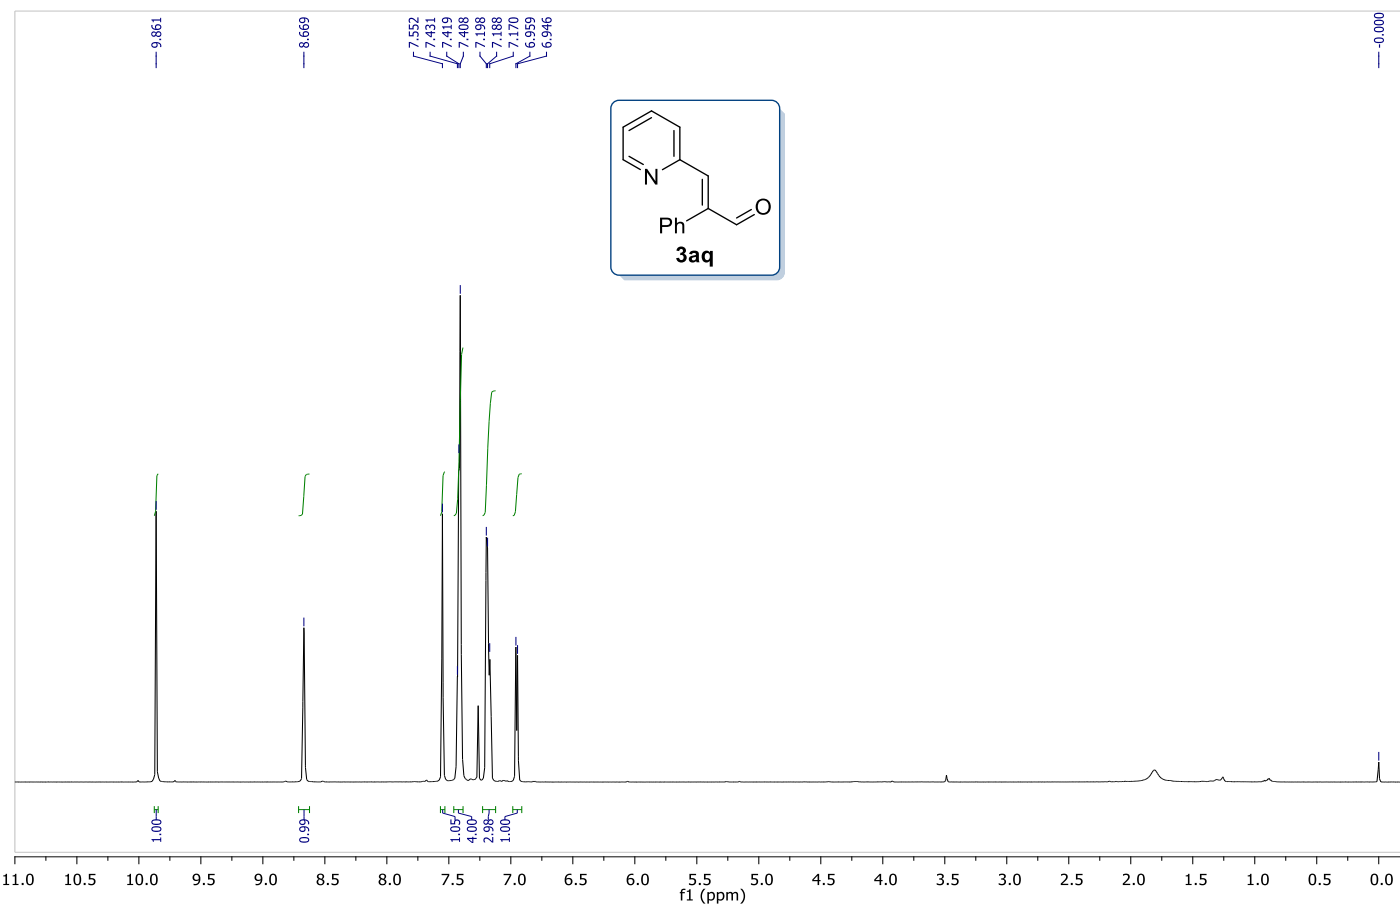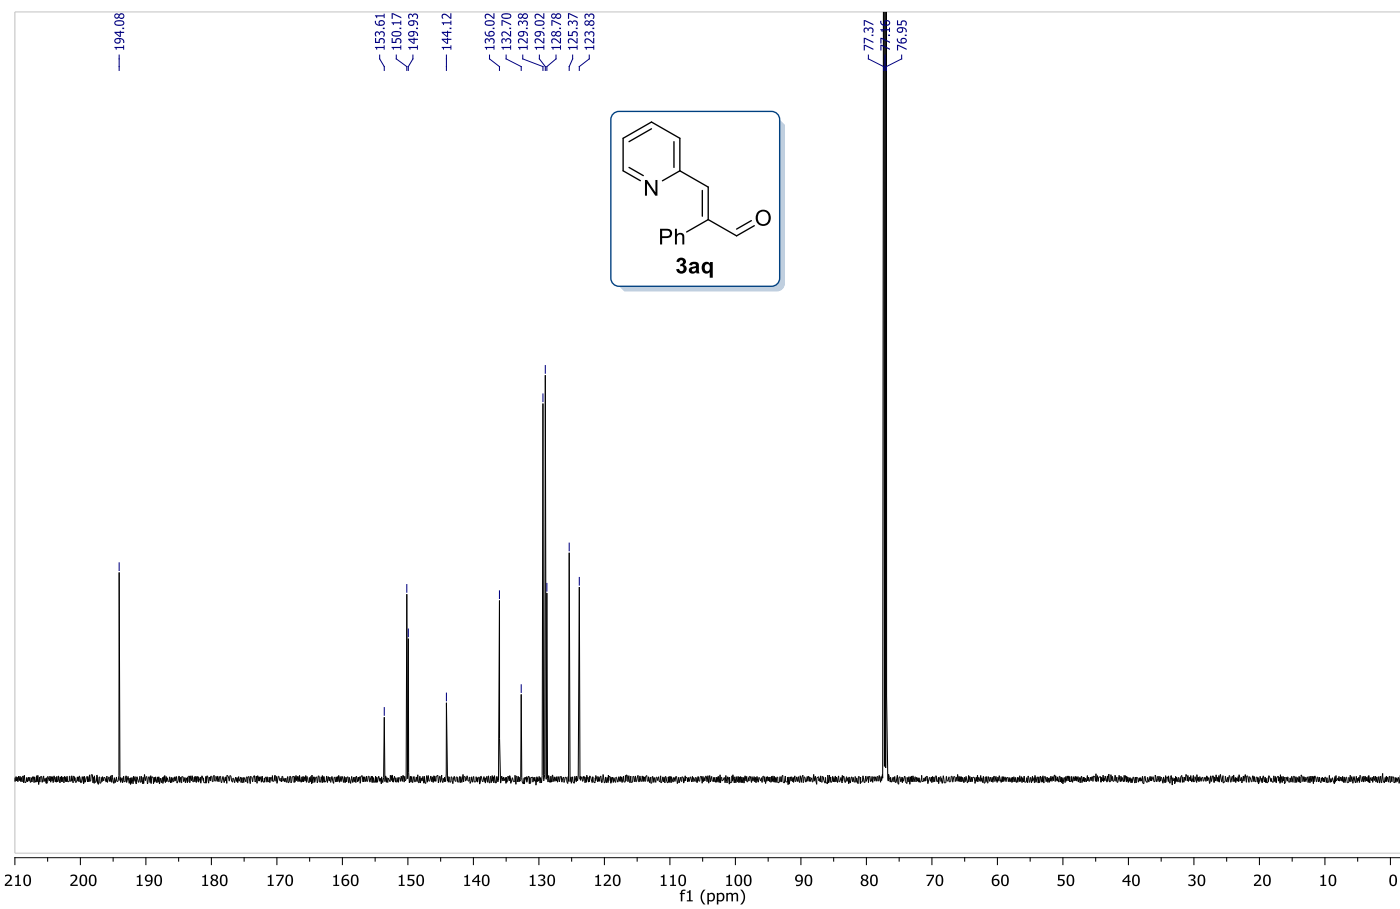

$^1\text{H}$  NMR (500 MHz,  $\text{CDCl}_3$ ) and  $^{13}\text{C}\{^1\text{H}\}$  NMR (126 MHz,  $\text{CDCl}_3$ ), **3ar**

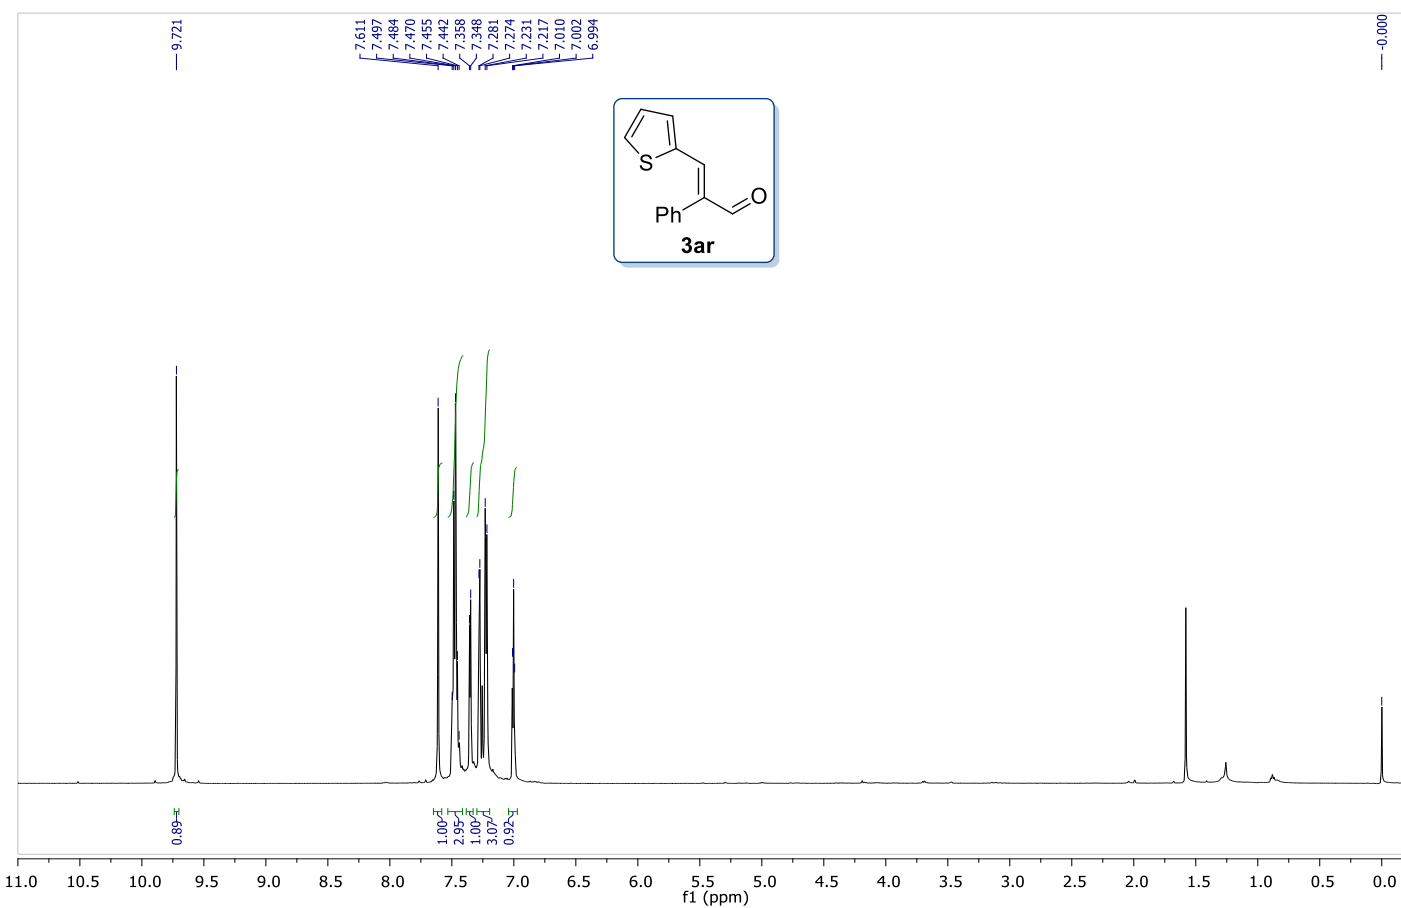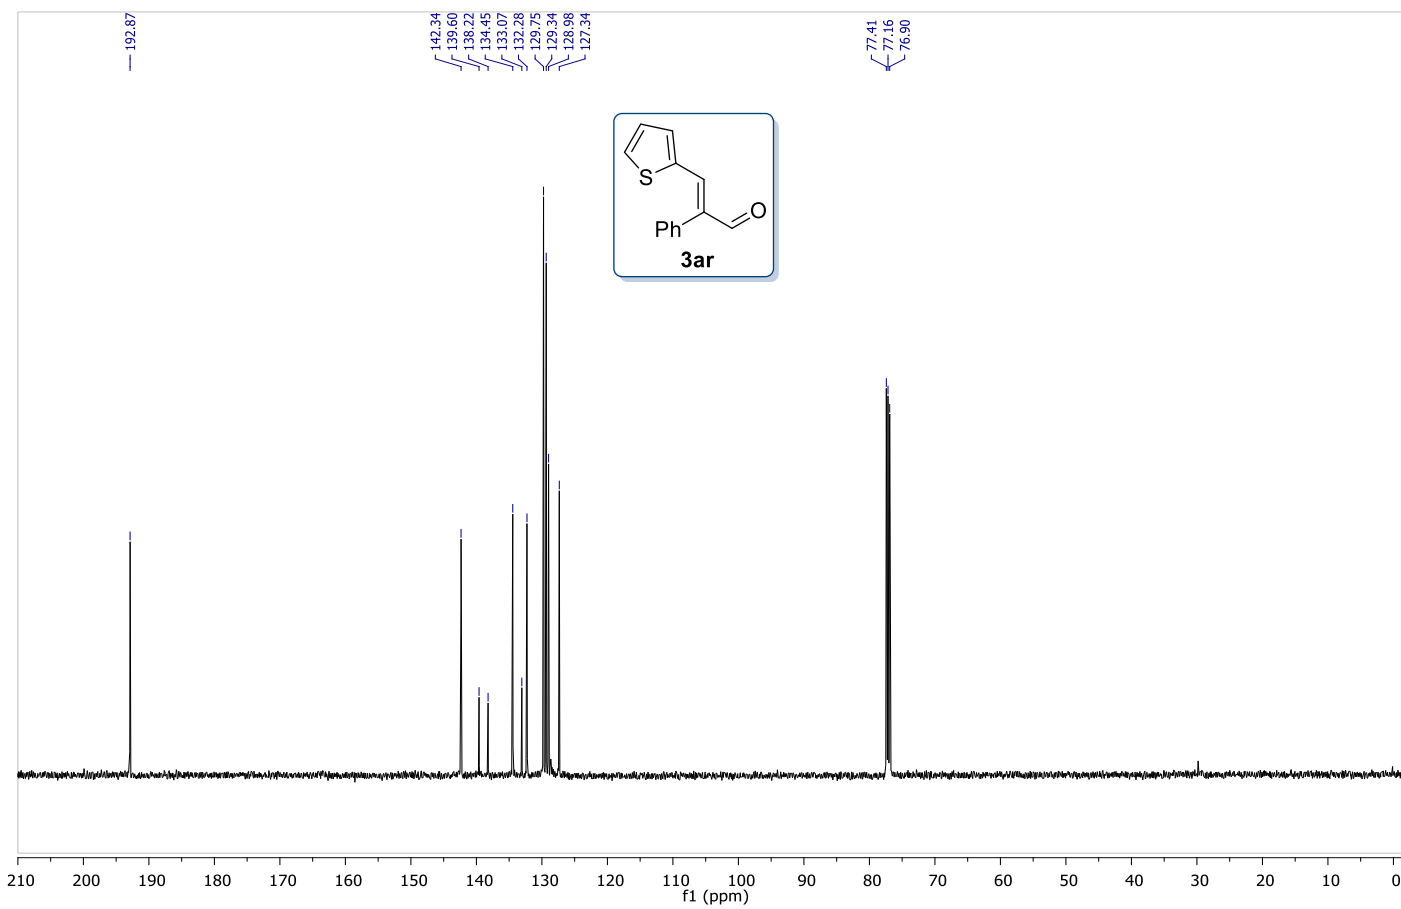

$^1\text{H}$  NMR (600 MHz,  $\text{CDCl}_3$ ) and  $^{13}\text{C}\{^1\text{H}\}$  NMR (151 MHz,  $\text{CDCl}_3$ ), **3as**

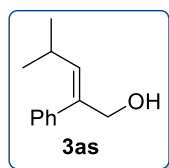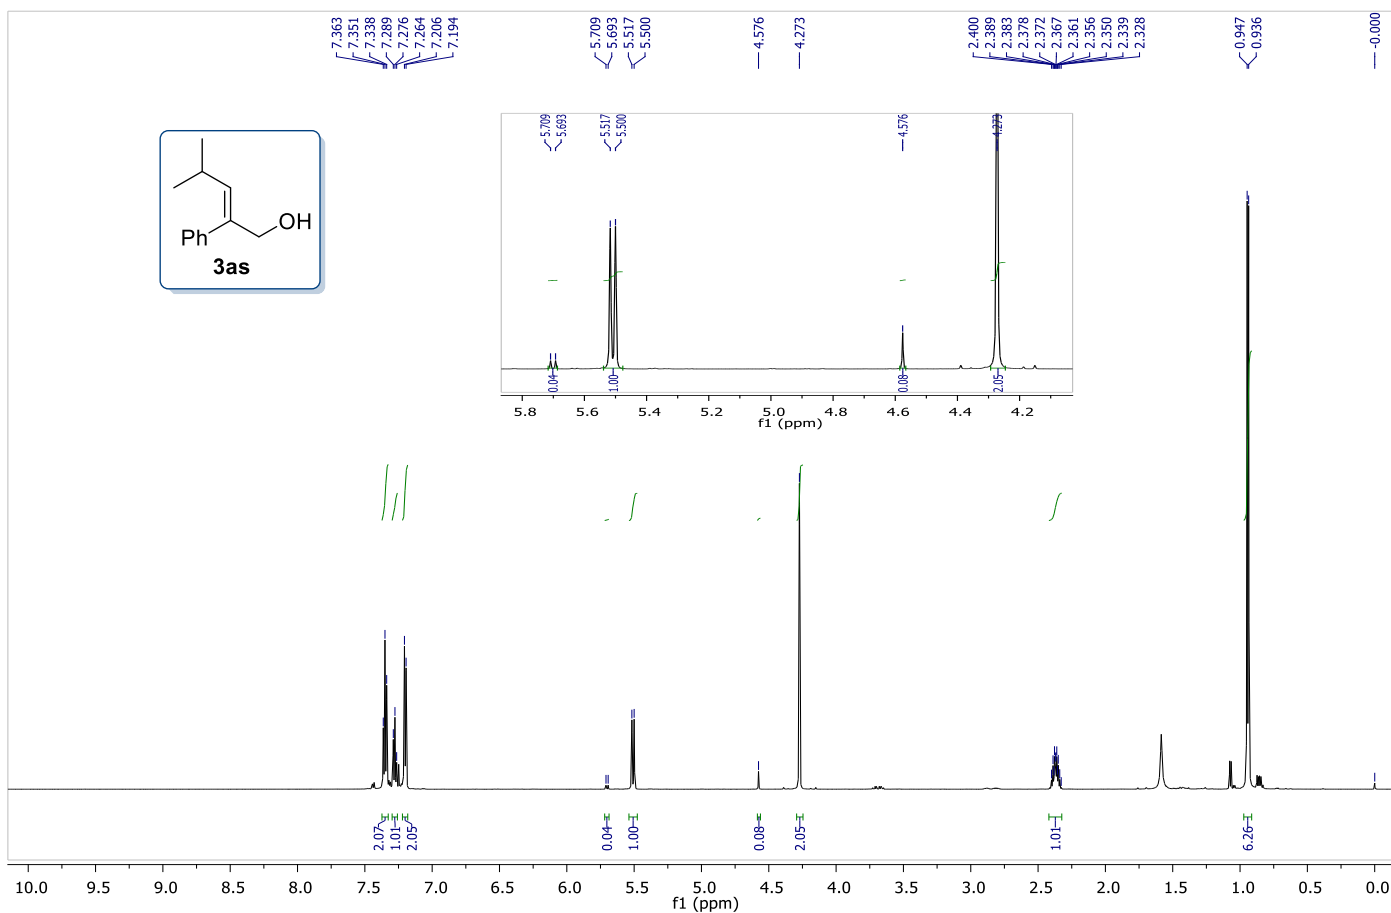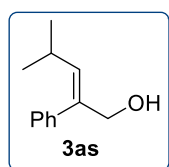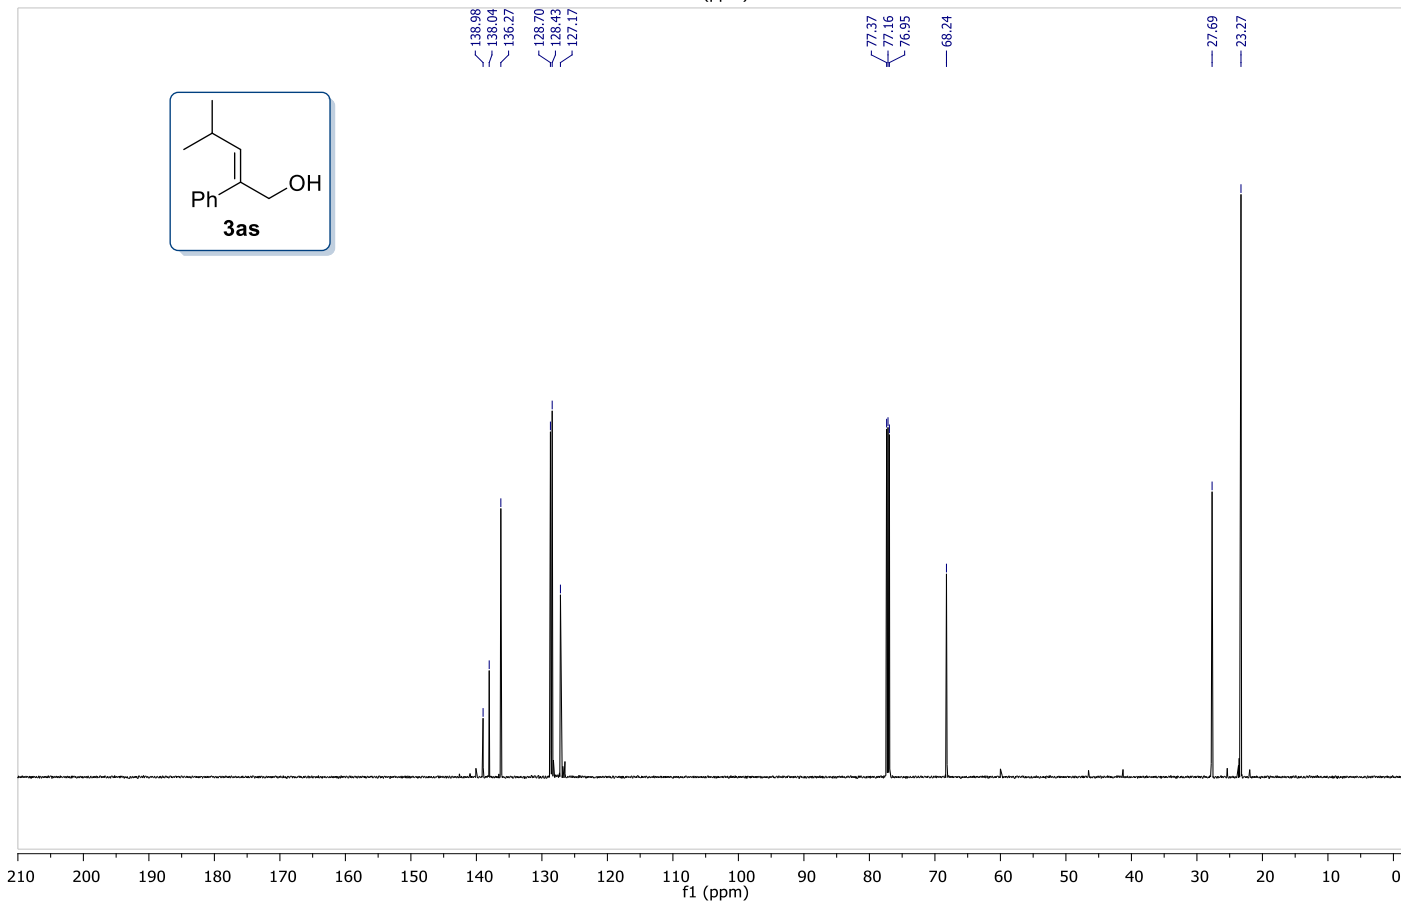

$^1\text{H}$  NMR (600 MHz,  $\text{CDCl}_3$ ) and  $^{13}\text{C}\{^1\text{H}\}$  NMR (151 MHz,  $\text{CDCl}_3$ ), **3at**

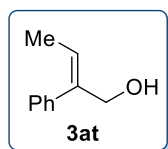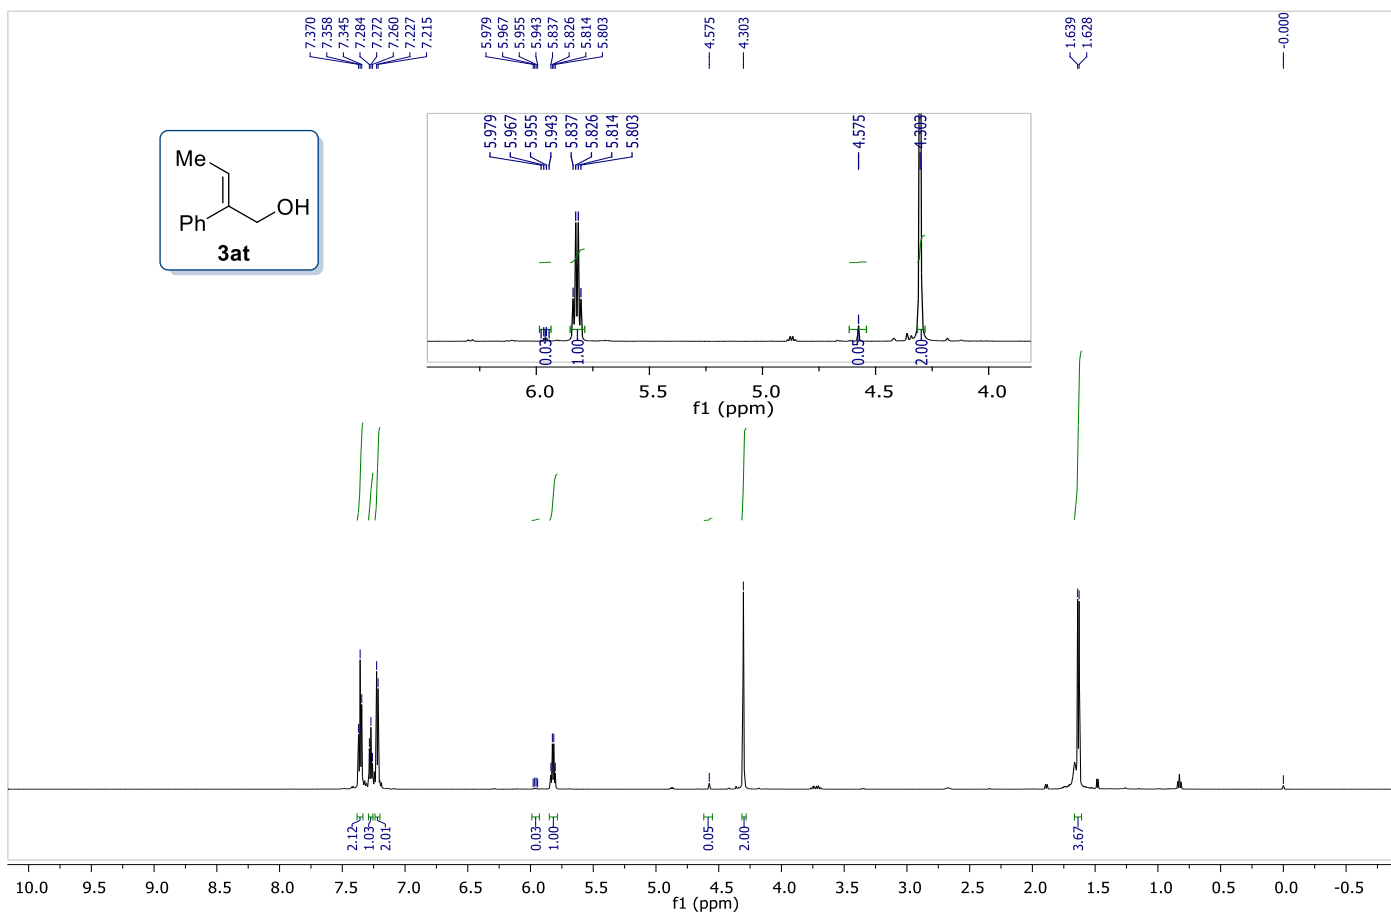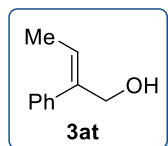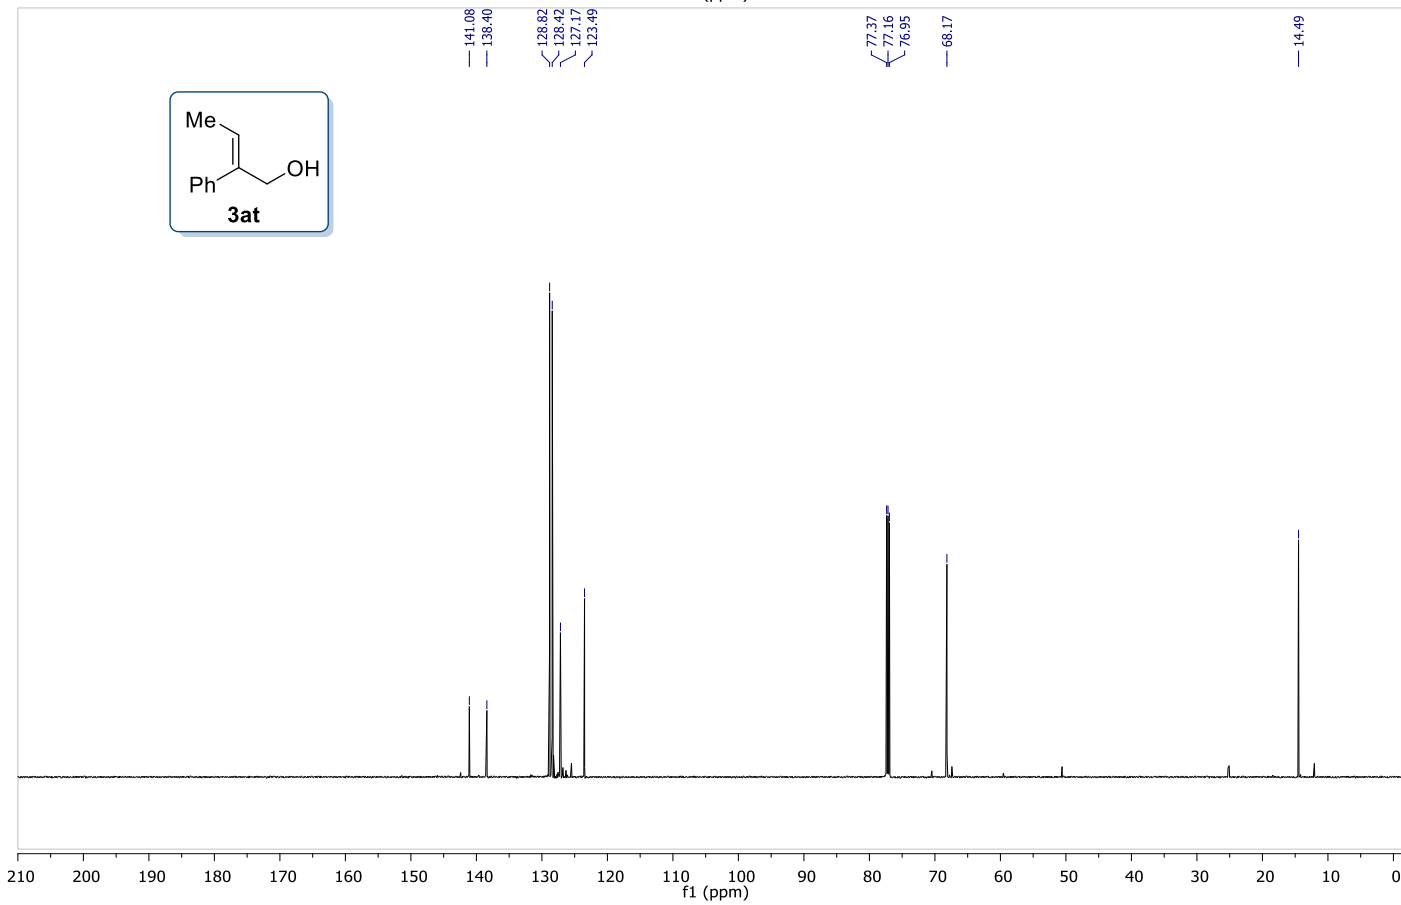

$^1\text{H}$  NMR (600 MHz,  $\text{CDCl}_3$ ) and  $^{13}\text{C}\{^1\text{H}\}$  NMR (151 MHz,  $\text{CDCl}_3$ ), **3au**

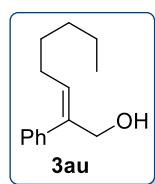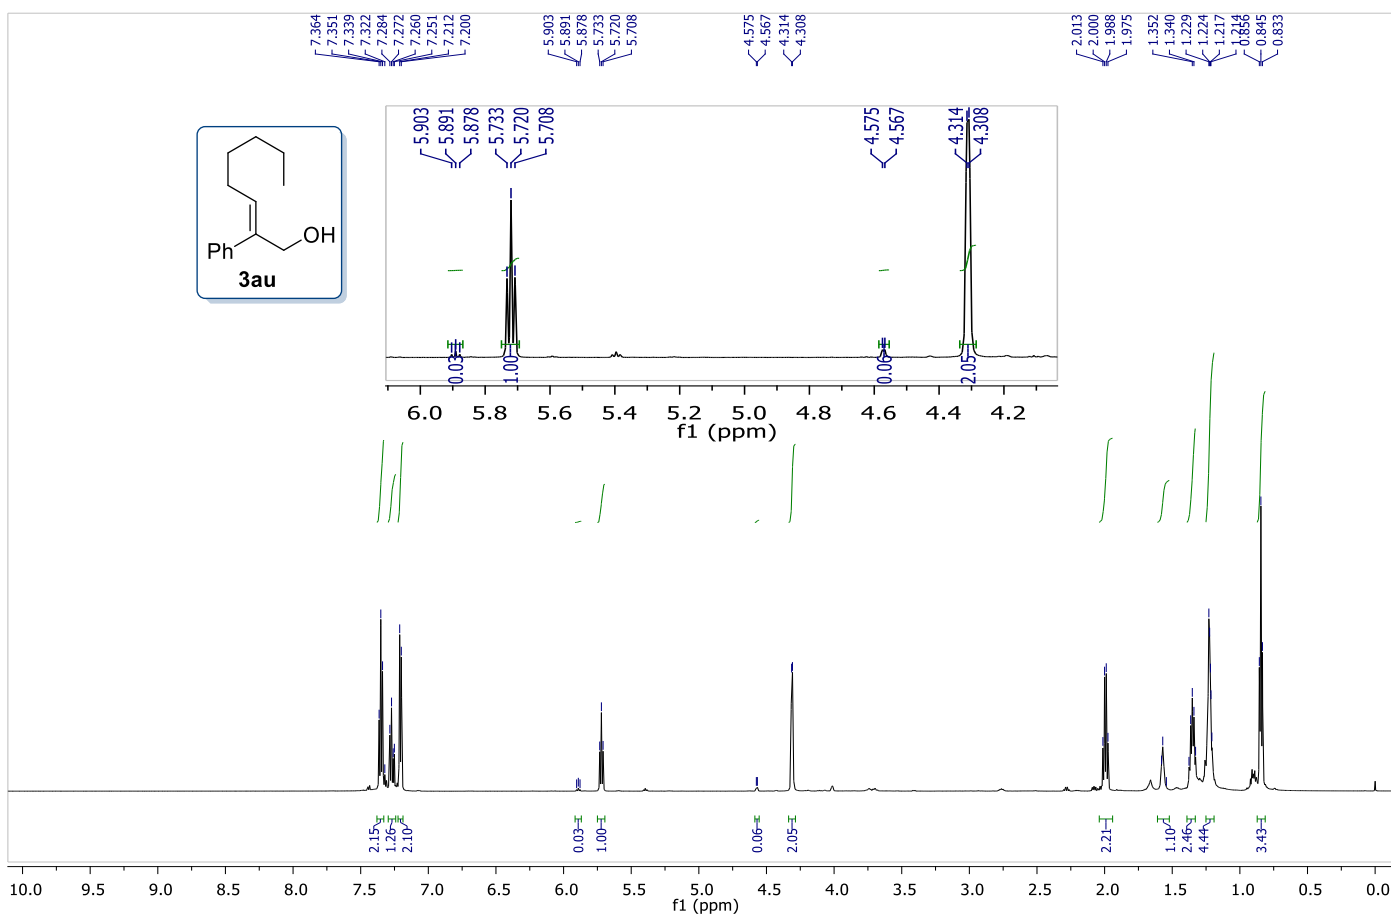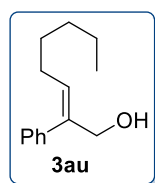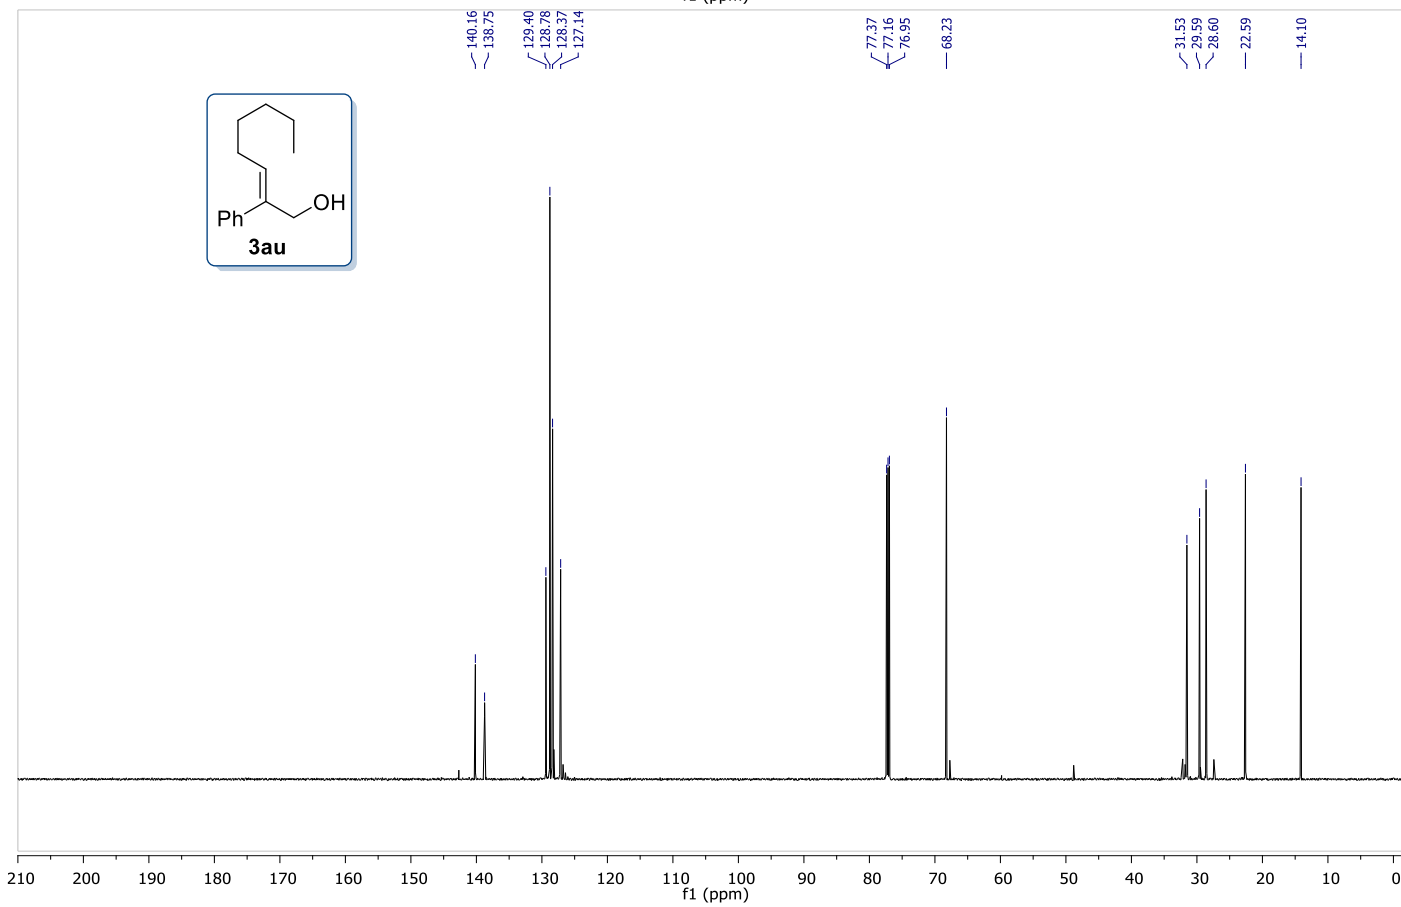

$^1\text{H}$  NMR (500 MHz,  $\text{CDCl}_3$ ) and  $^{13}\text{C}\{^1\text{H}\}$  NMR (126 MHz,  $\text{CDCl}_3$ ), **3ba**

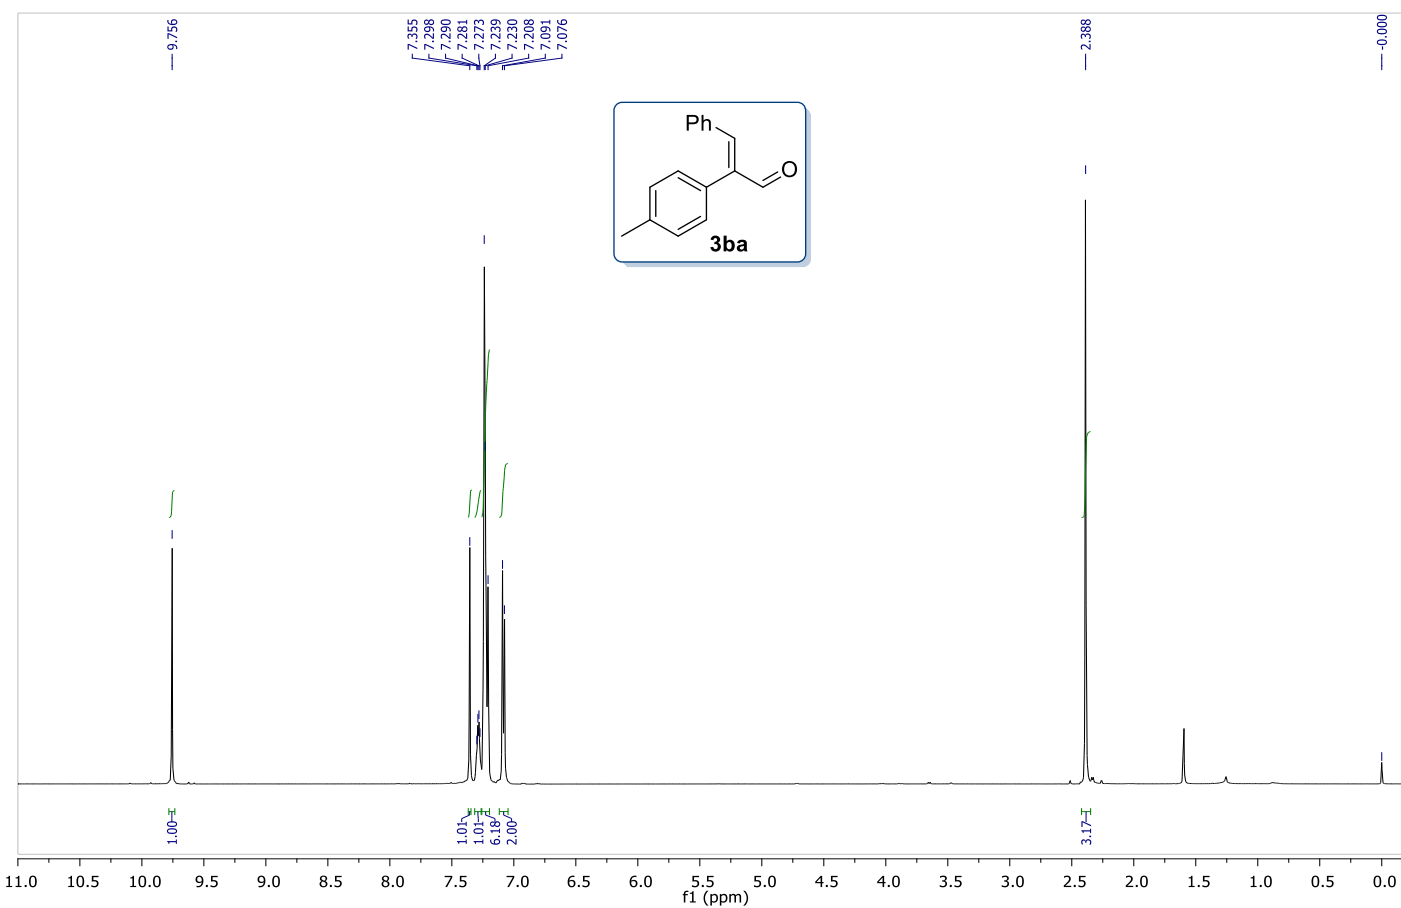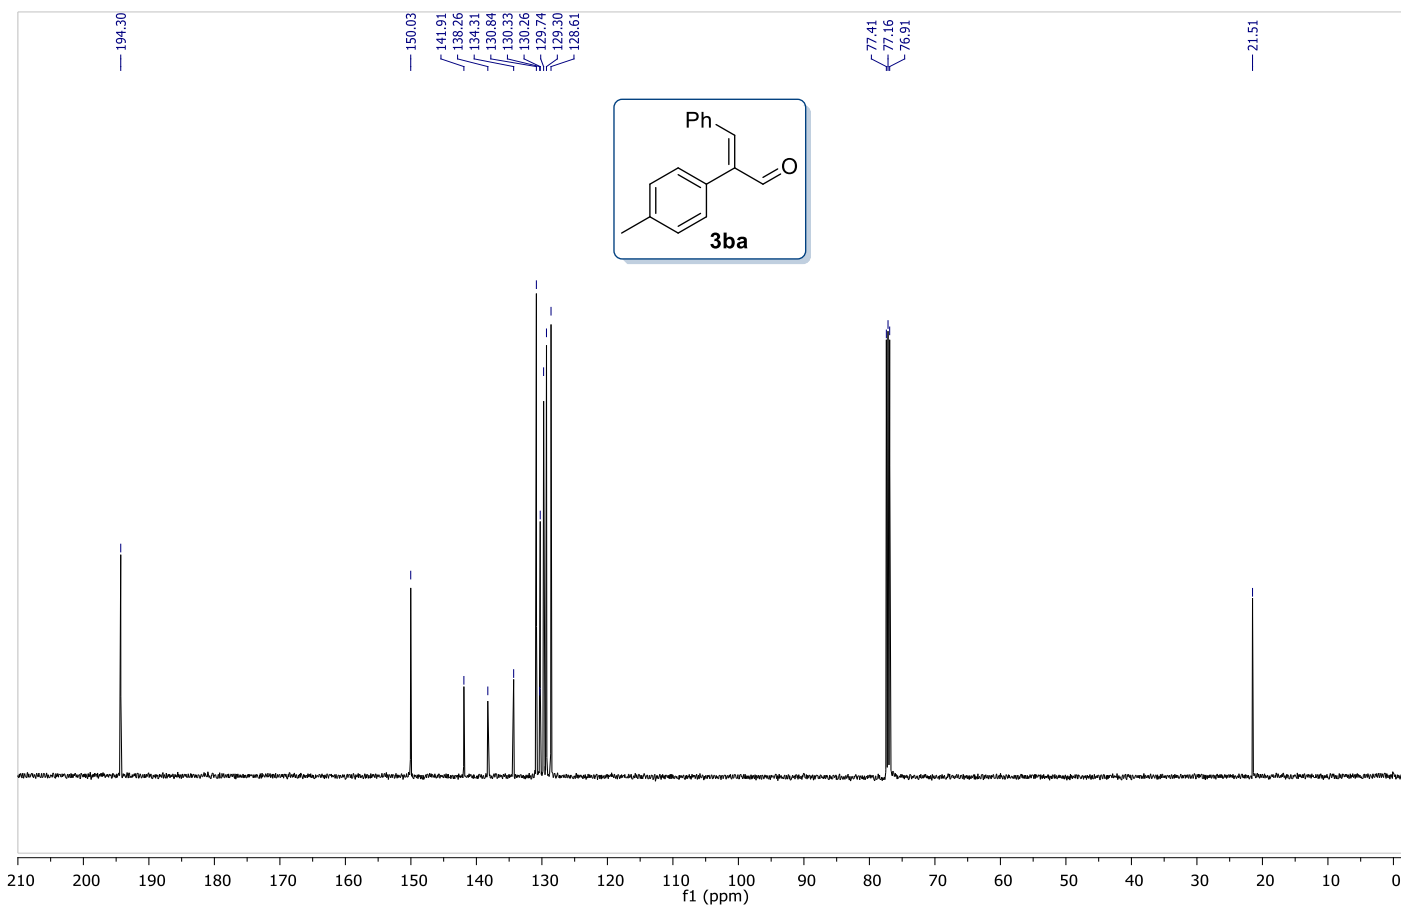

$^1\text{H}$  NMR (500 MHz,  $\text{CDCl}_3$ ) and  $^{13}\text{C}\{^1\text{H}\}$  NMR (126 MHz,  $\text{CDCl}_3$ ), **3ca**

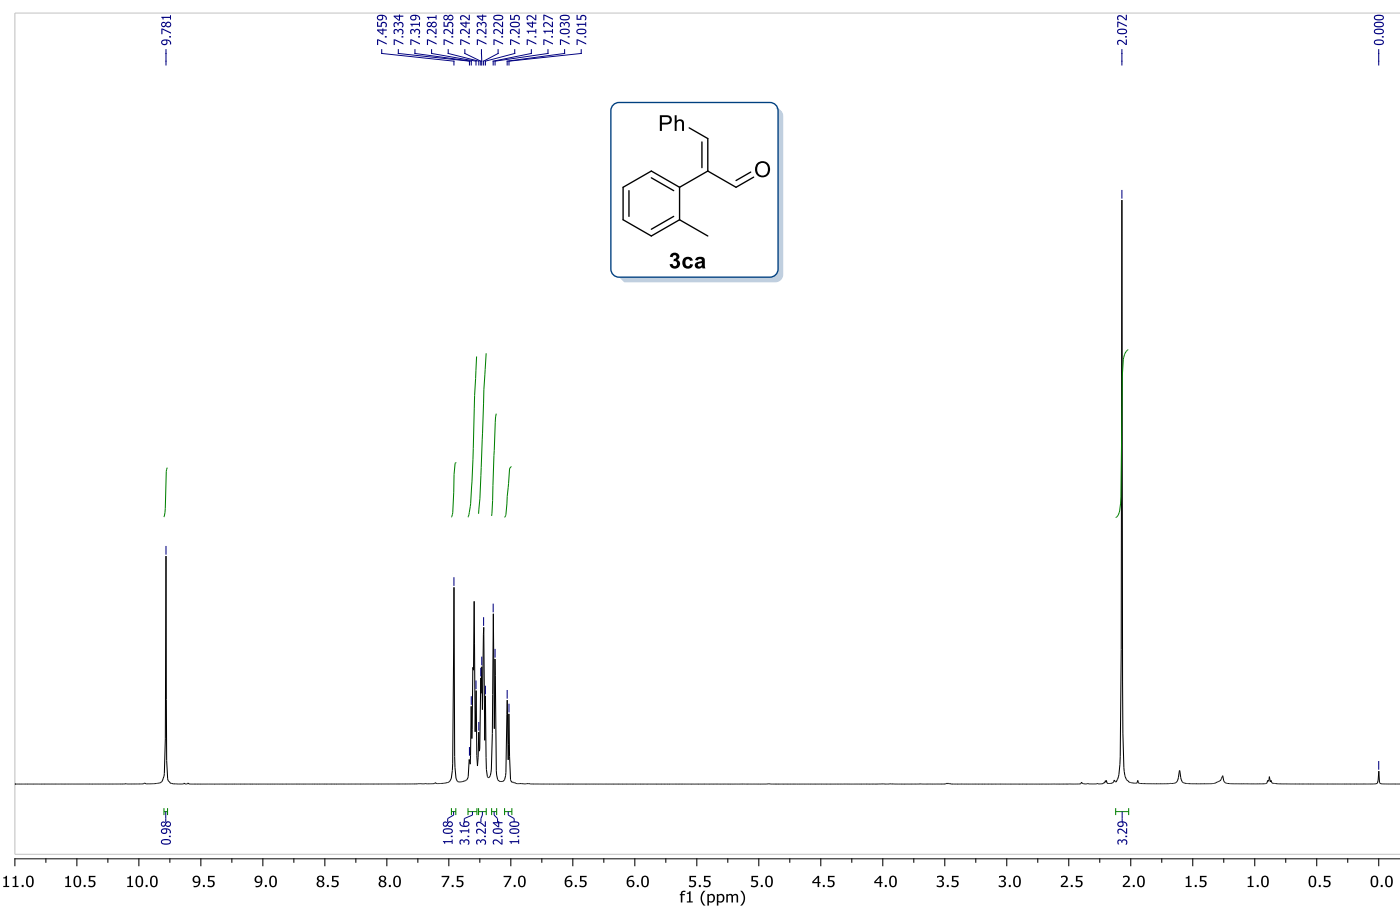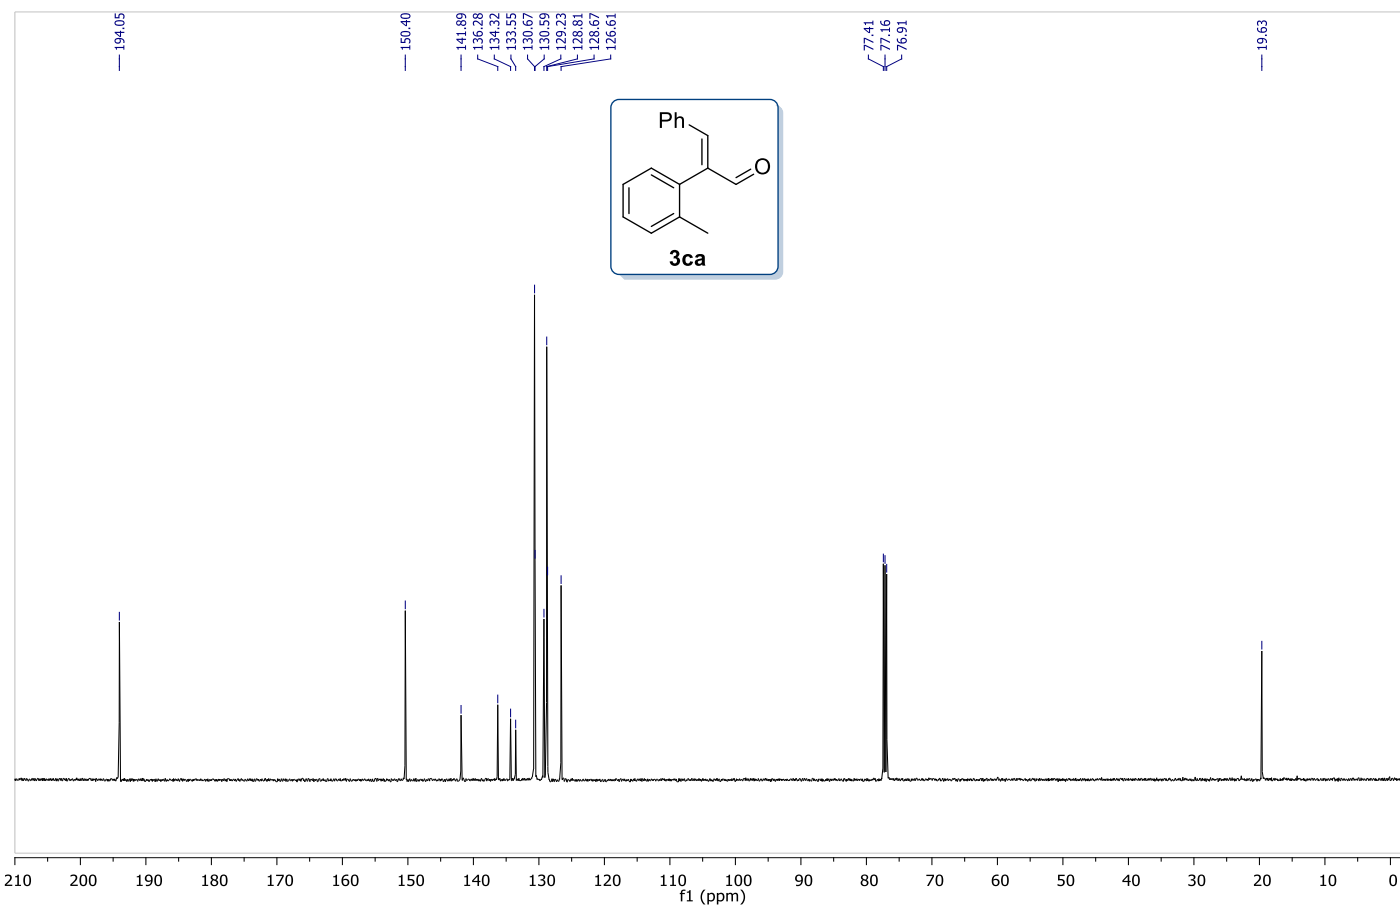

$^1\text{H}$  NMR (600 MHz,  $\text{CDCl}_3$ ) and  $^{13}\text{C}\{^1\text{H}\}$  NMR (151 MHz,  $\text{CDCl}_3$ ), **3da**

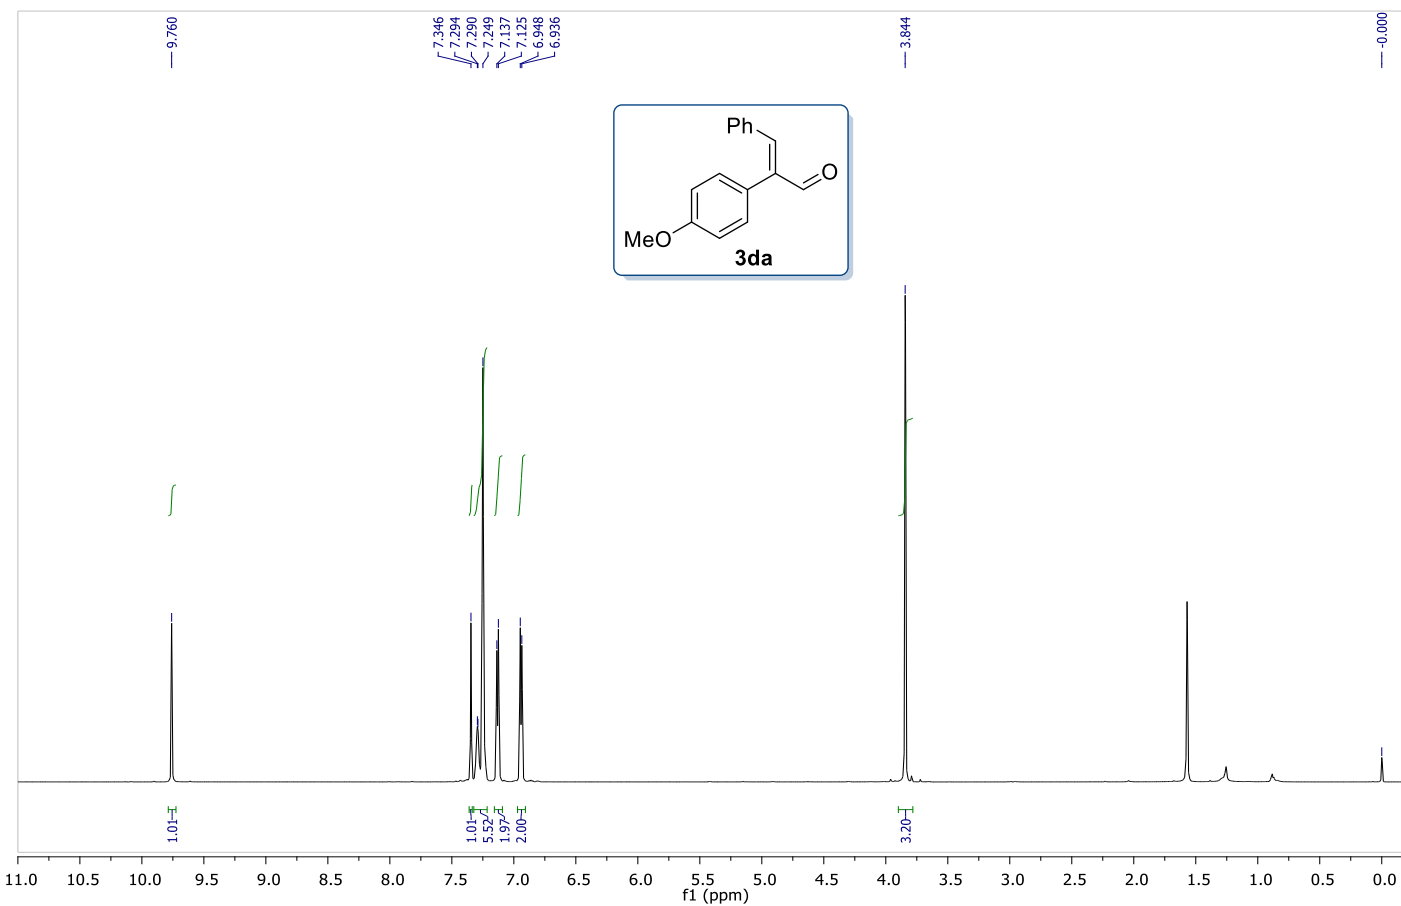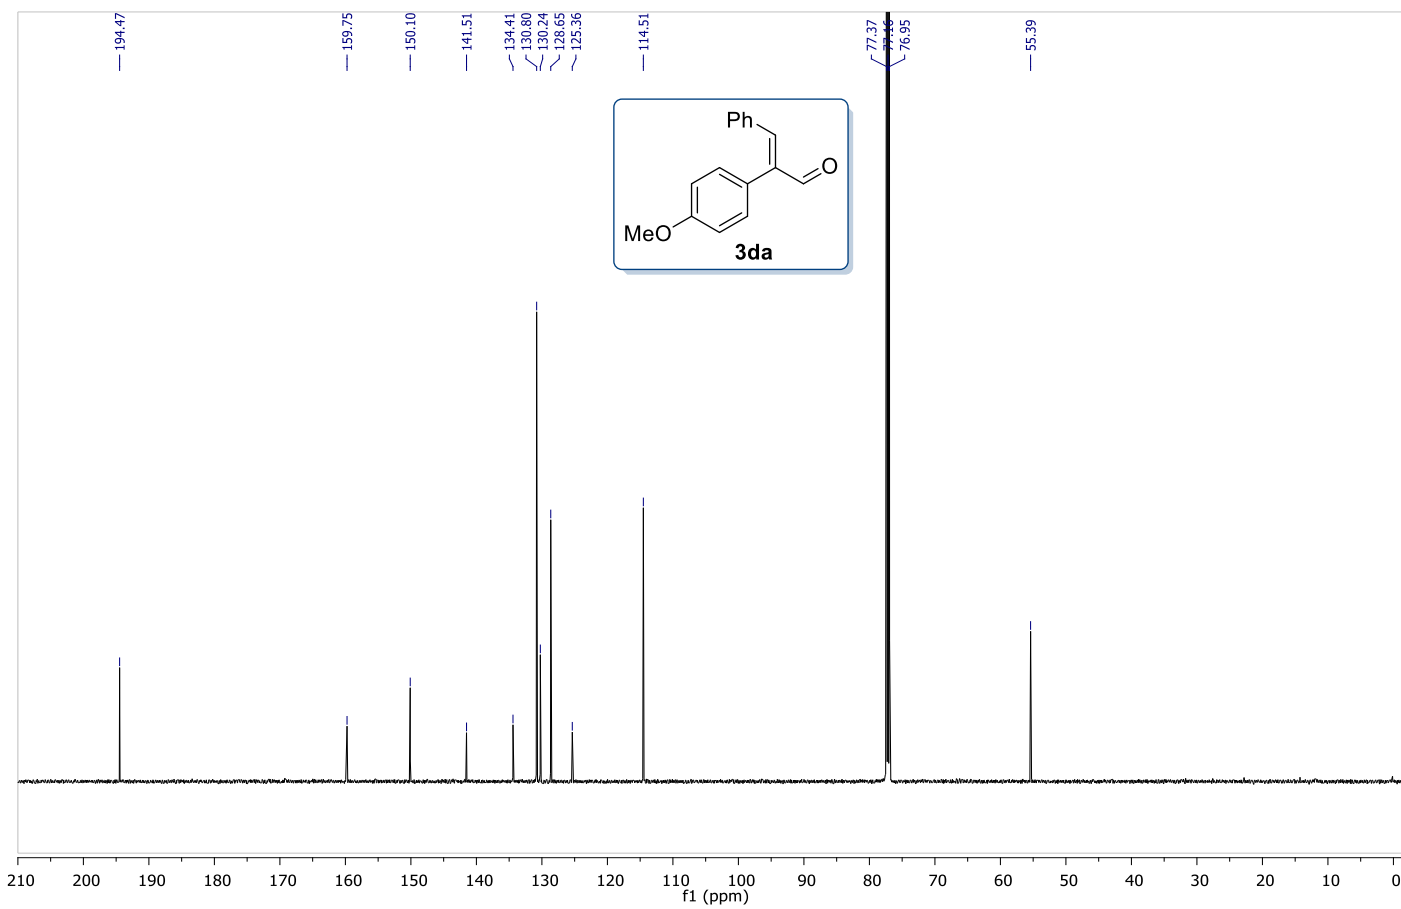

$^1\text{H}$  NMR (500 MHz,  $\text{CDCl}_3$ ) and  $^{13}\text{C}\{^1\text{H}\}$  NMR (126 MHz,  $\text{CDCl}_3$ ), **3ea**

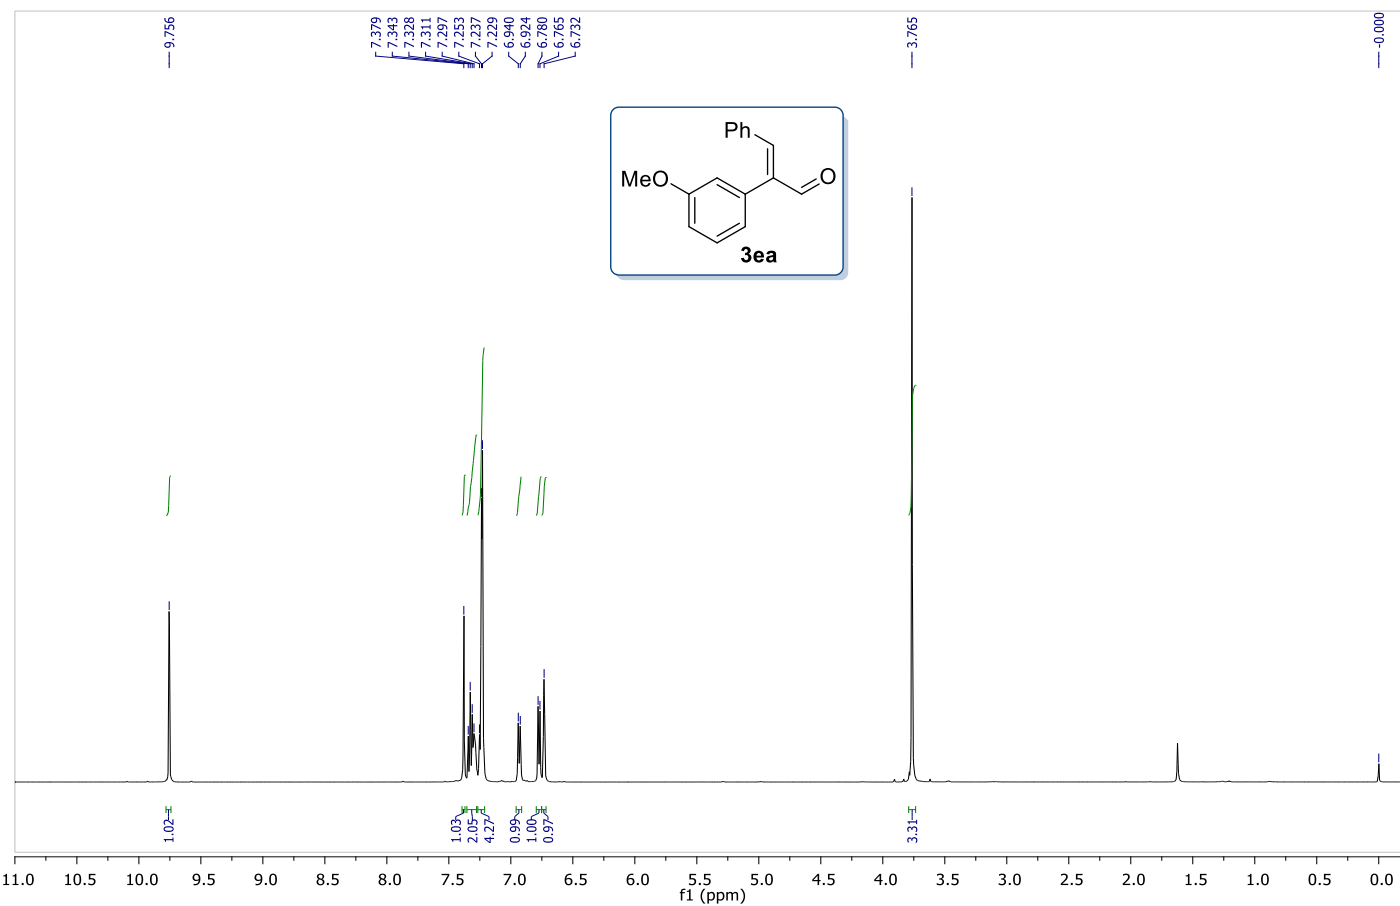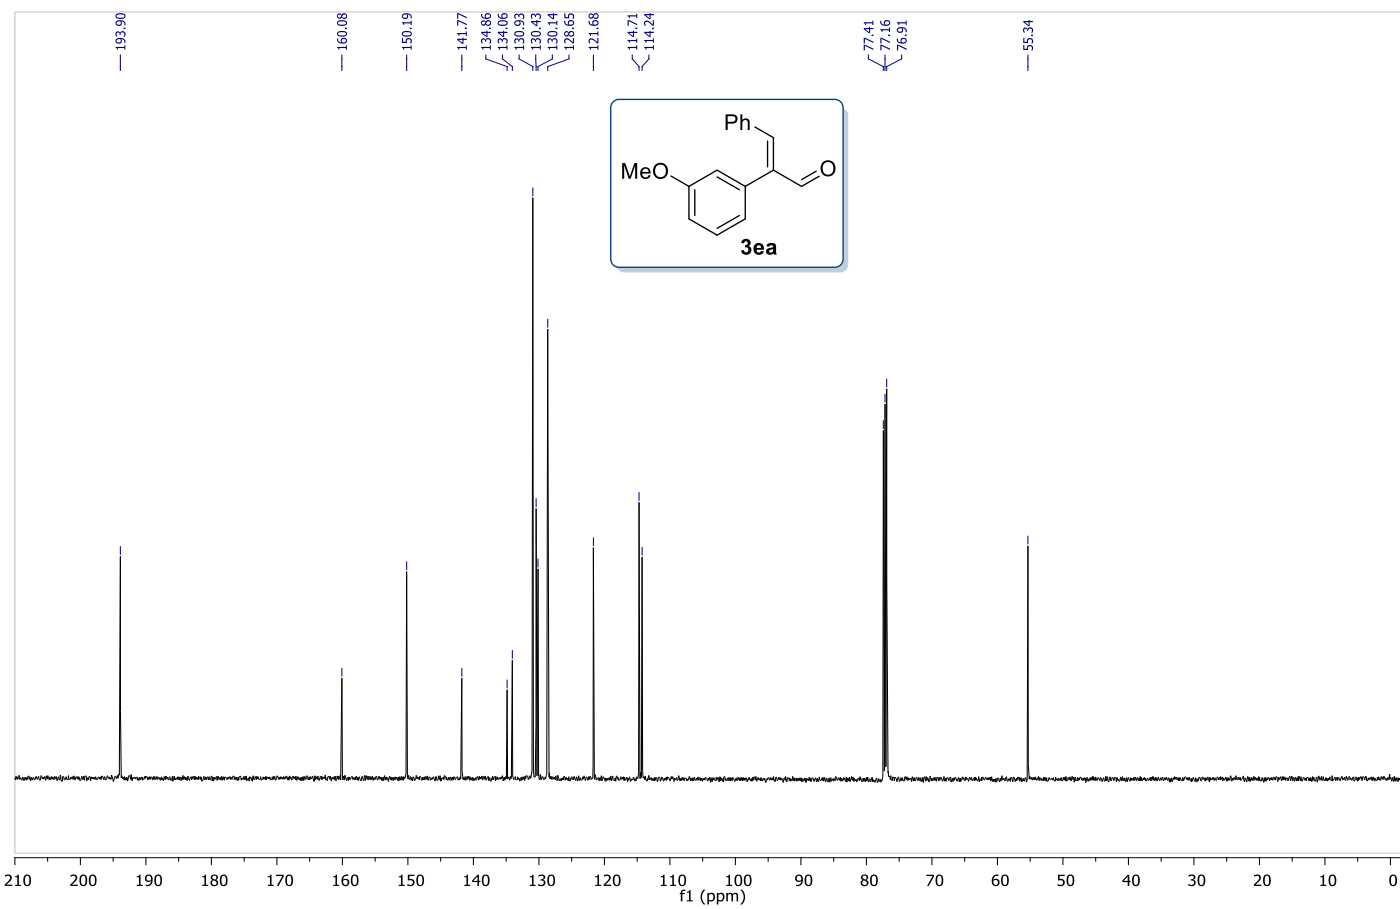

$^1\text{H}$  NMR (500 MHz,  $\text{CDCl}_3$ ) and  $^{13}\text{C}\{^1\text{H}\}$  NMR (126 MHz,  $\text{CDCl}_3$ ), **3fa**

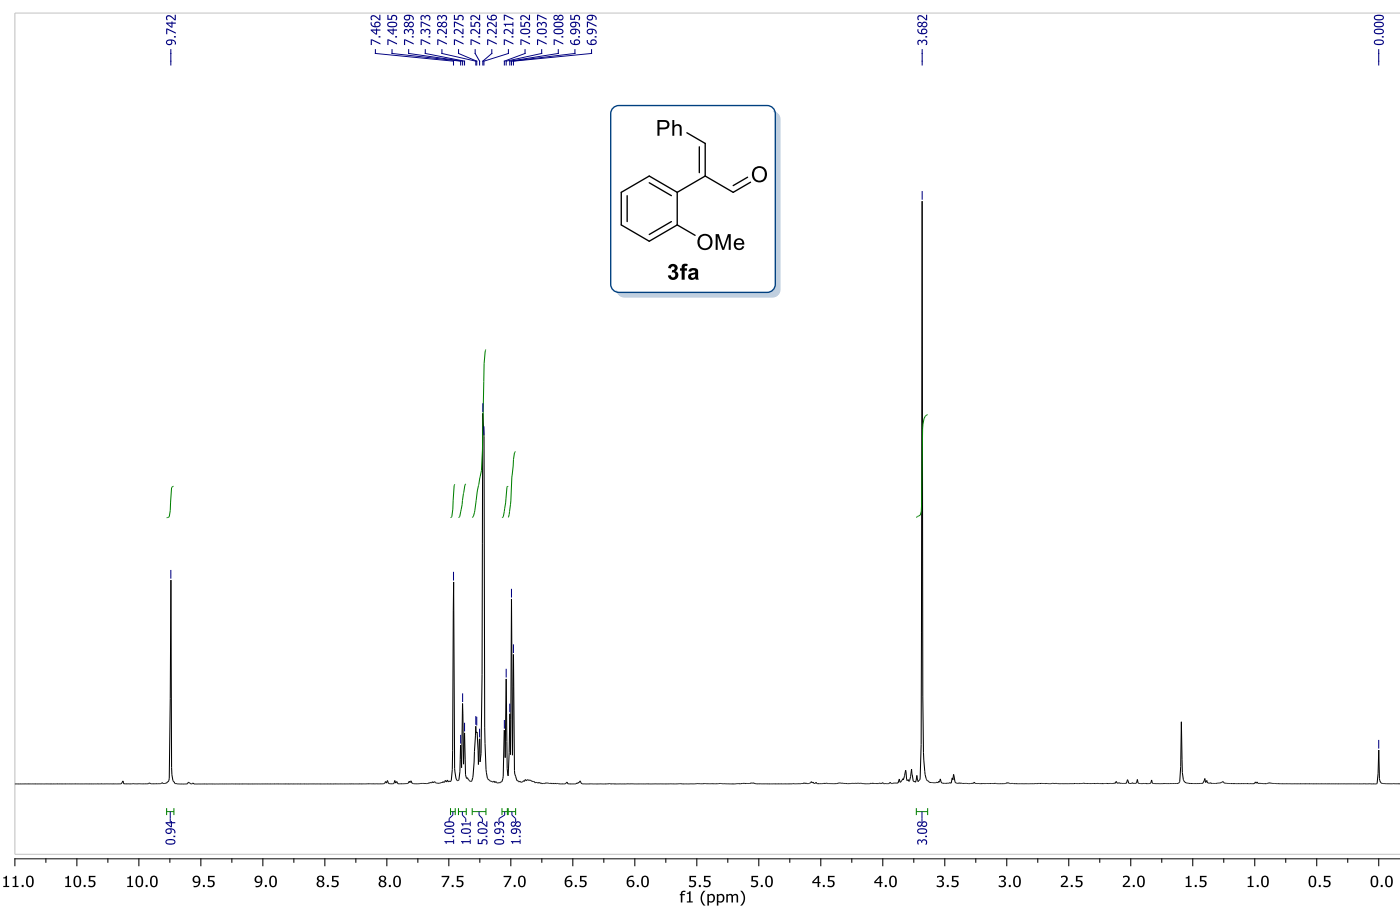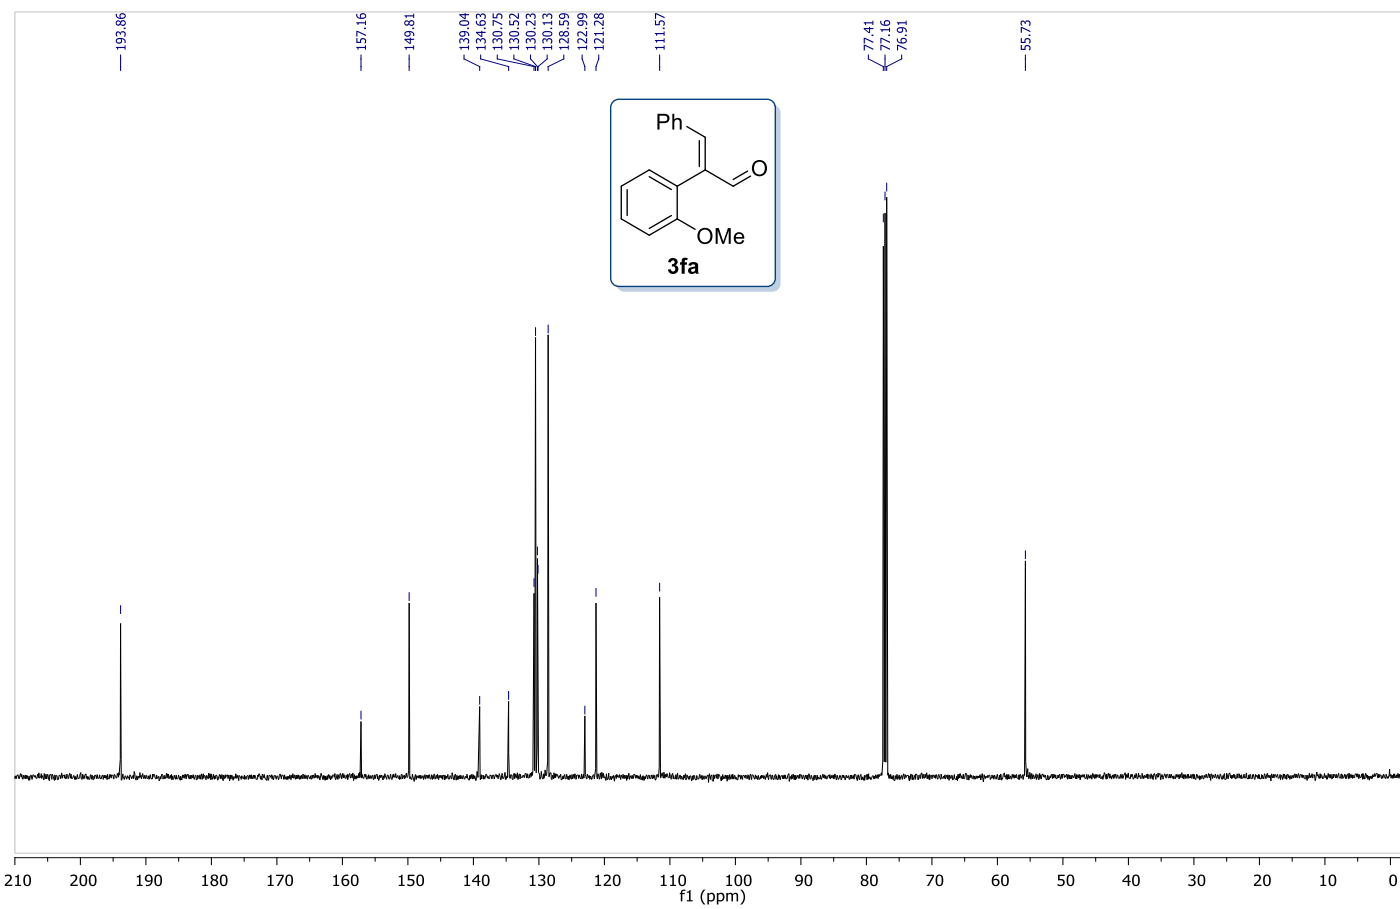

$^1\text{H}$  NMR (500 MHz,  $\text{CDCl}_3$ ) and  $^{13}\text{C}\{^1\text{H}\}$  NMR (126 MHz,  $\text{CDCl}_3$ ), **3ga**

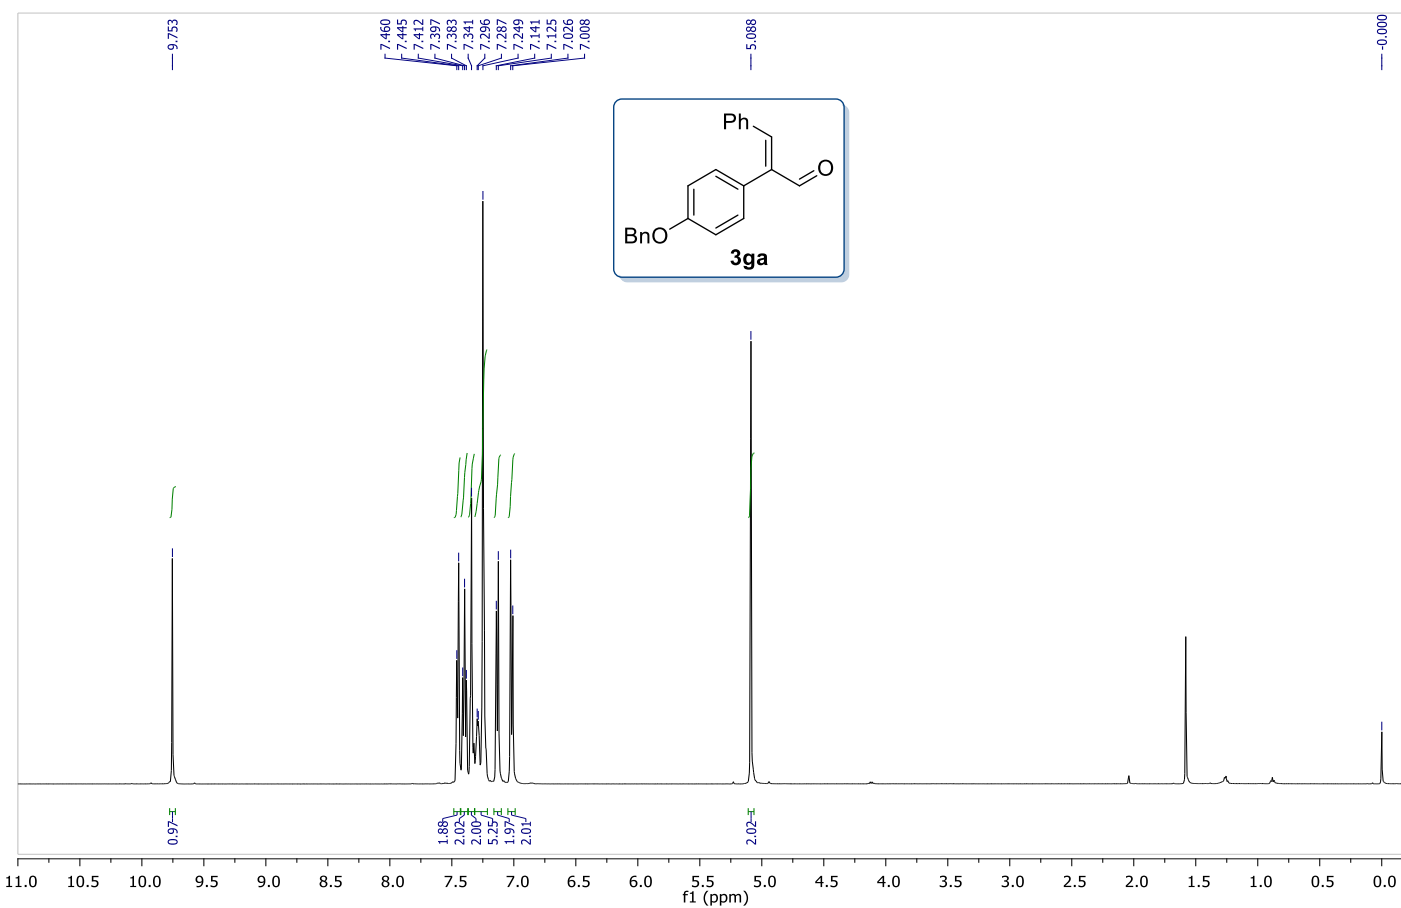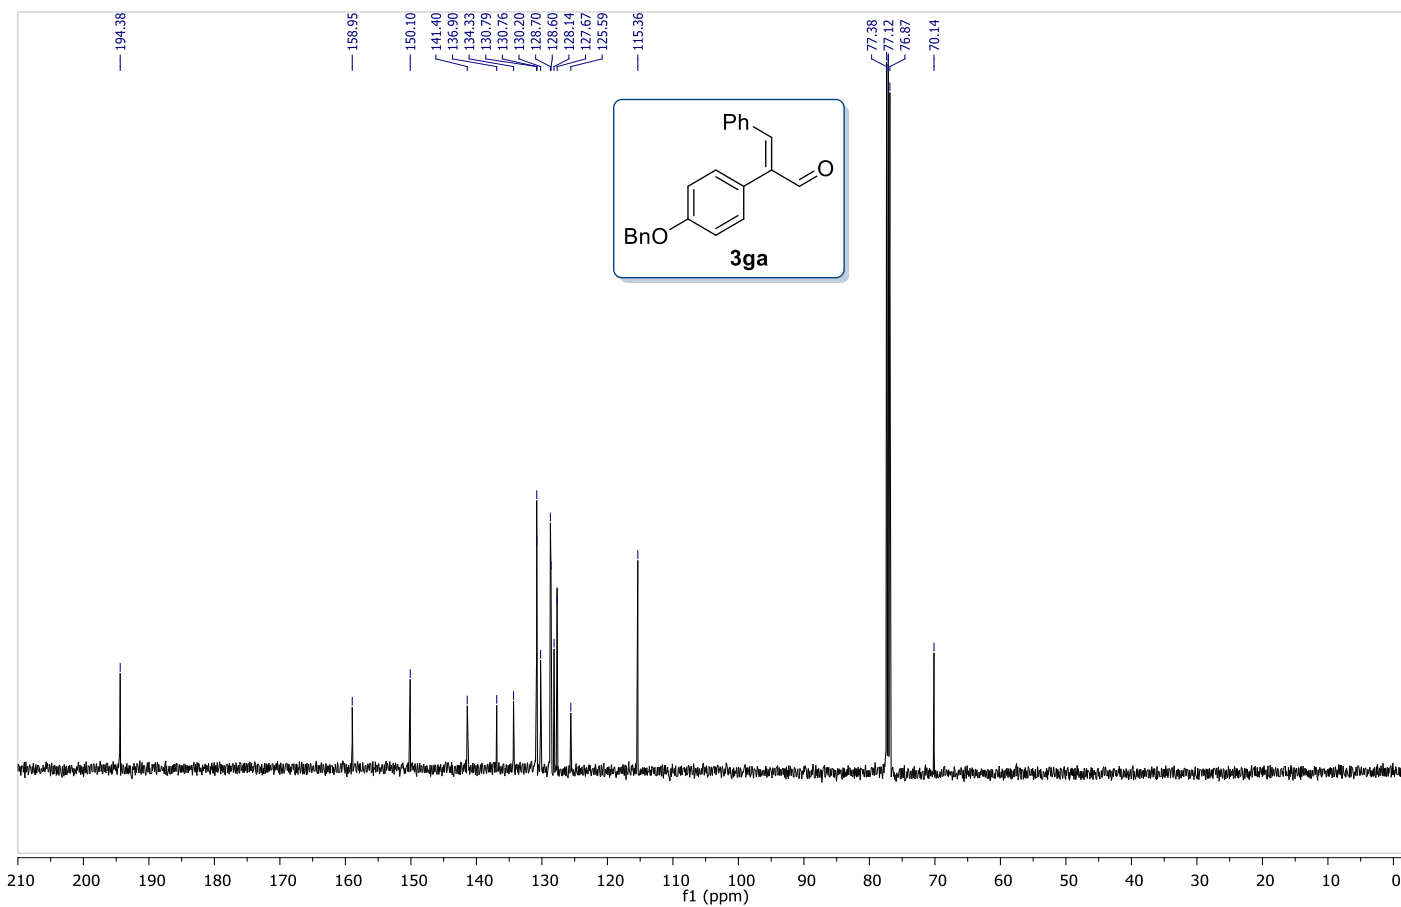

$^1\text{H}$  NMR (500 MHz,  $\text{CDCl}_3$ ) and  $^{13}\text{C}\{^1\text{H}\}$  NMR (126 MHz,  $\text{CDCl}_3$ ), **3ha**

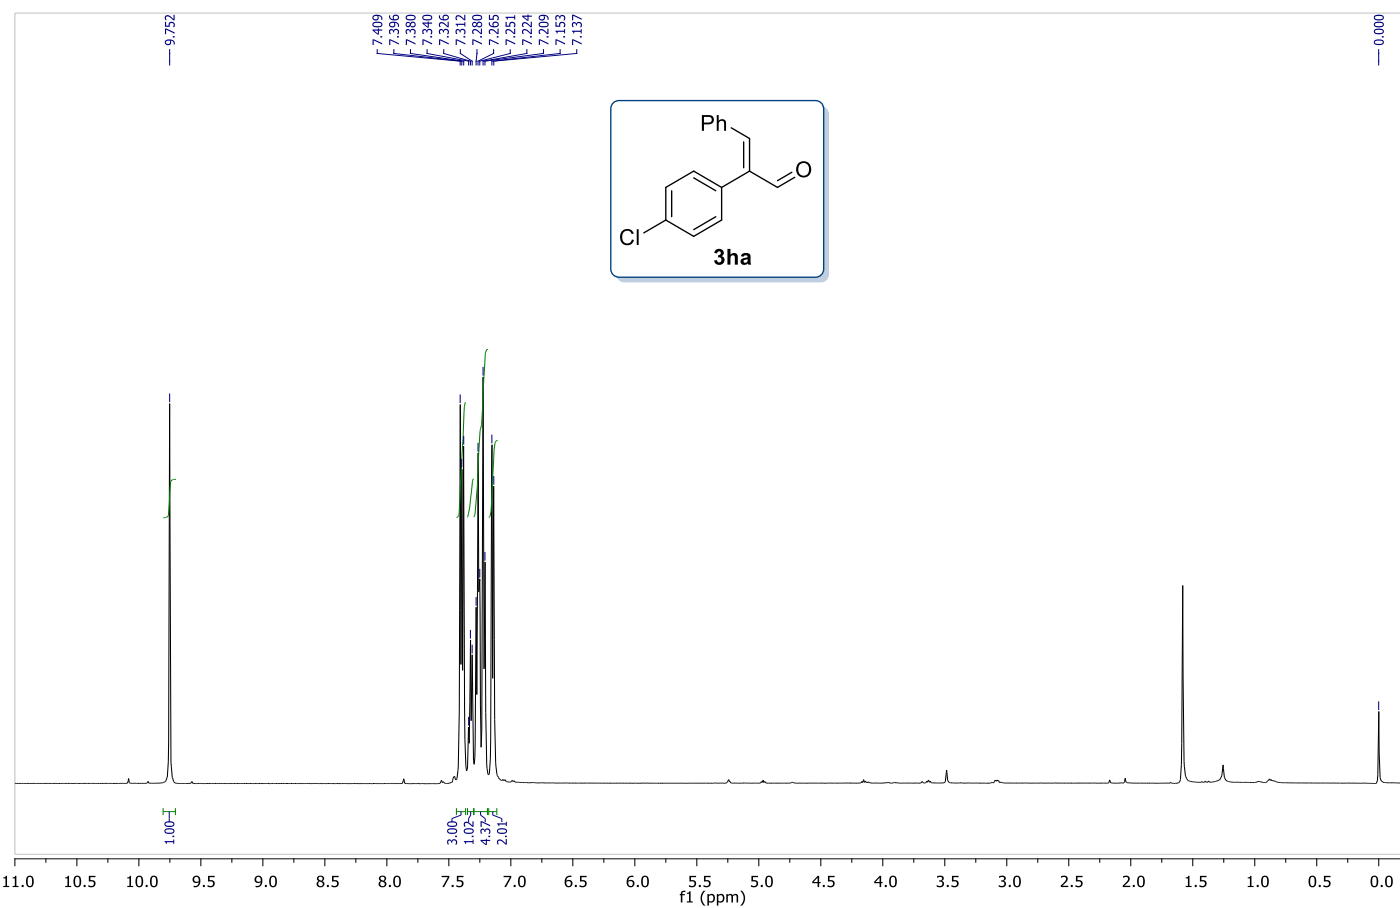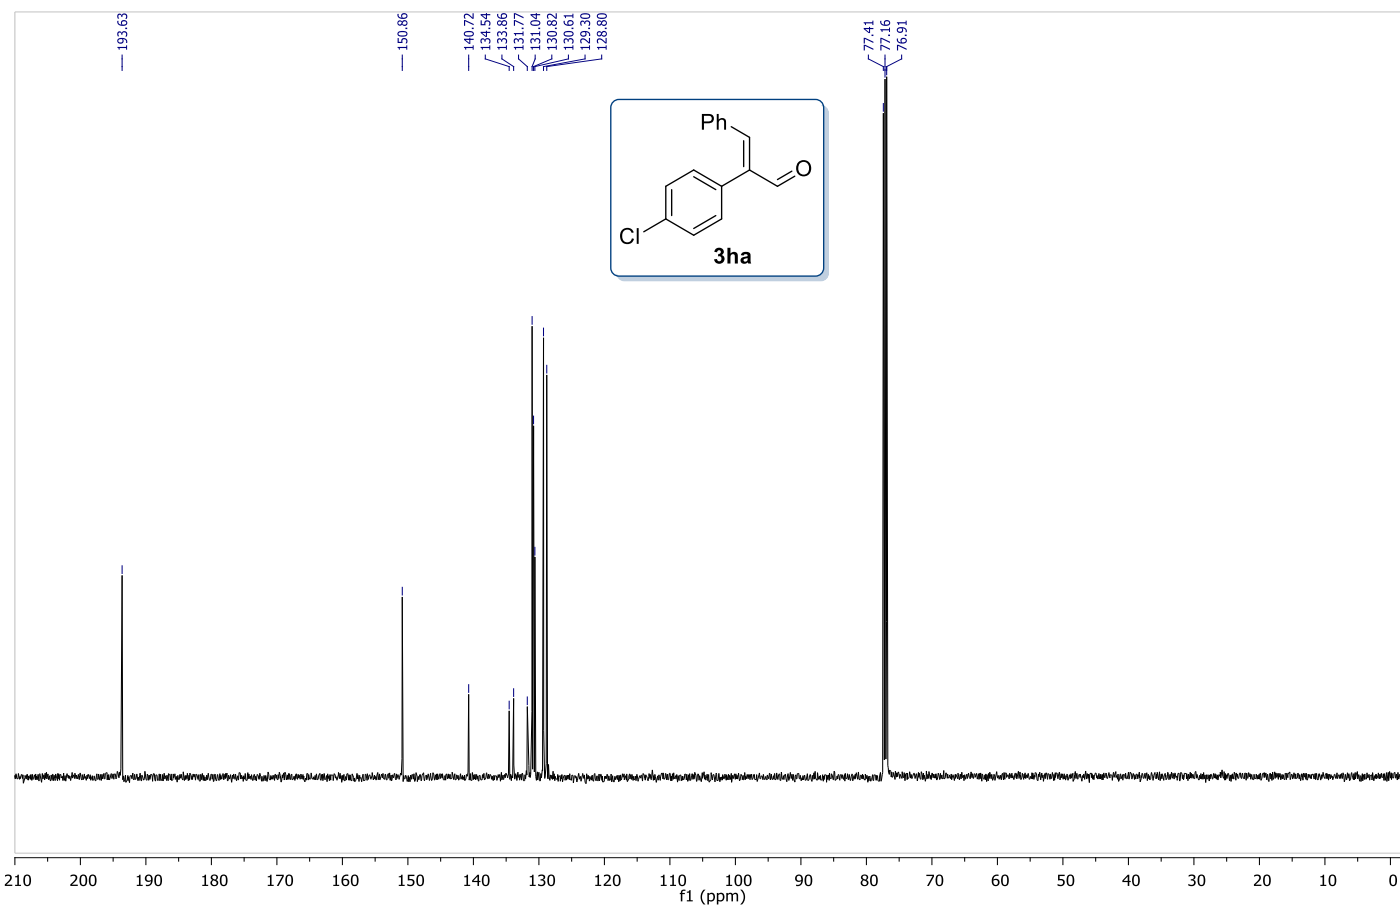

$^1\text{H}$  NMR (600 MHz,  $\text{CDCl}_3$ ) and  $^{13}\text{C}\{^1\text{H}\}$  NMR (151 MHz,  $\text{CDCl}_3$ ), **3ia**

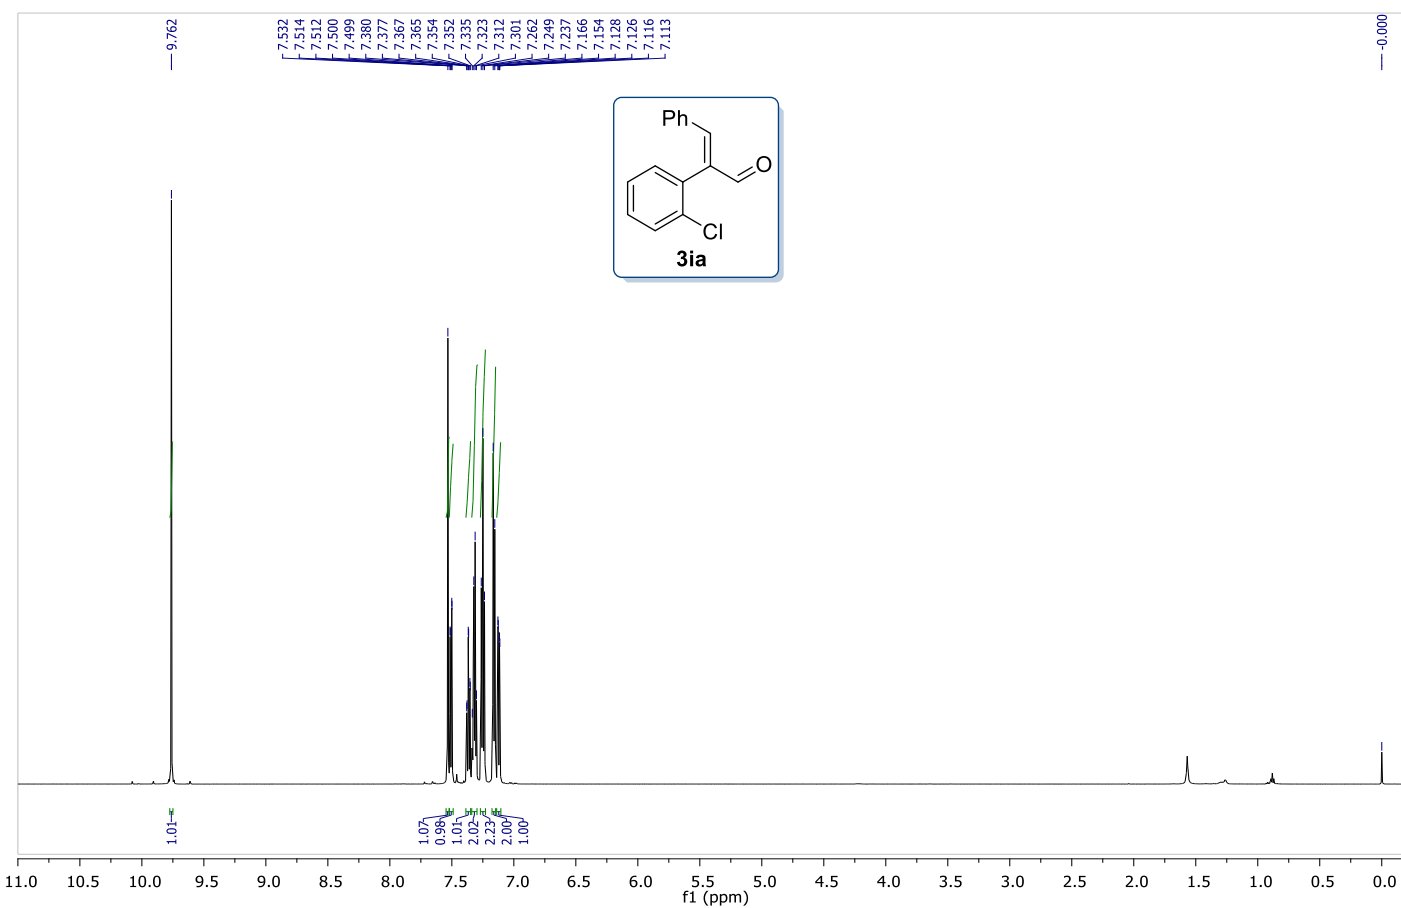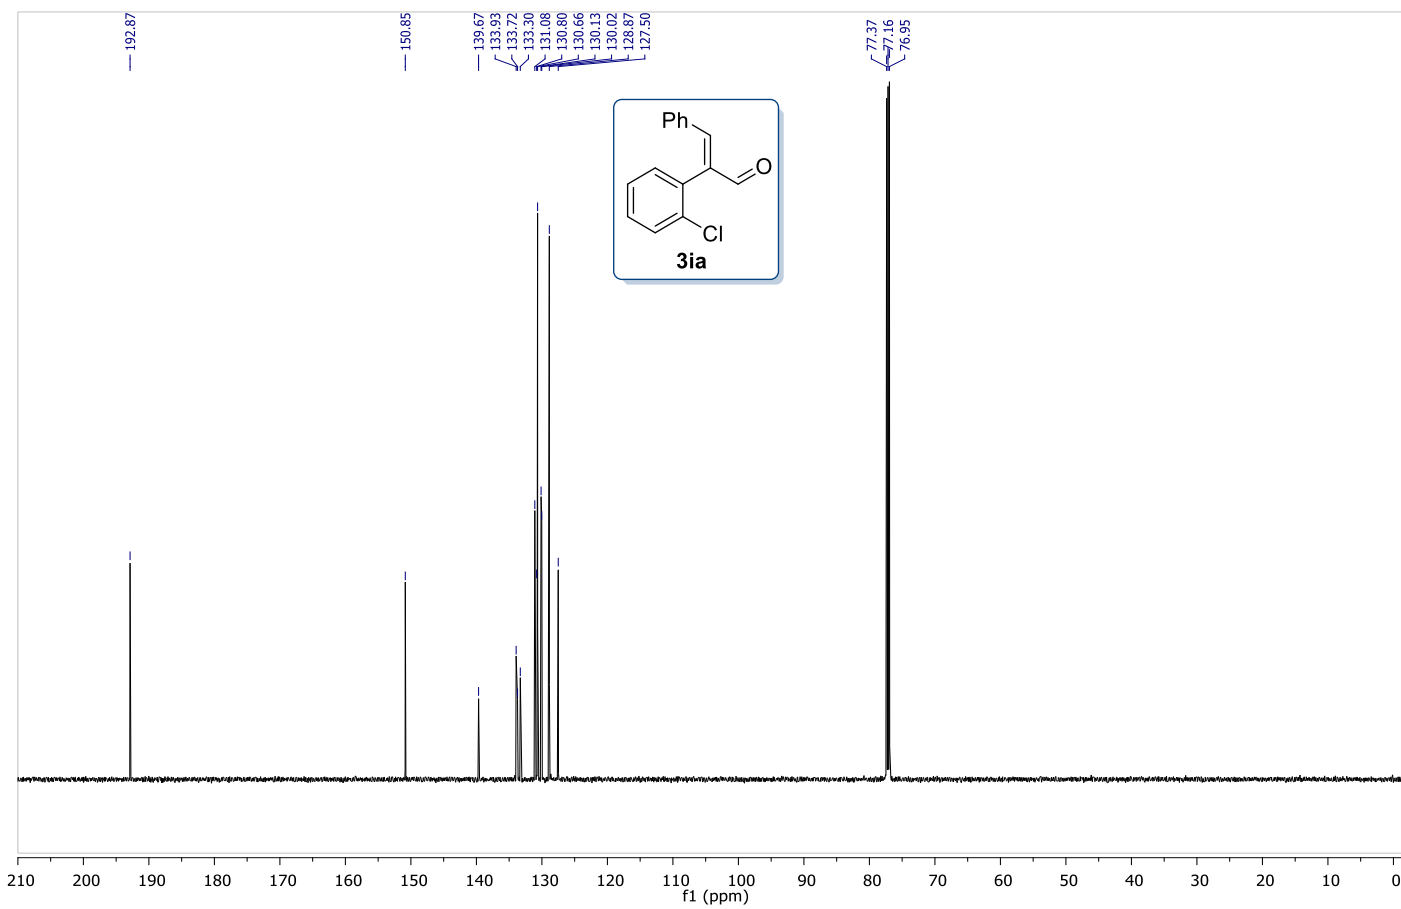

$^1\text{H}$  NMR (500 MHz,  $\text{CDCl}_3$ ) and  $^{13}\text{C}\{^1\text{H}\}$  NMR (126 MHz,  $\text{CDCl}_3$ ), **3ja**

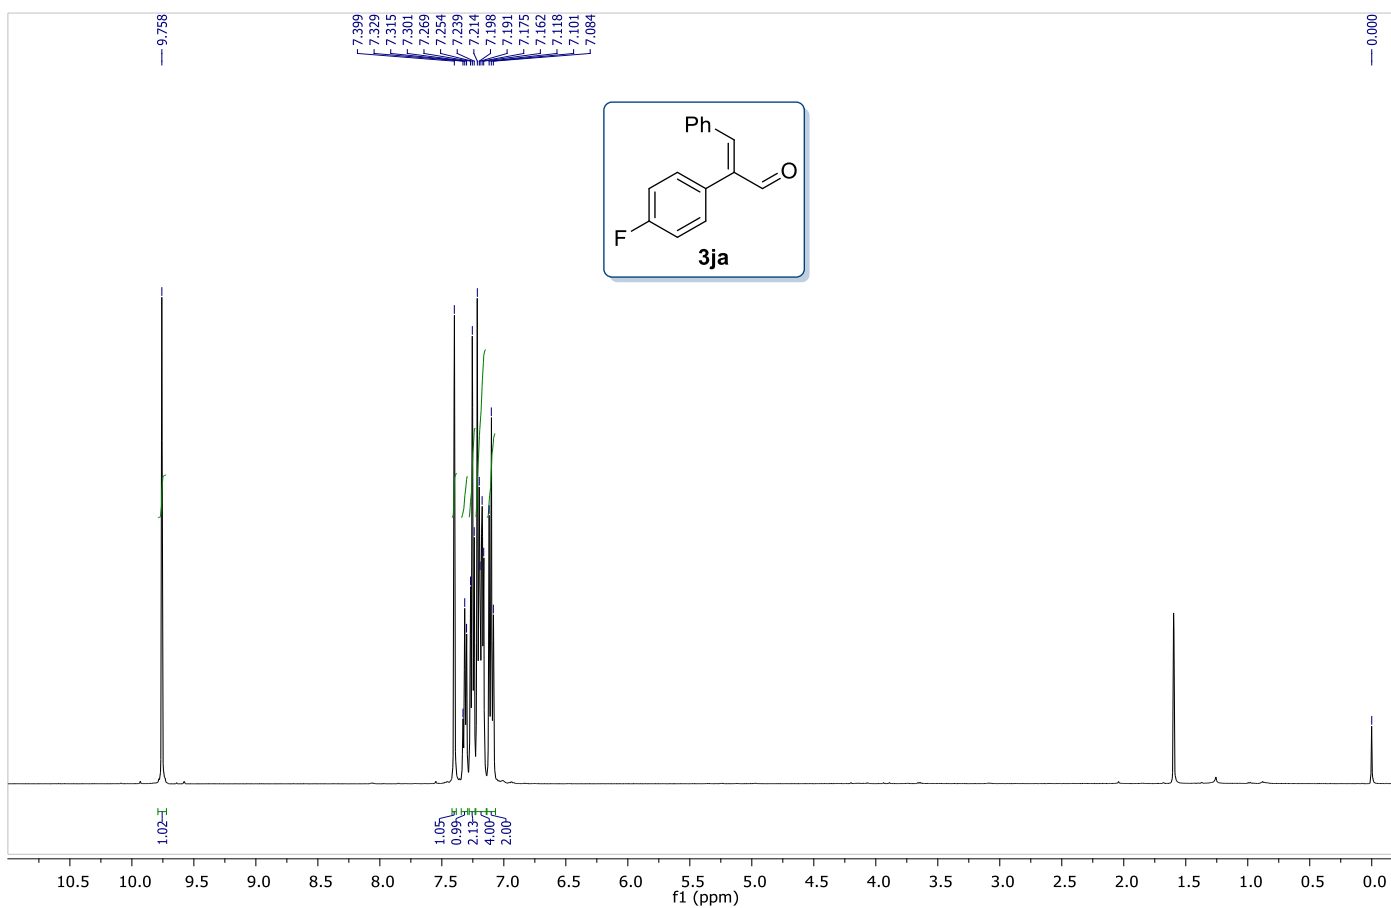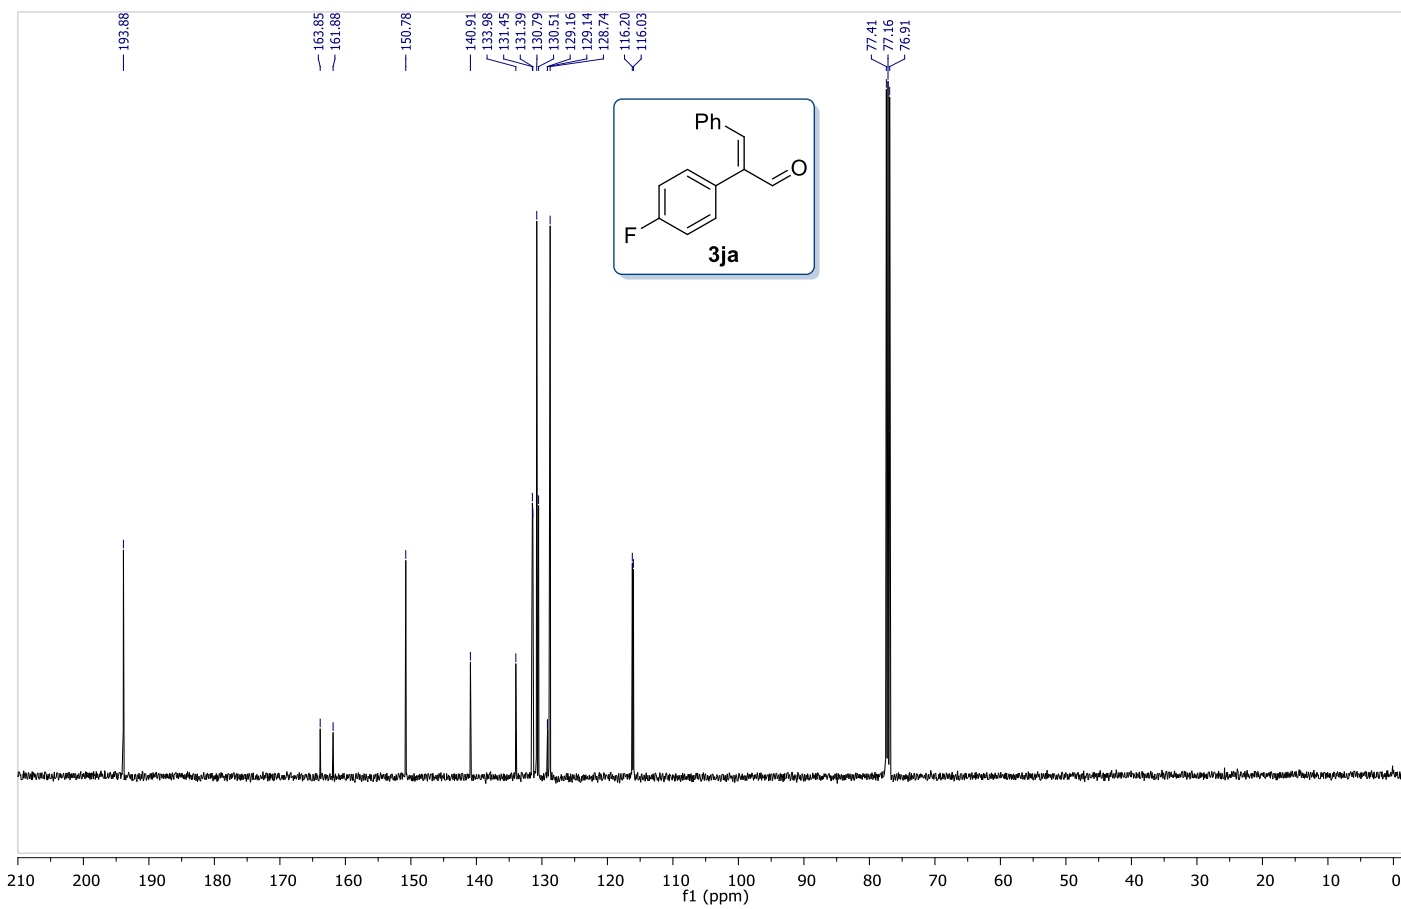

$^1\text{H}$  NMR (500 MHz,  $\text{CDCl}_3$ ) and  $^{13}\text{C}\{^1\text{H}\}$  NMR (126 MHz,  $\text{CDCl}_3$ ), **3ka**

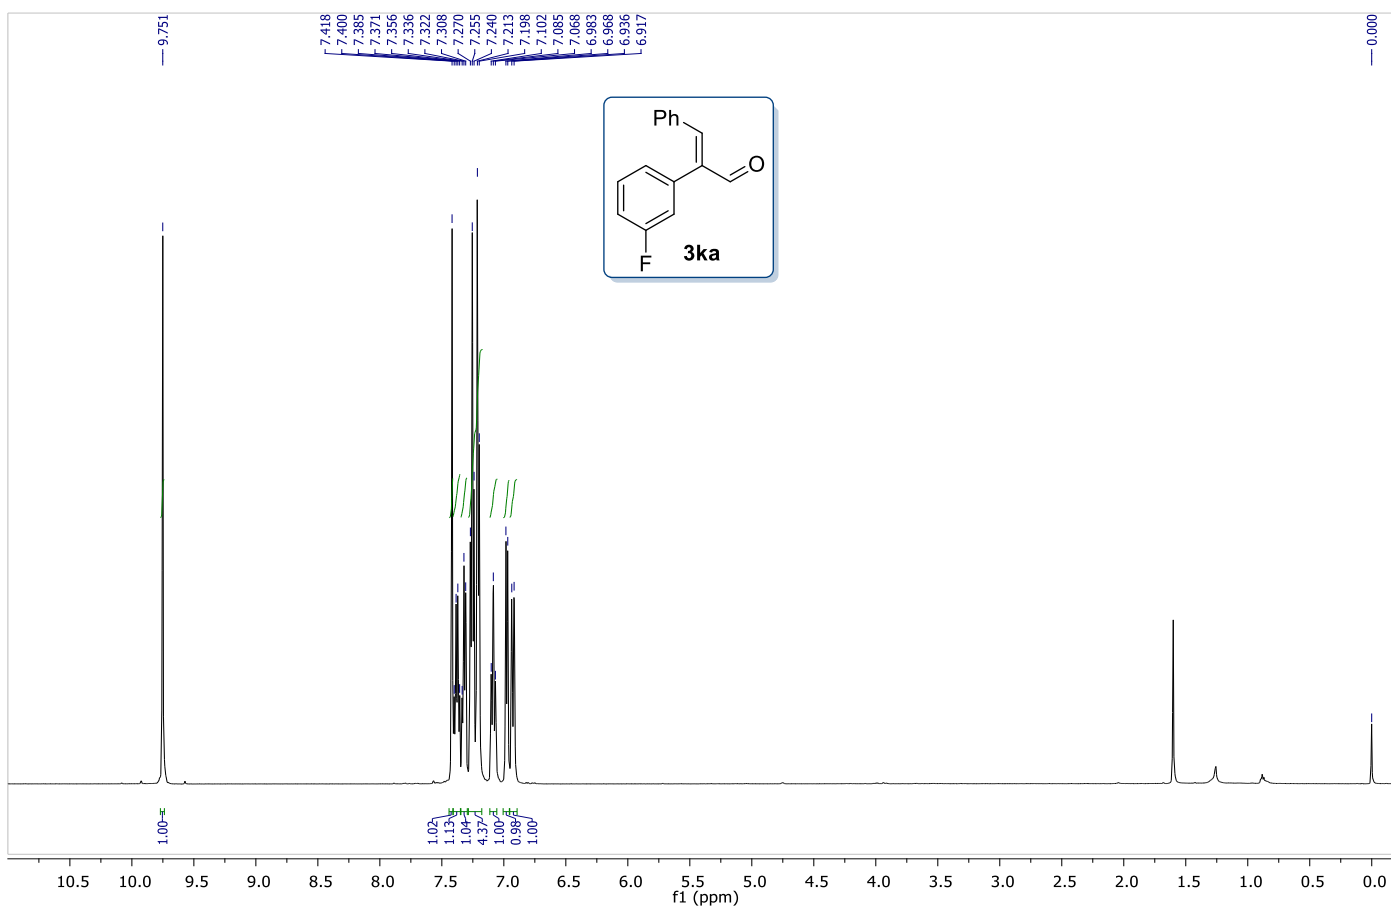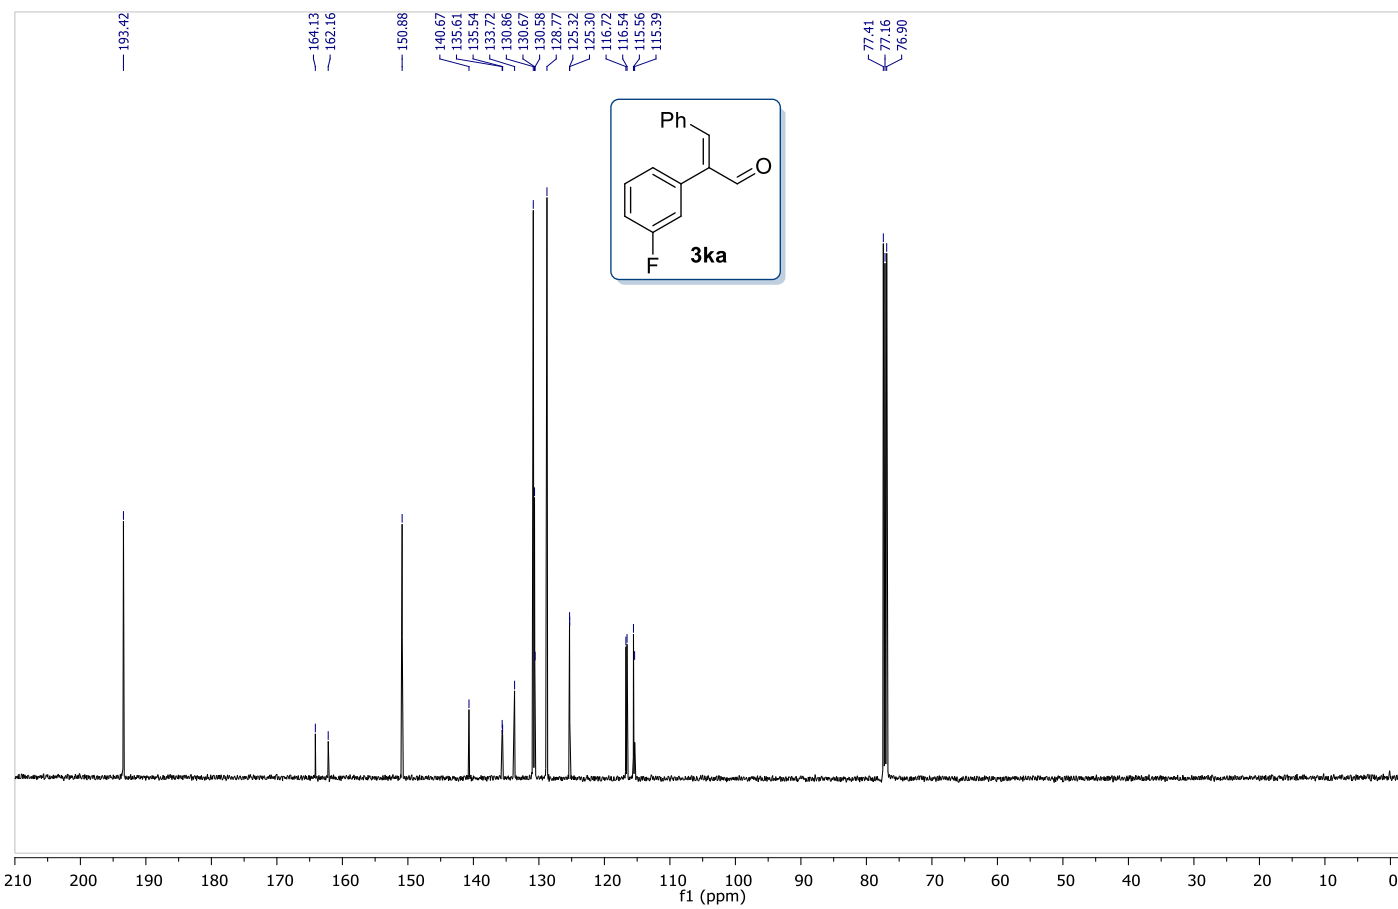

$^1\text{H}$  NMR (500 MHz,  $\text{CDCl}_3$ ) and  $^{13}\text{C}\{^1\text{H}\}$  NMR (126 MHz,  $\text{CDCl}_3$ ), **3la**

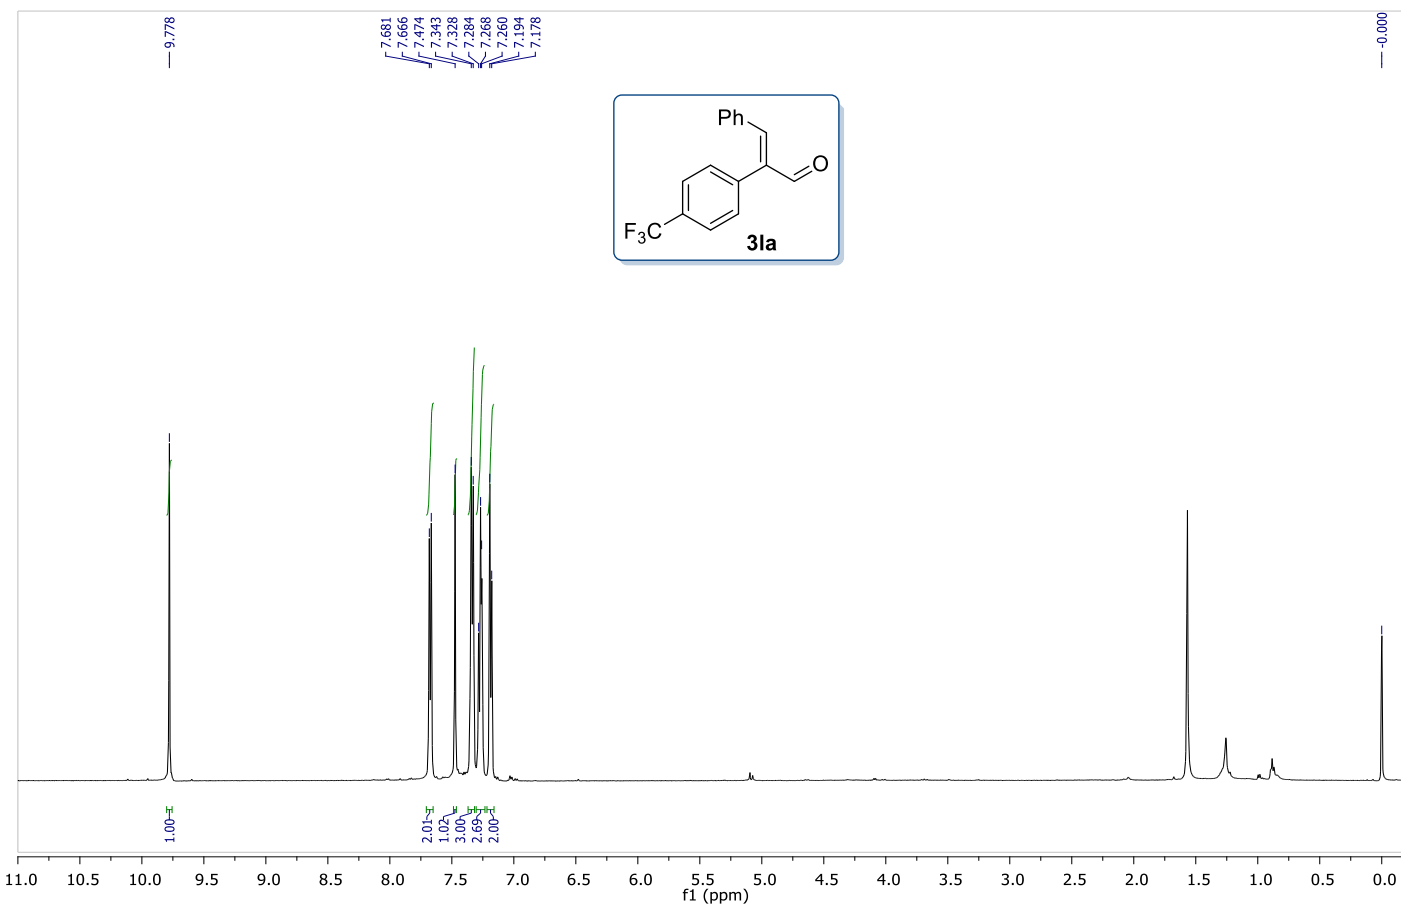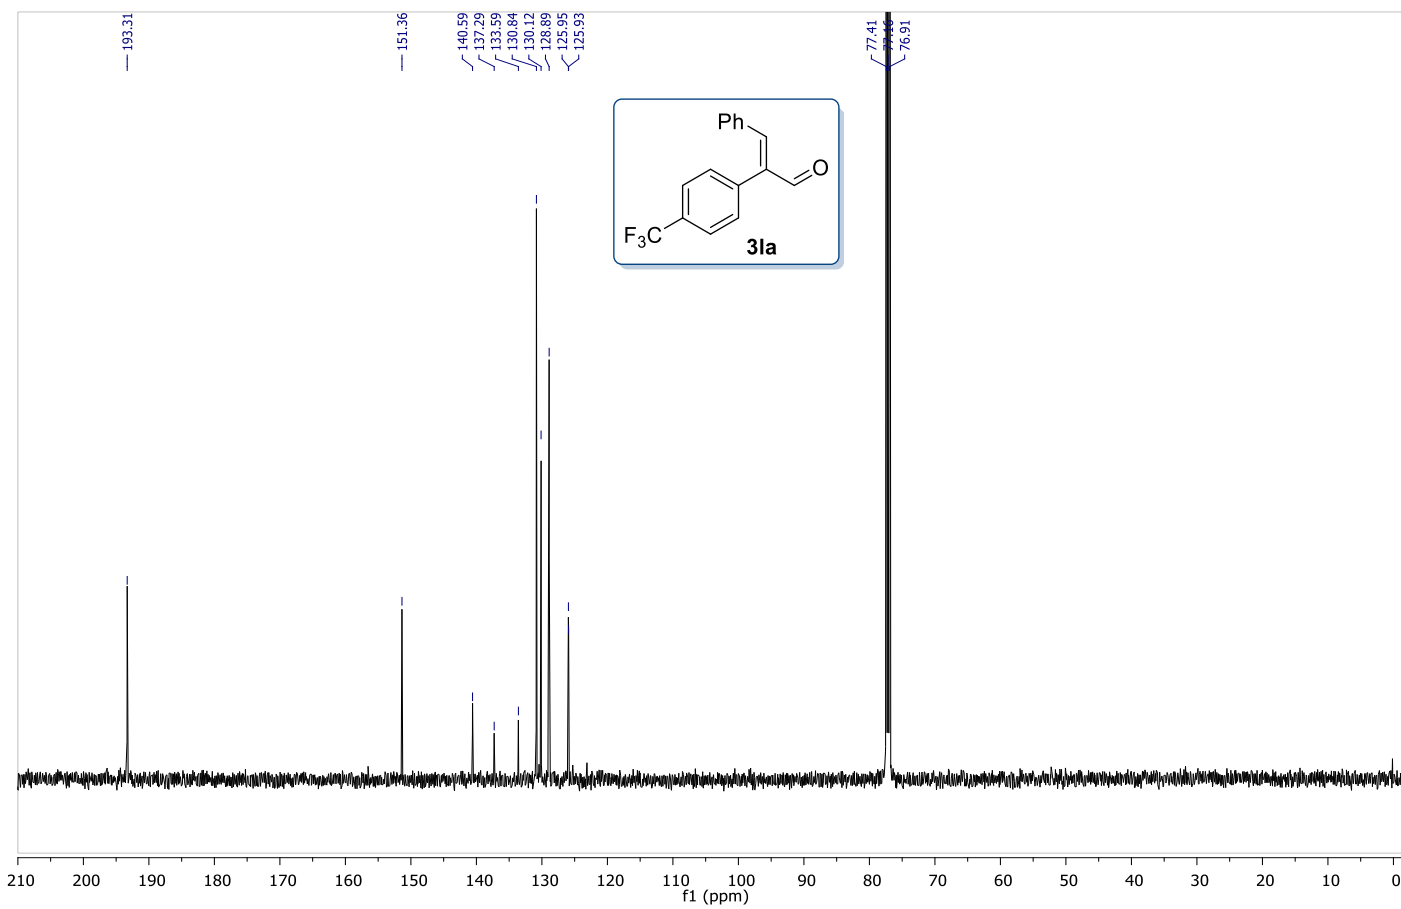

$^1\text{H}$  NMR (600 MHz,  $\text{CDCl}_3$ ) and  $^{13}\text{C}\{^1\text{H}\}$  NMR (151 MHz,  $\text{CDCl}_3$ ), **3ma**

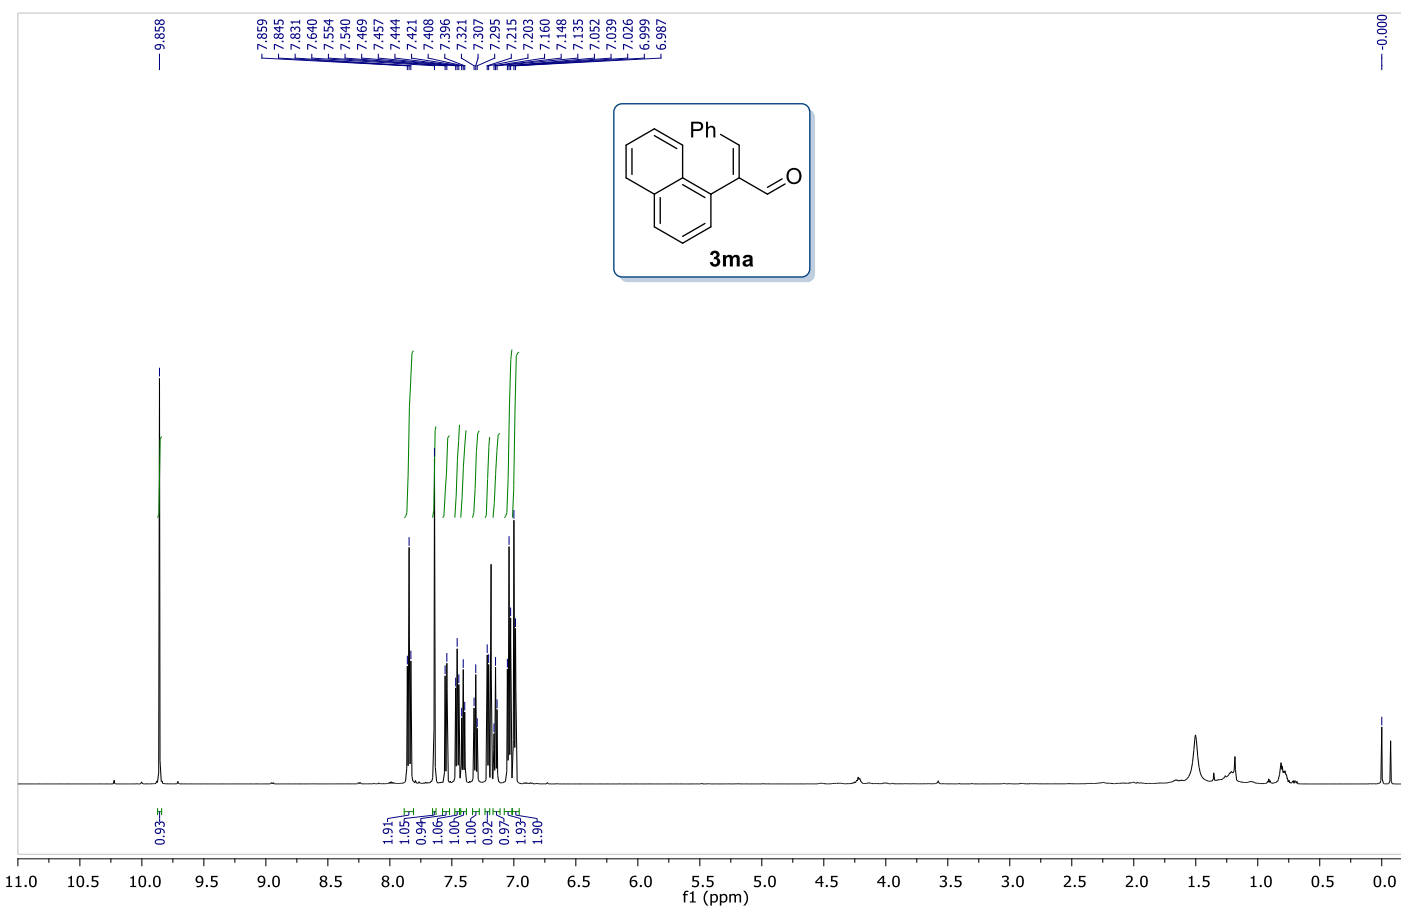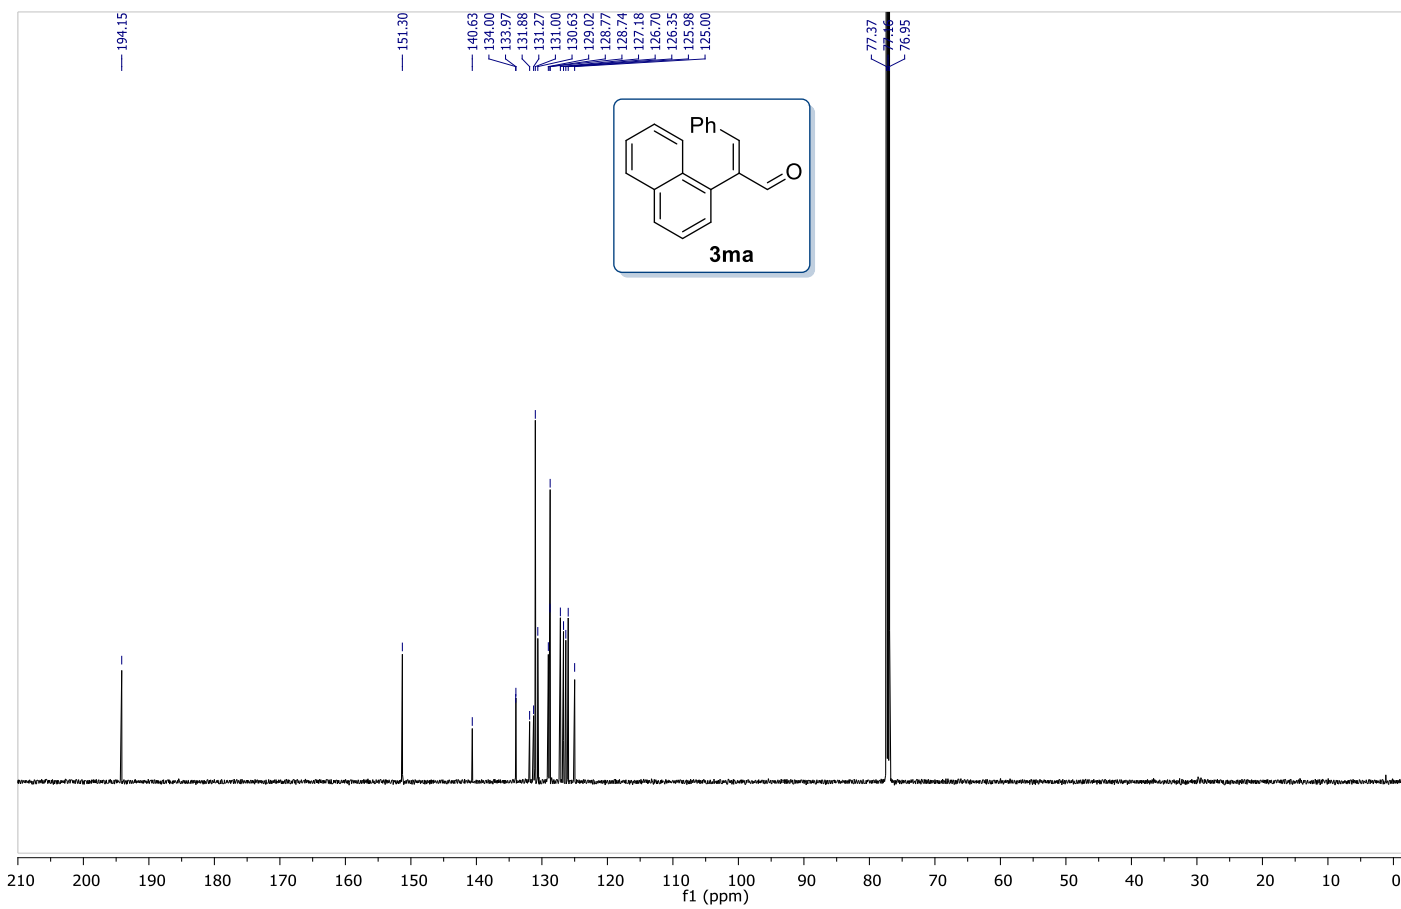

$^1\text{H}$  NMR (500 MHz,  $\text{CDCl}_3$ ) and  $^{13}\text{C}\{^1\text{H}\}$  NMR (1151 MHz,  $\text{CDCl}_3$ ), **3cm**

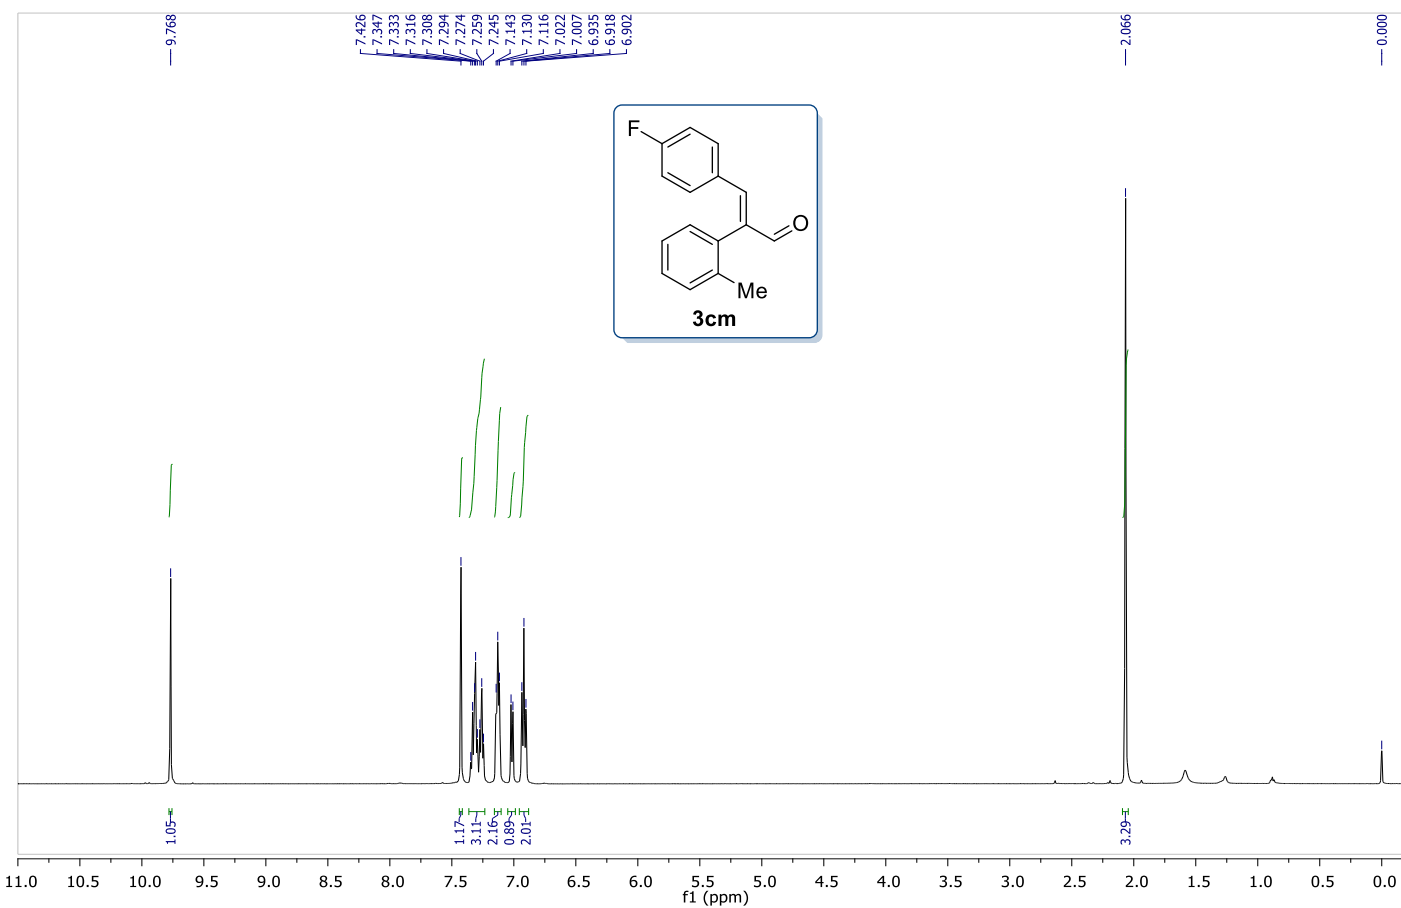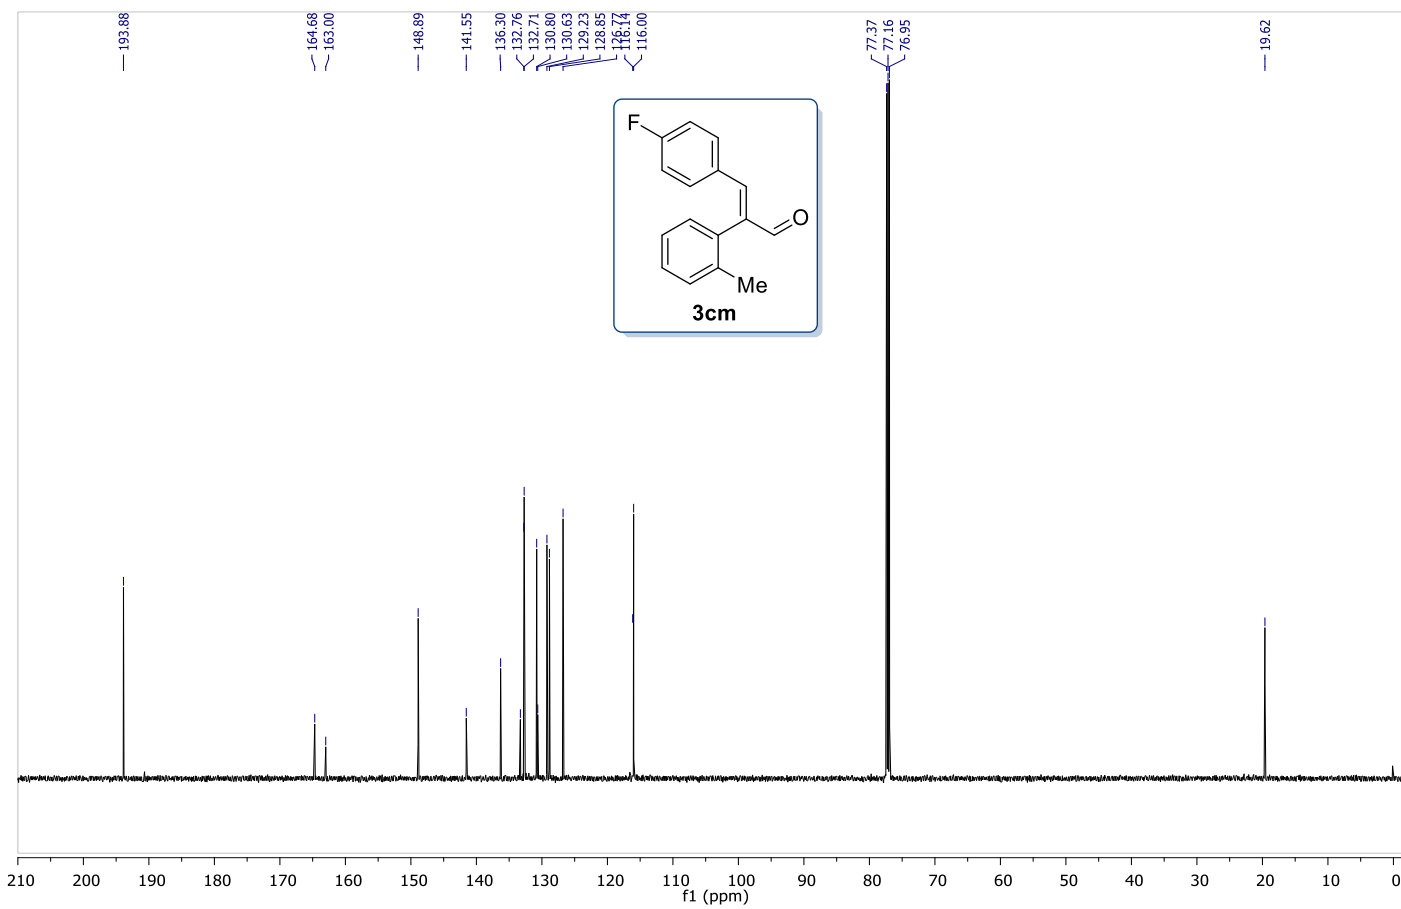

$^1\text{H}$  NMR (600 MHz,  $\text{CDCl}_3$ ) and  $^{13}\text{C}\{^1\text{H}\}$  NMR (151 MHz,  $\text{CDCl}_3$ ), **3gi**

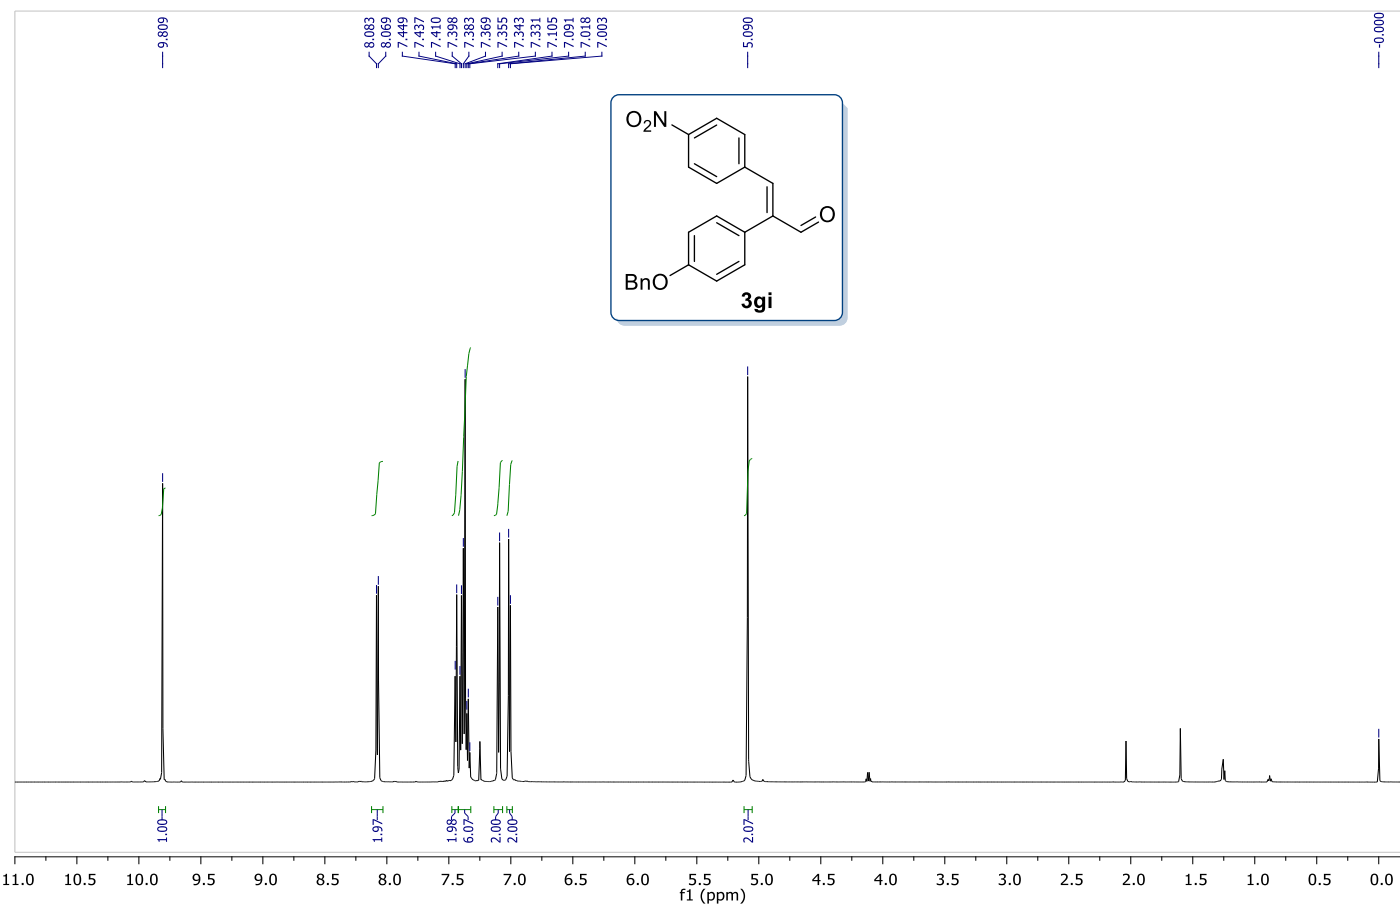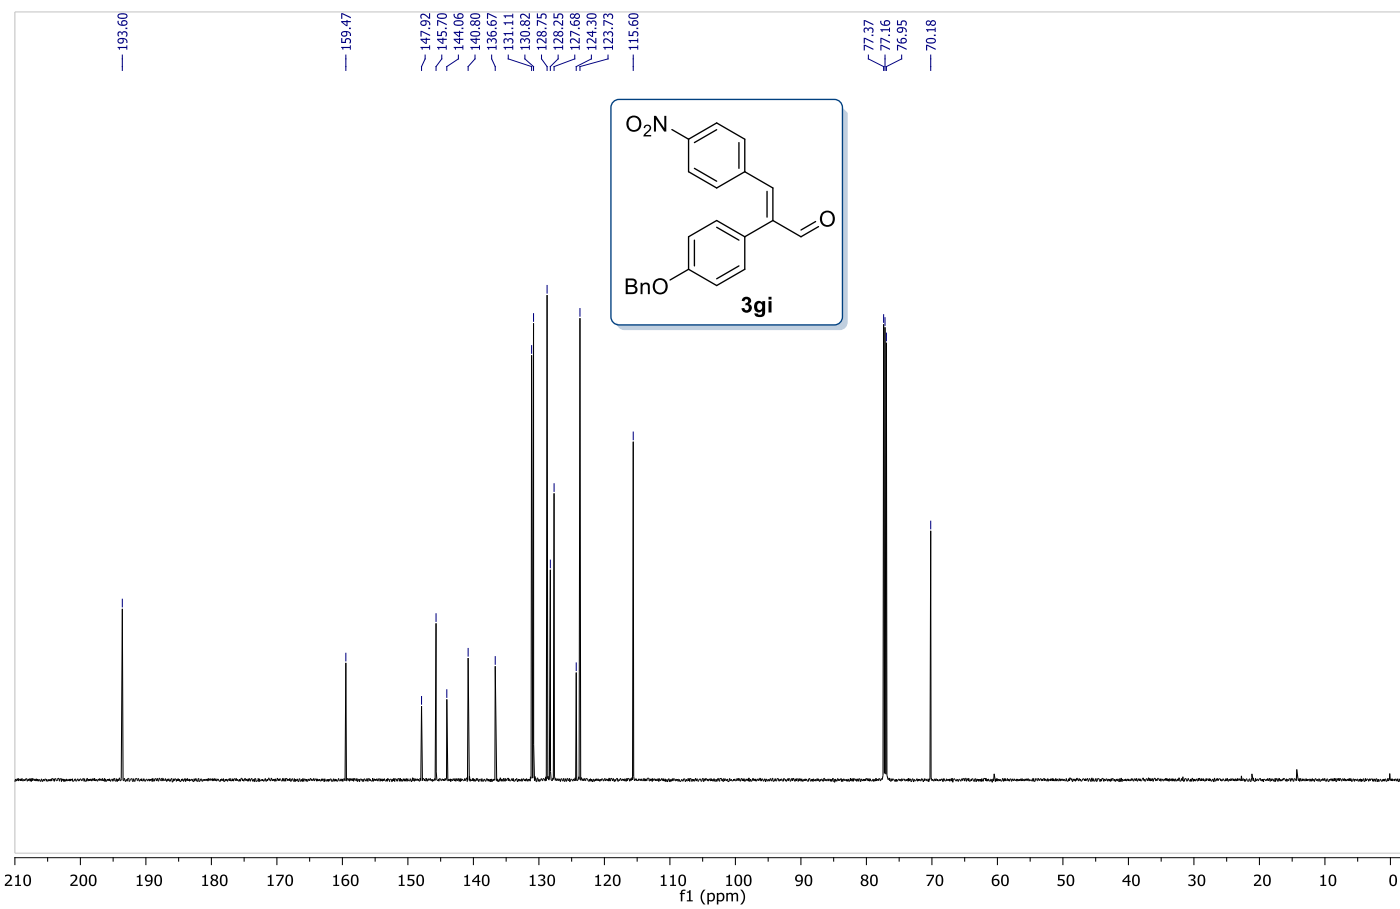

$^1\text{H}$  NMR (600 MHz,  $\text{CDCl}_3$ ) and  $^{13}\text{C}\{^1\text{H}\}$  NMR (151 MHz,  $\text{CDCl}_3$ ), **3ei**

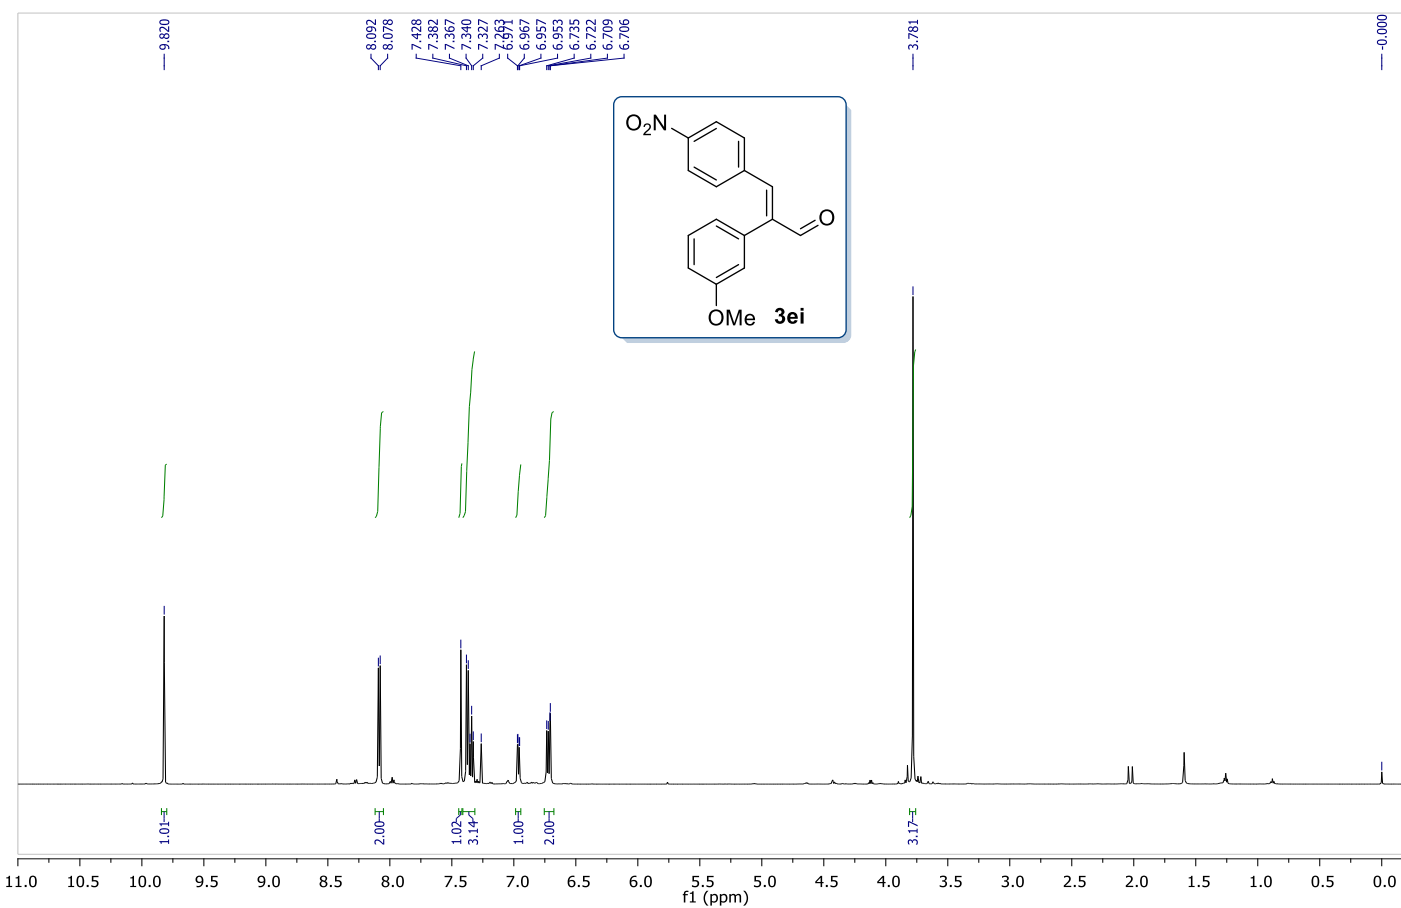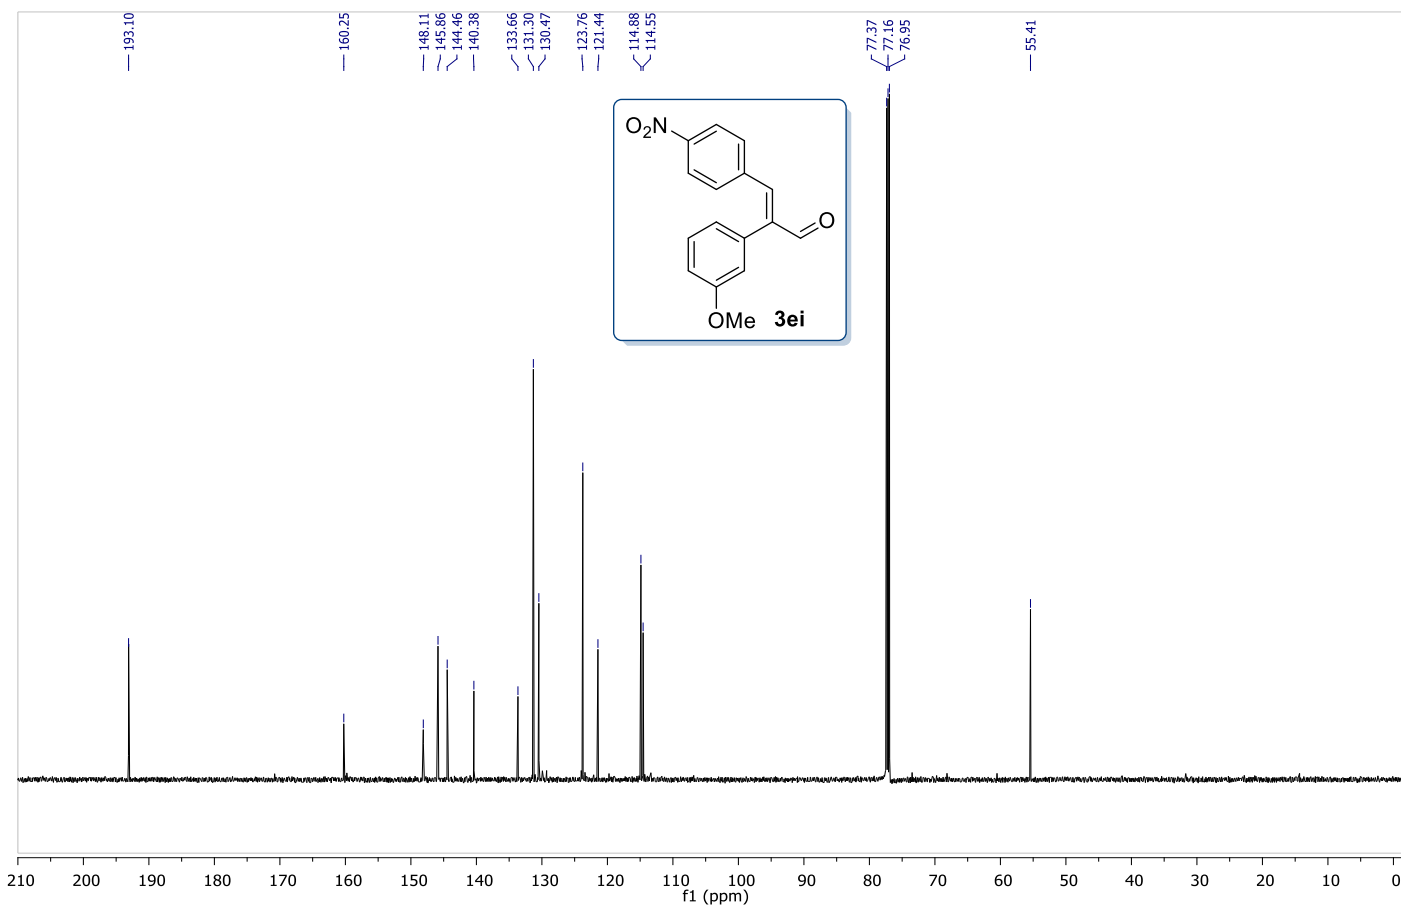

$^1\text{H}$  NMR (500 MHz,  $\text{CDCl}_3$ ) and  $^{13}\text{C}\{^1\text{H}\}$  NMR (126 MHz,  $\text{CDCl}_3$ ), **3ji**

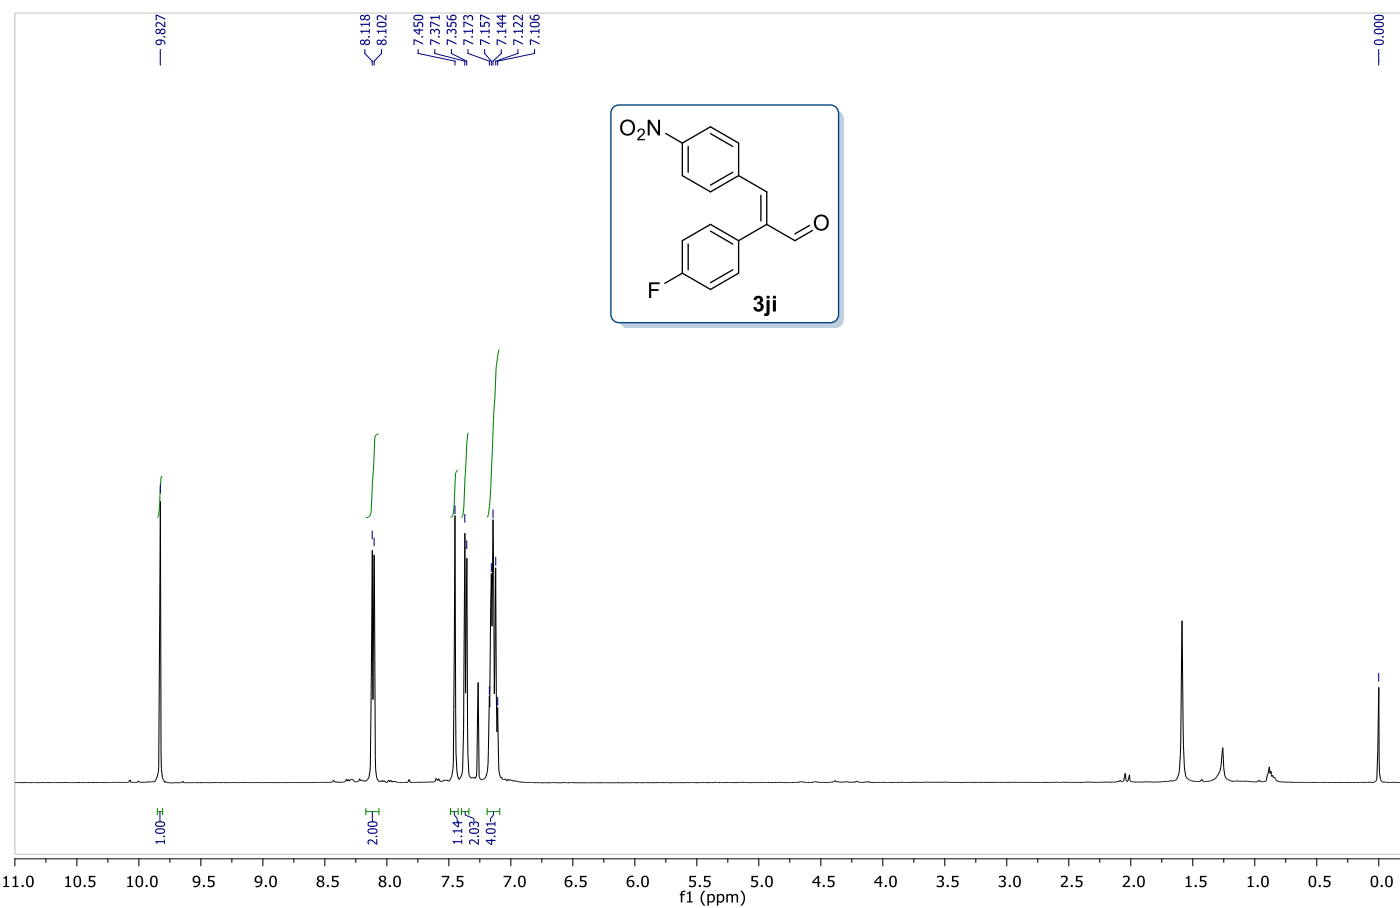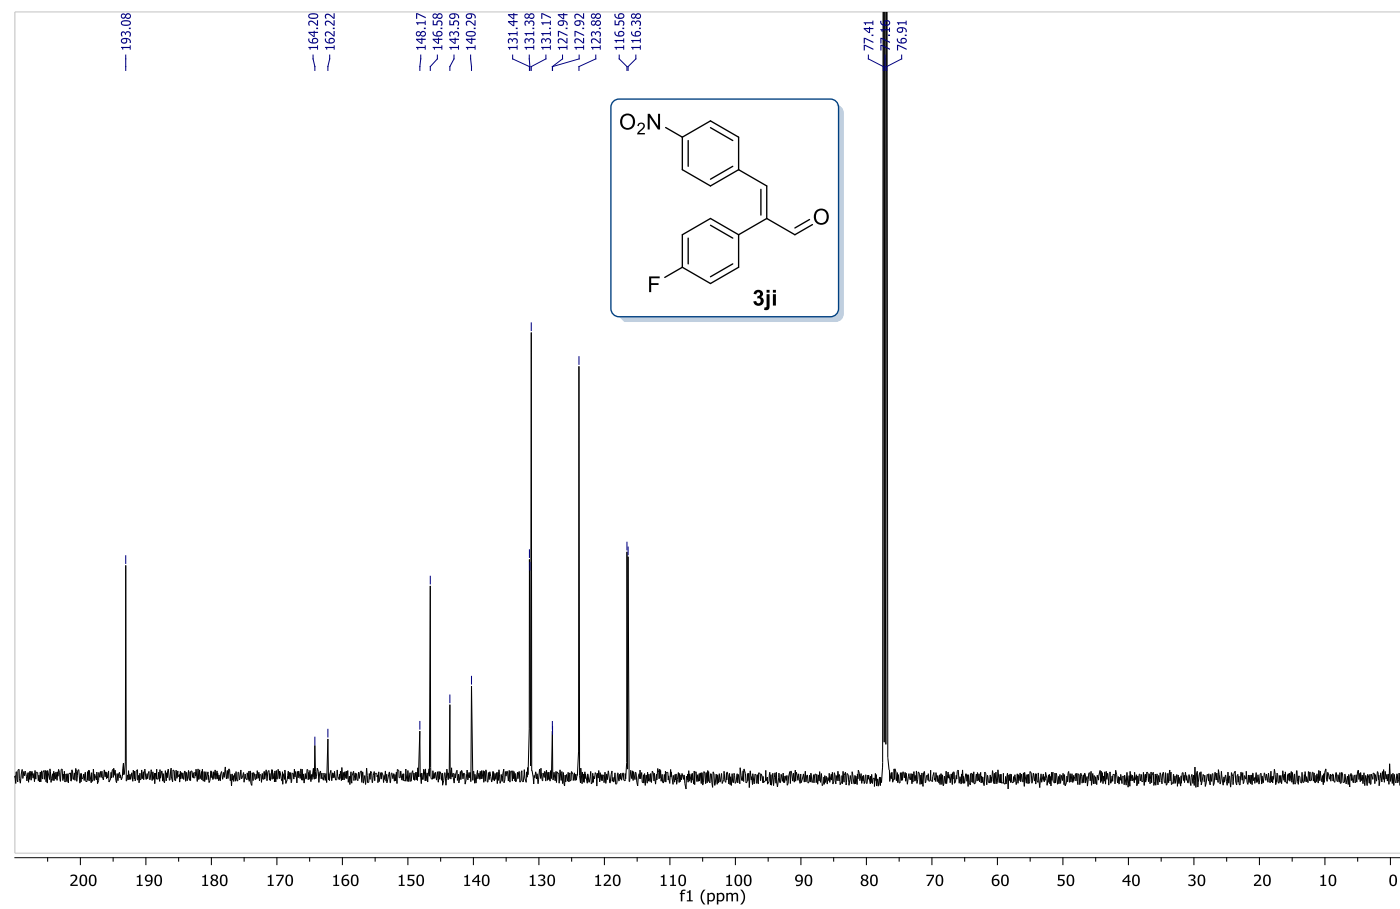

$^1\text{H}$  NMR (500 MHz,  $\text{CDCl}_3$ ) and  $^{13}\text{C}\{^1\text{H}\}$  NMR (151 MHz,  $\text{CDCl}_3$ ), **3Im**

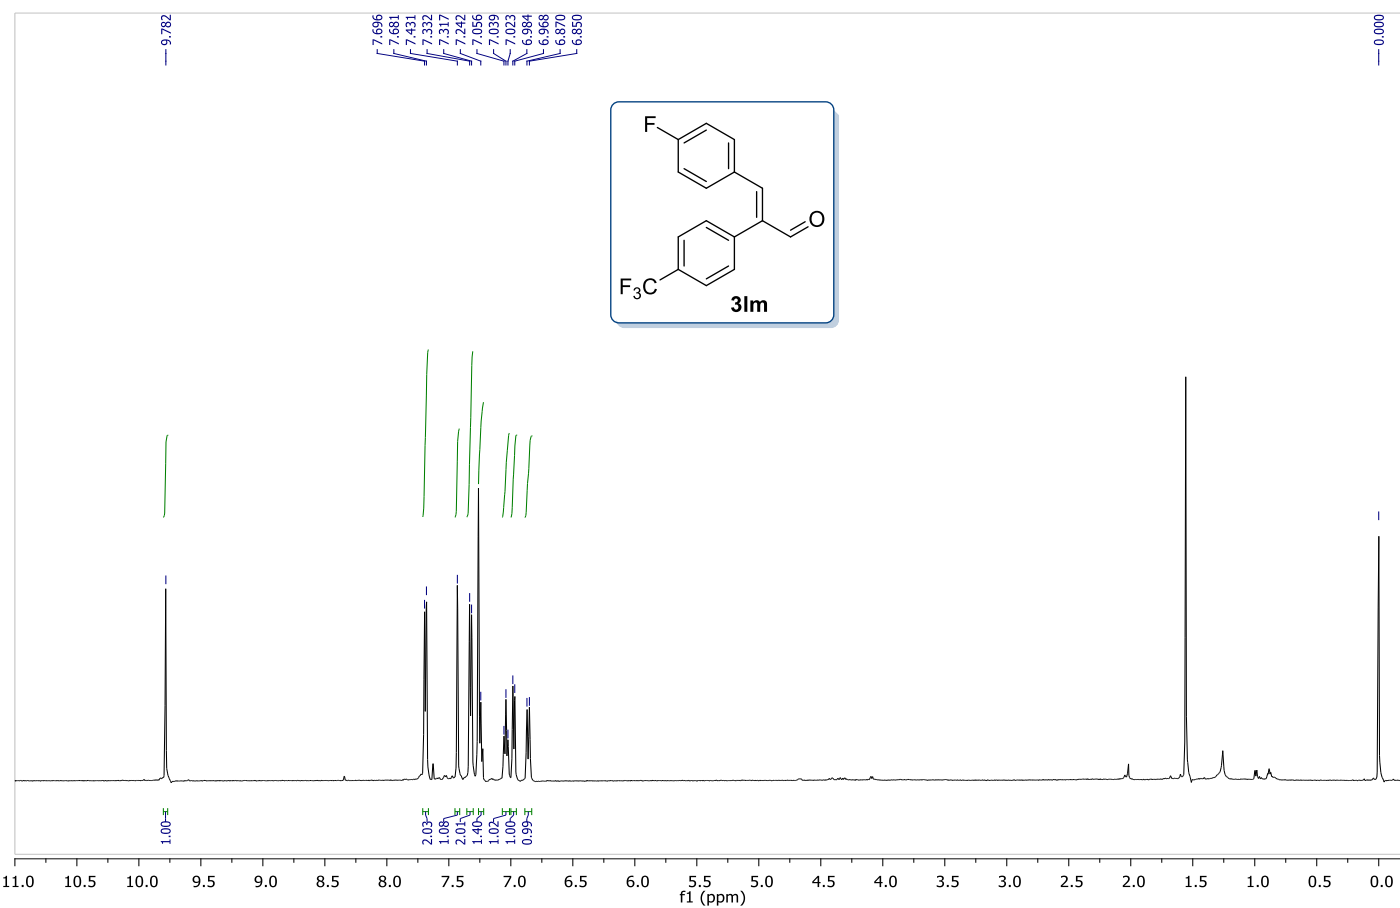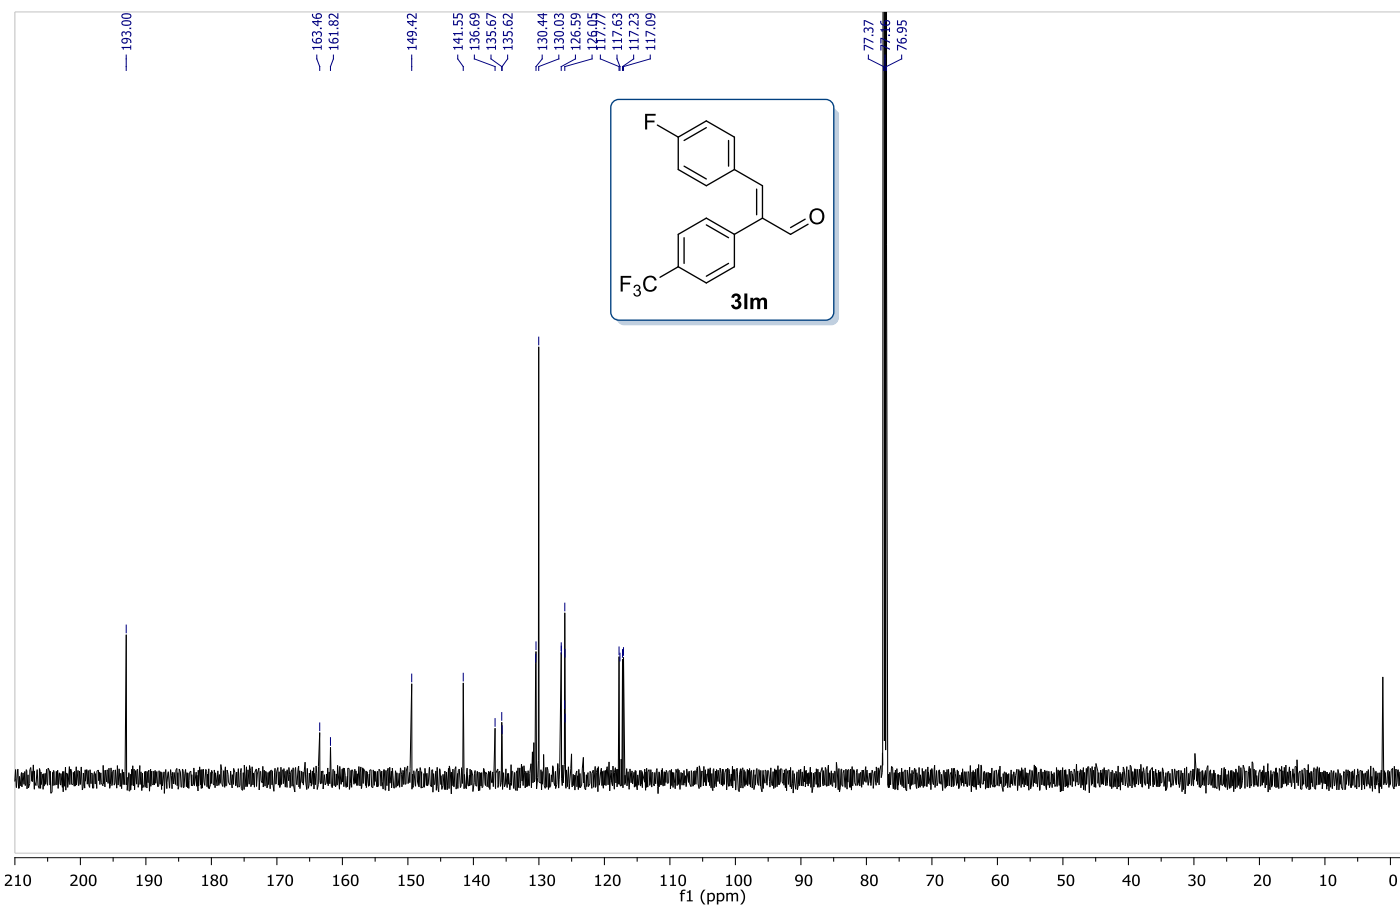

$^1\text{H}$  NMR (600 MHz,  $\text{CDCl}_3$ ) and  $^{13}\text{C}\{^1\text{H}\}$  NMR (151 MHz,  $\text{CDCl}_3$ ), **3dk**

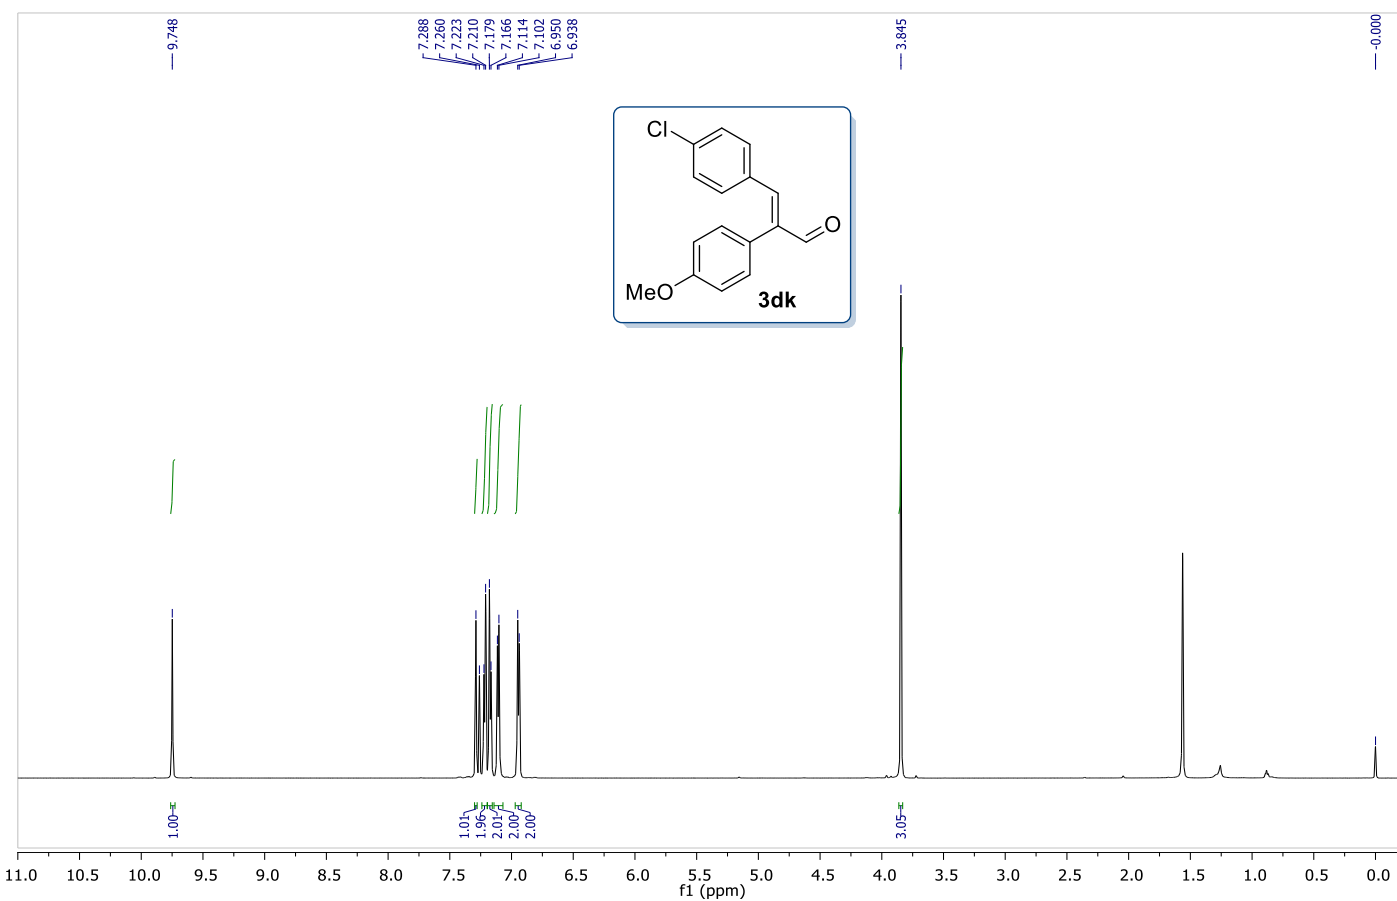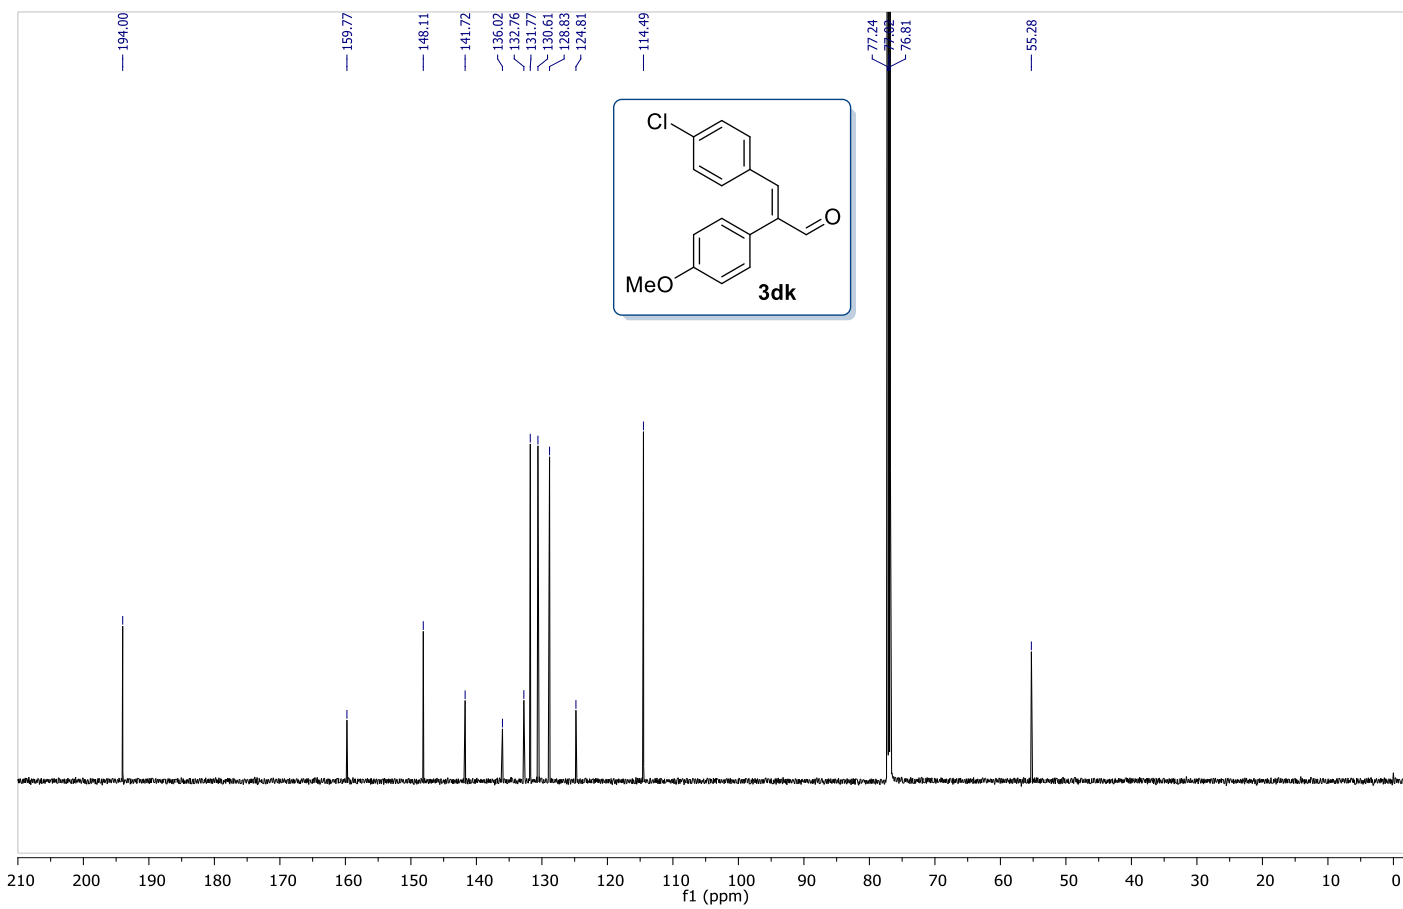

$^1\text{H}$  NMR (600 MHz,  $\text{CDCl}_3$ ) and  $^{13}\text{C}\{^1\text{H}\}$  NMR (151 MHz,  $\text{CDCl}_3$ ), **3fk**

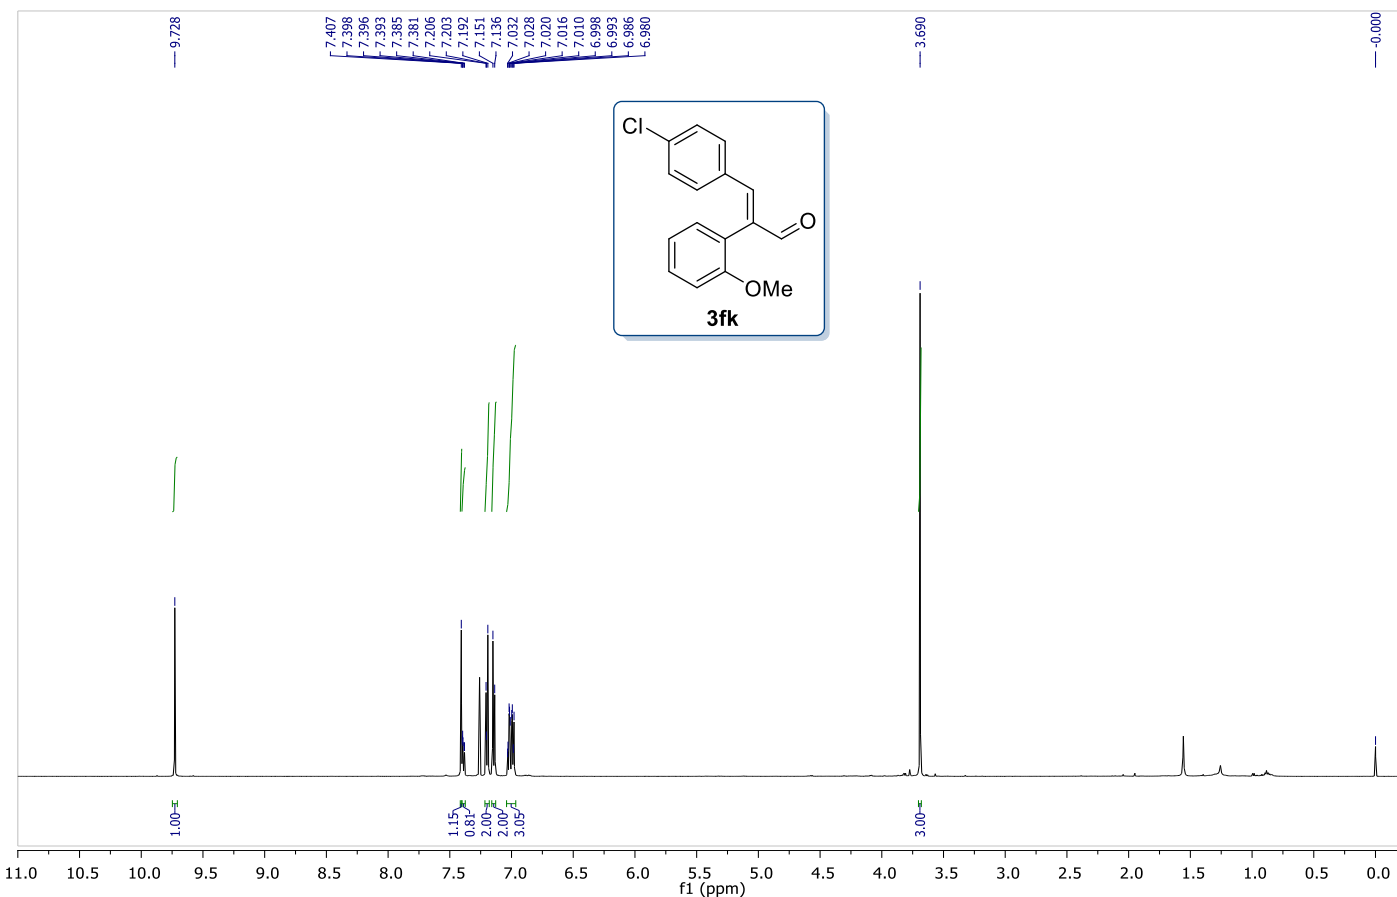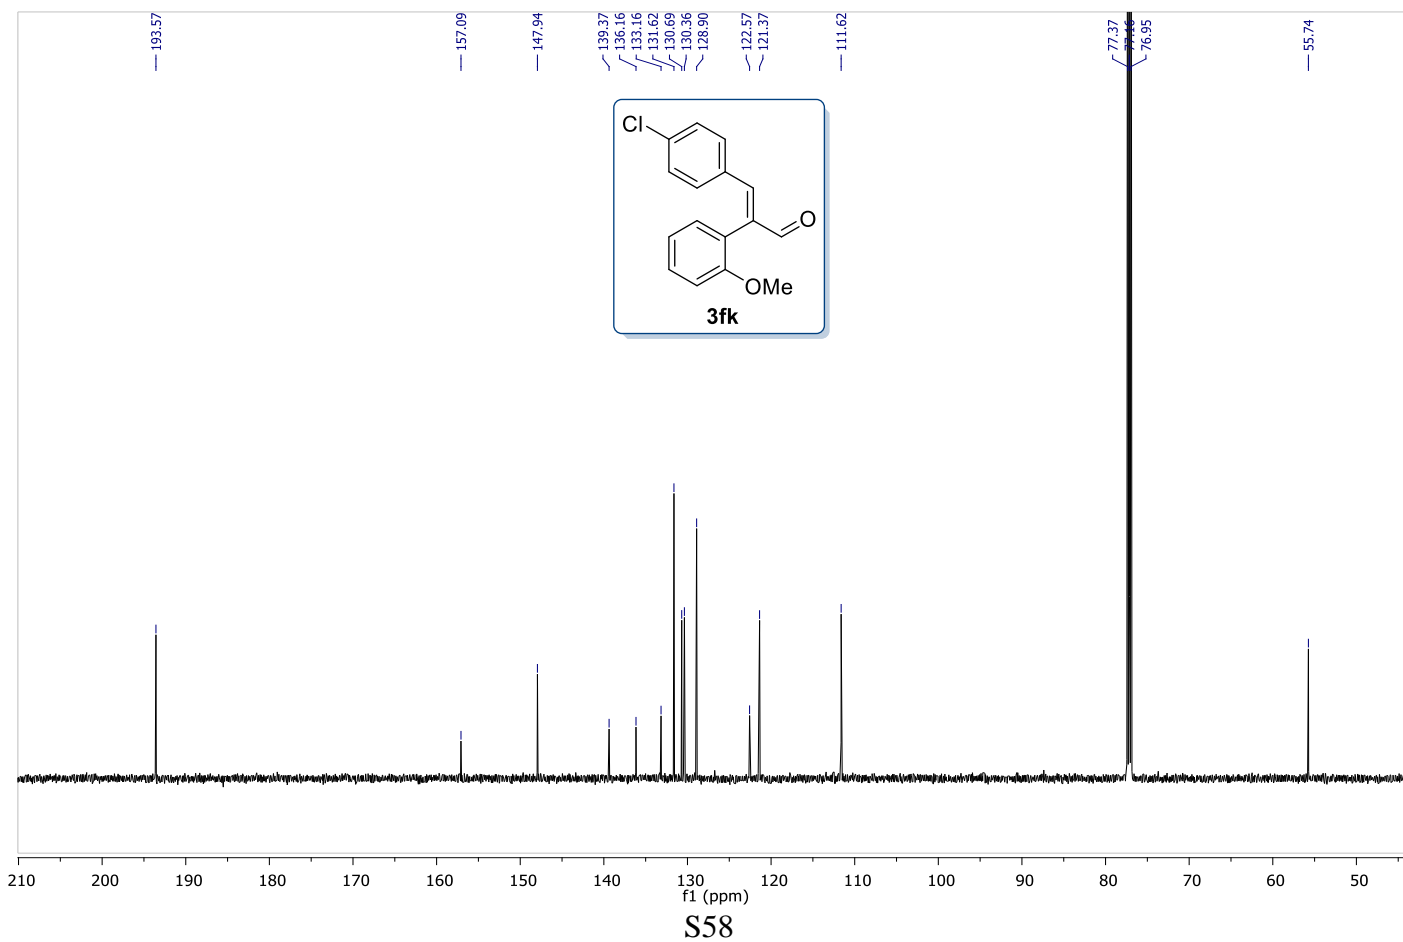

$^1\text{H}$  NMR (500 MHz,  $\text{CDCl}_3$ ) and  $^{13}\text{C}\{^1\text{H}\}$  NMR (126 MHz,  $\text{CDCl}_3$ ), **5**

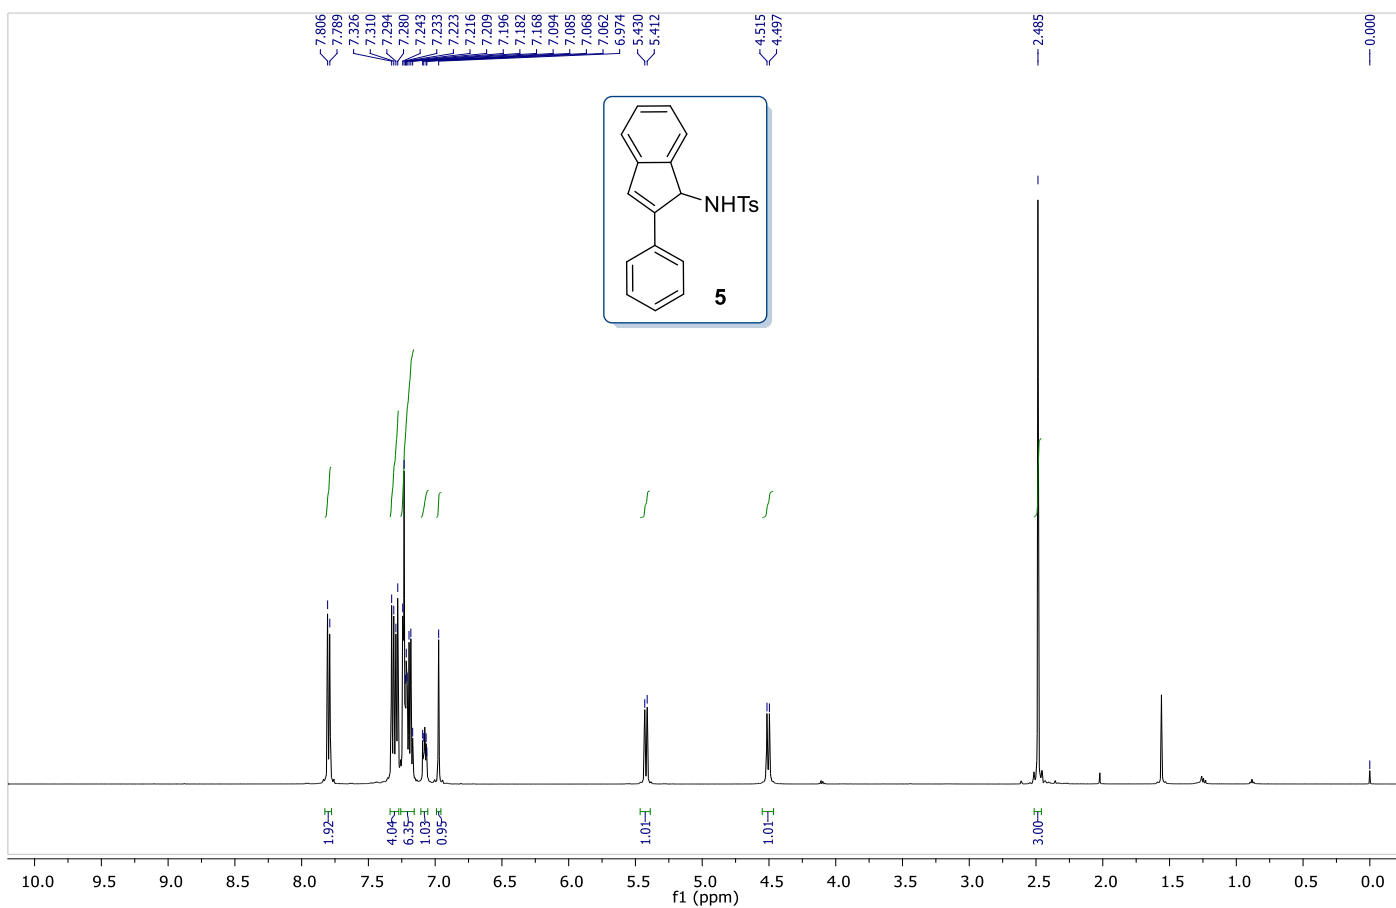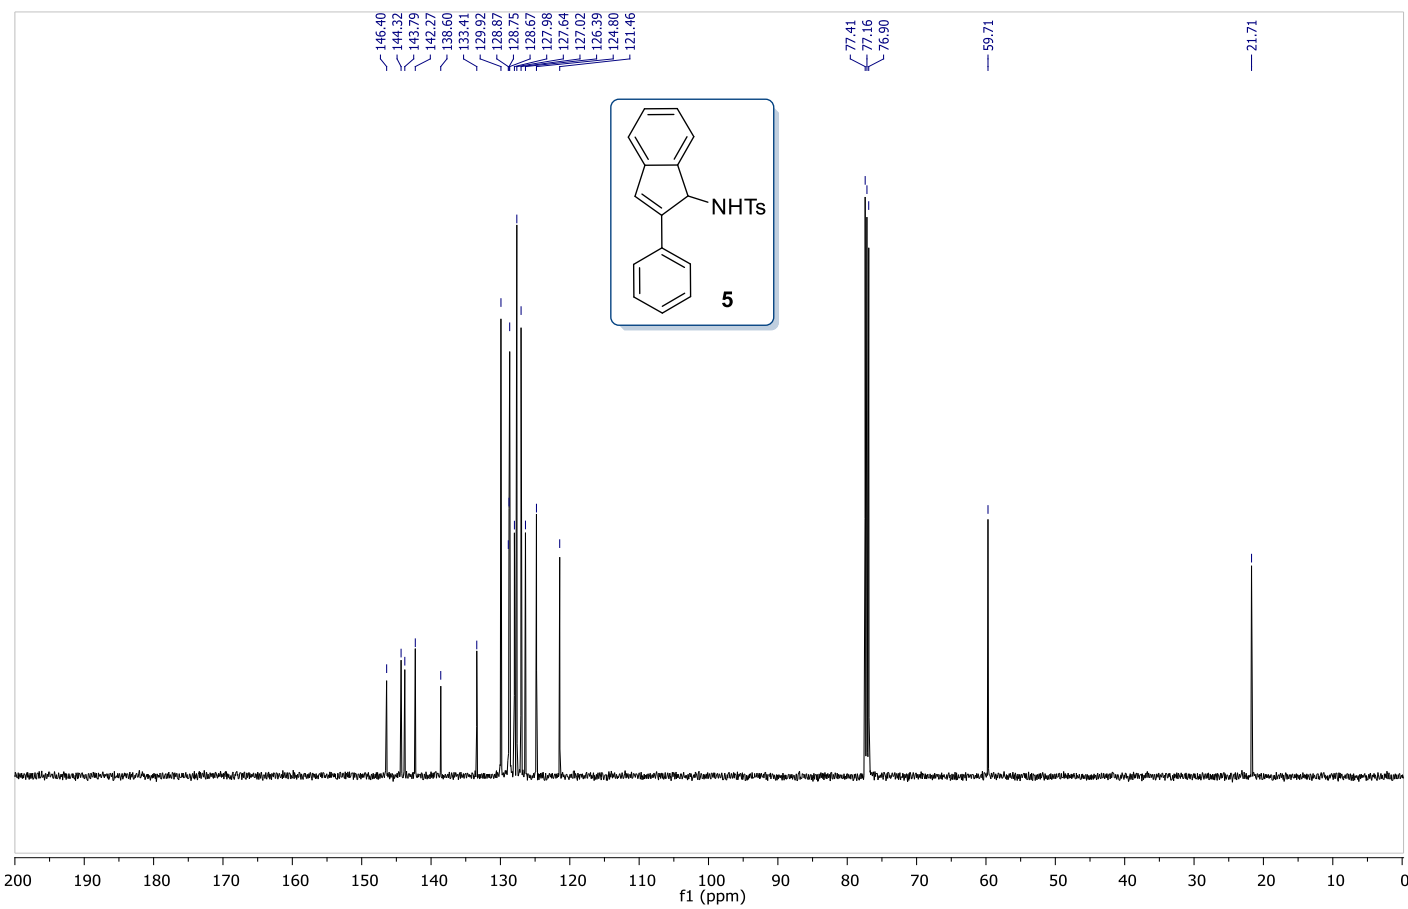

$^1\text{H}$  NMR (500 MHz,  $\text{CDCl}_3$ ) and  $^{13}\text{C}\{^1\text{H}\}$  NMR (126 MHz,  $\text{CDCl}_3$ ), **6**

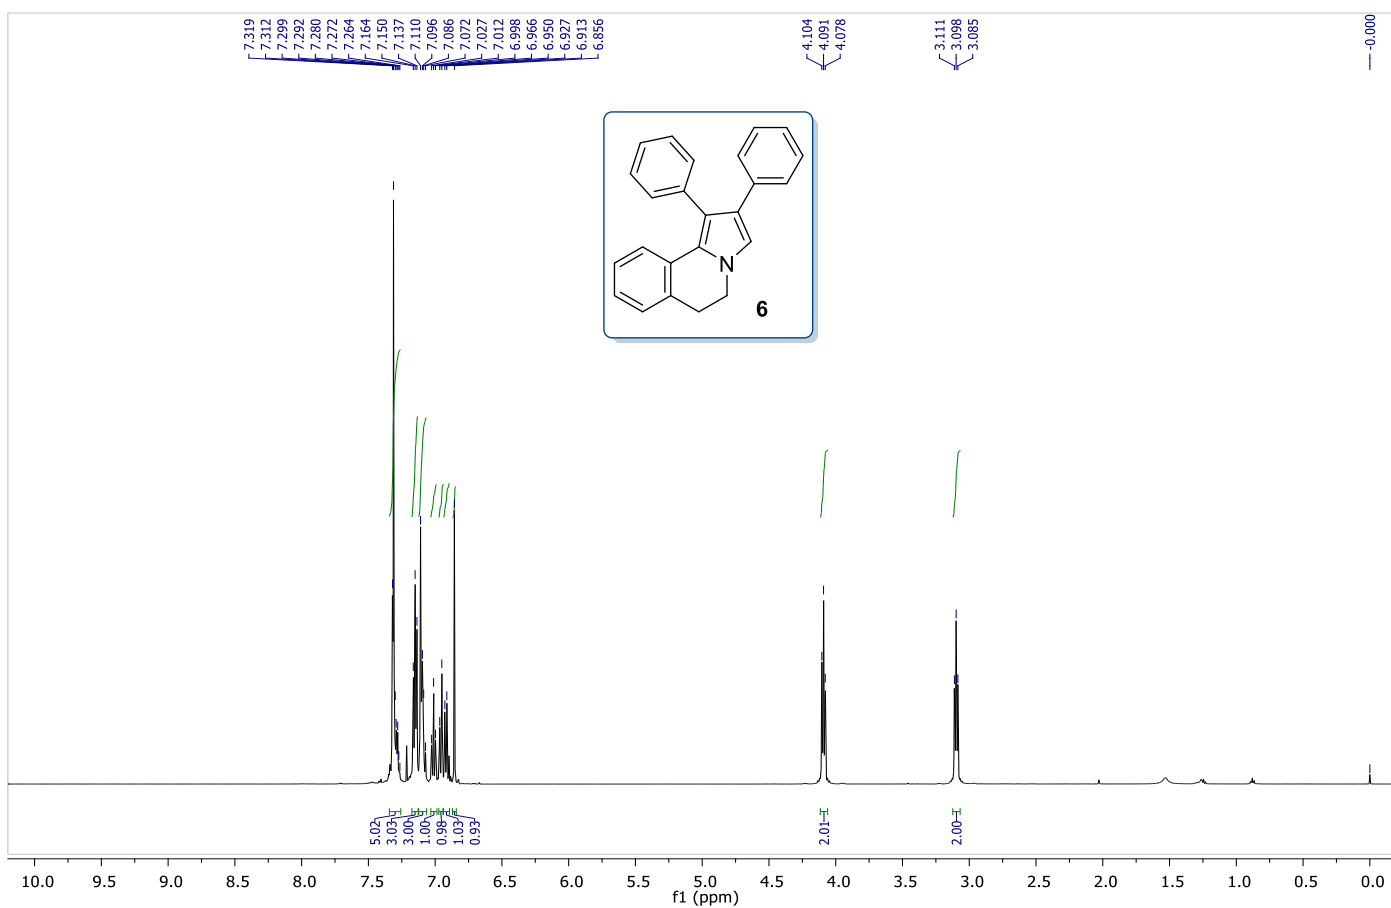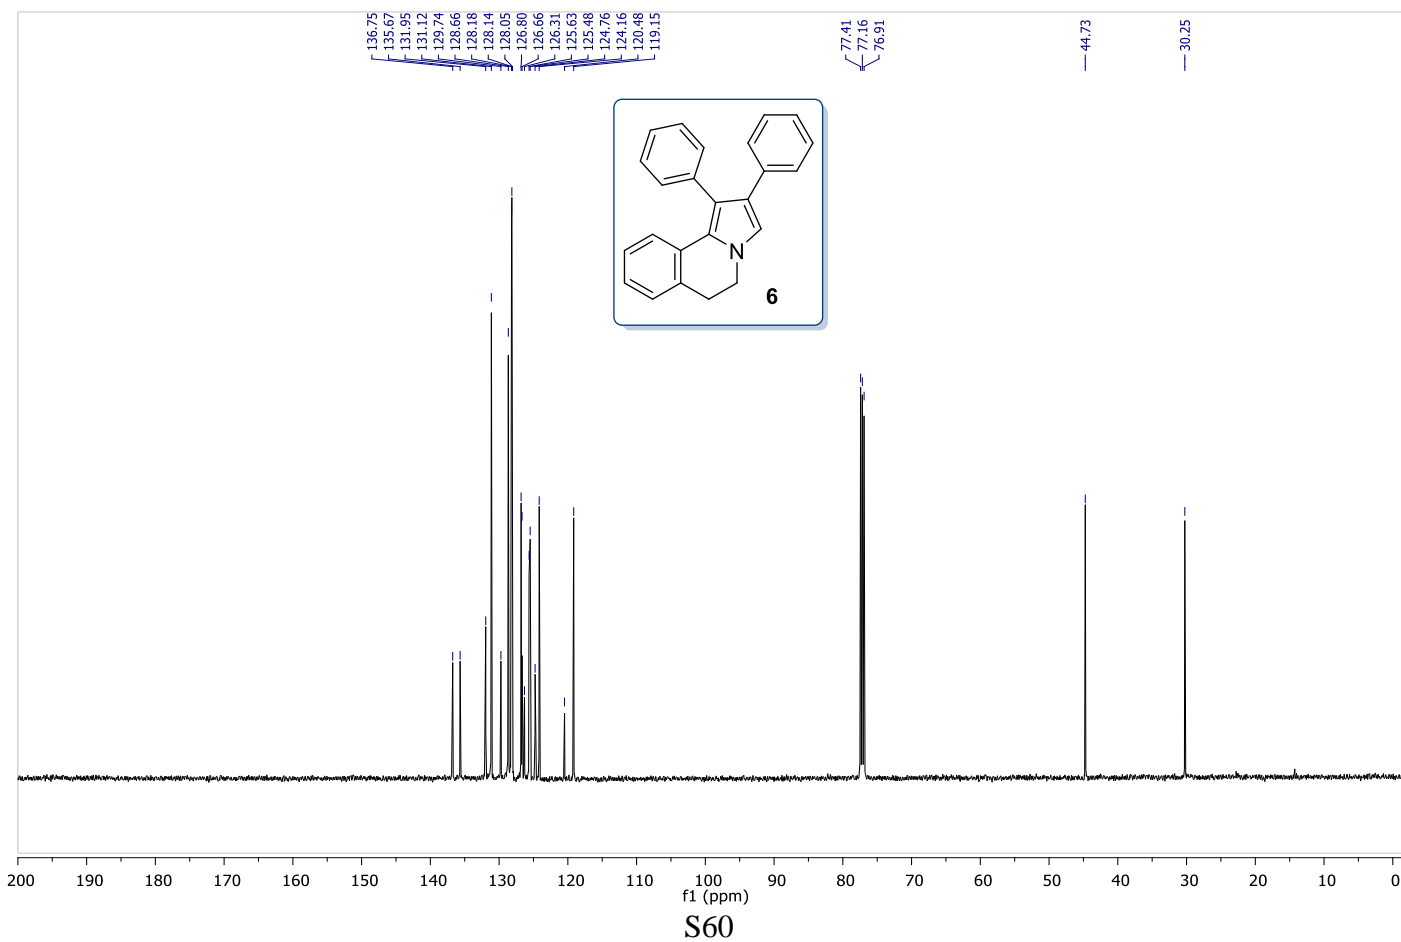

$^1\text{H}$  NMR (500 MHz,  $\text{CDCl}_3$ ) and  $^{13}\text{C}\{^1\text{H}\}$  NMR (126 MHz,  $\text{CDCl}_3$ ), **7**

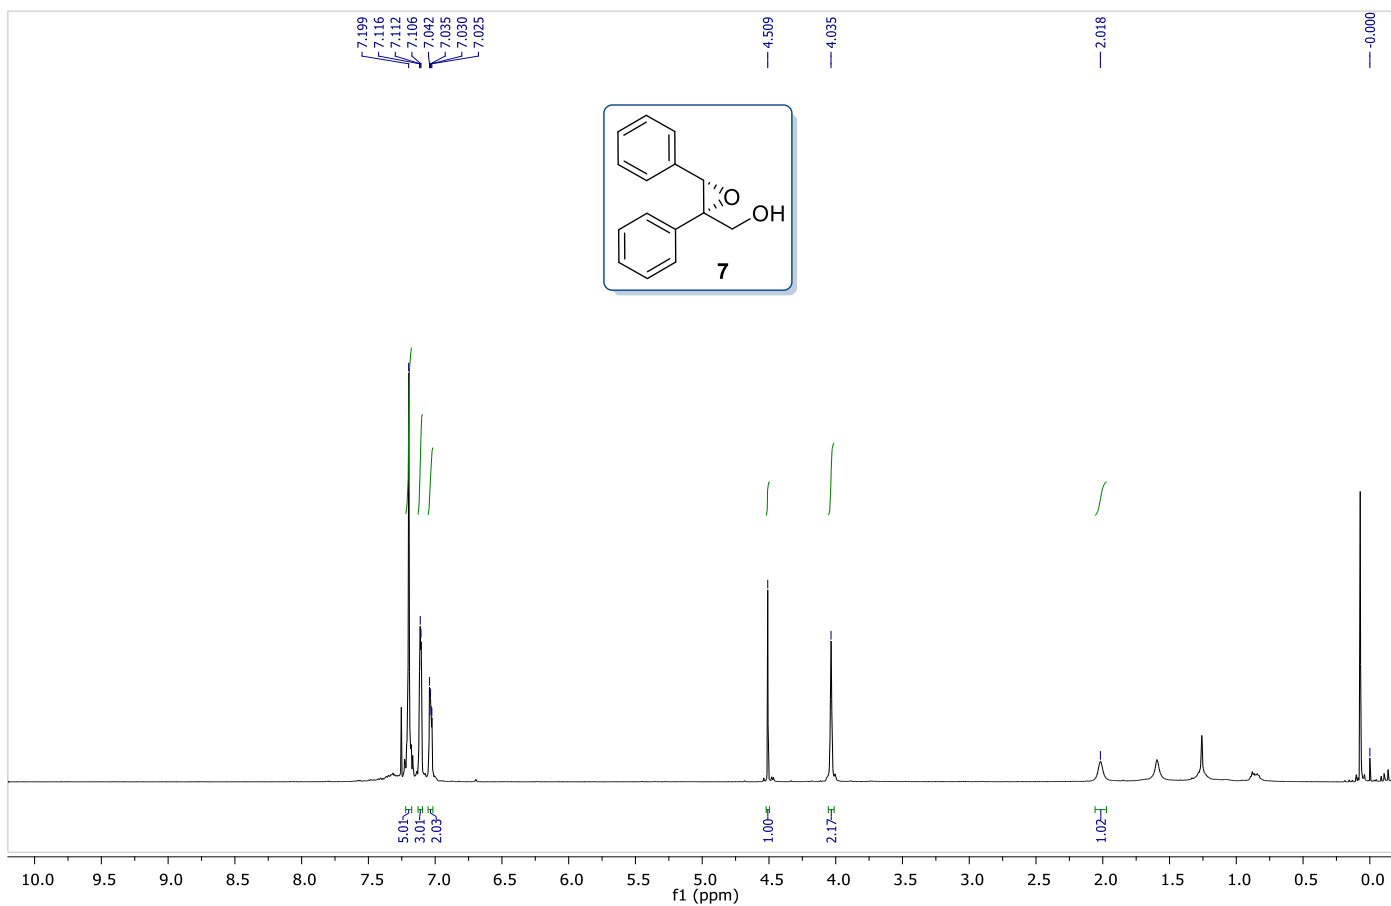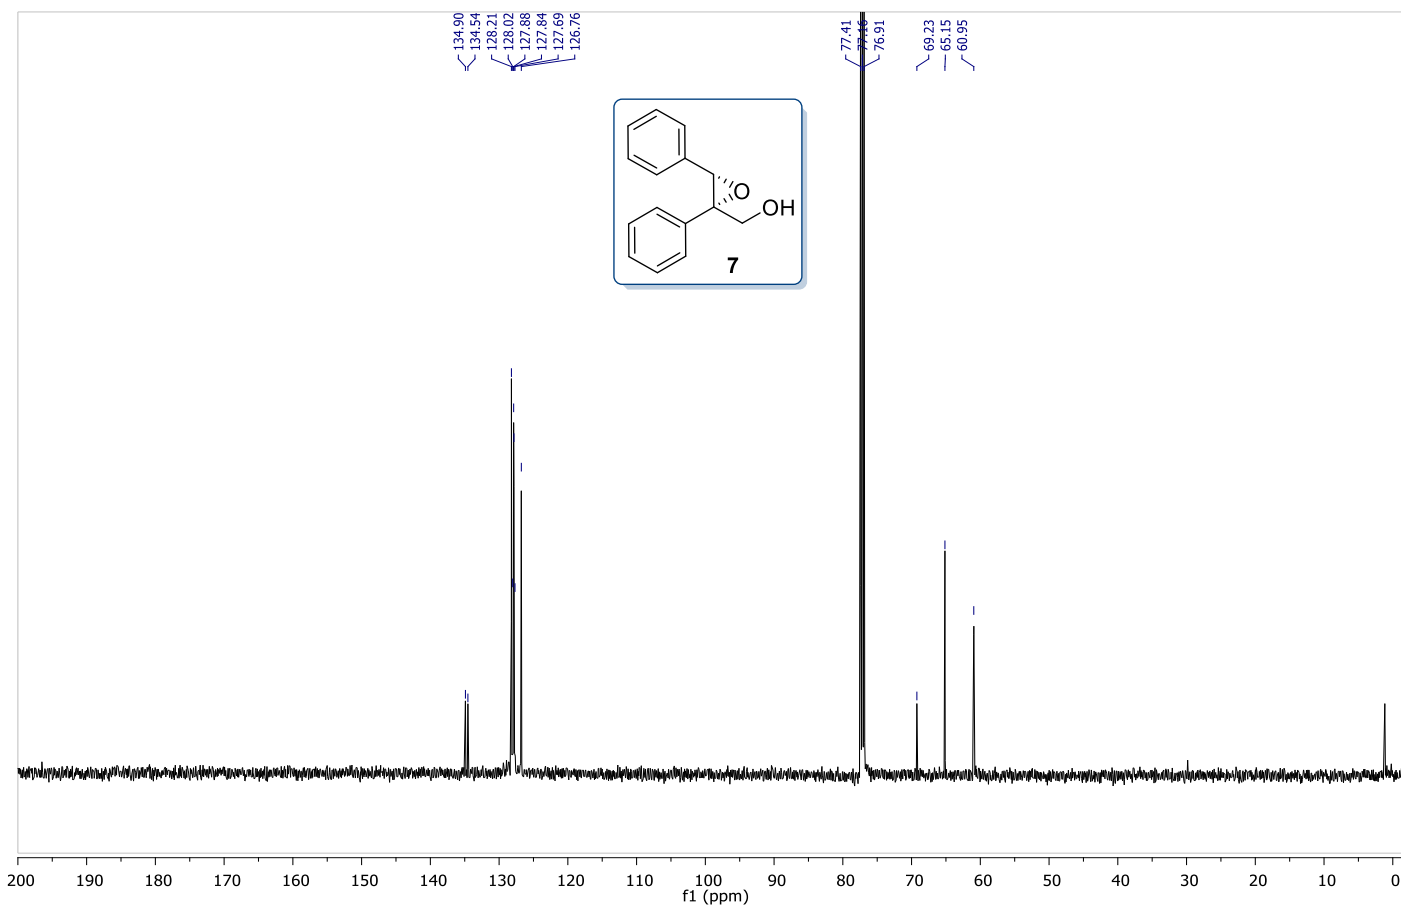

$^1\text{H}$  NMR (600 MHz,  $\text{CDCl}_3$ ) and  $^{13}\text{C}\{^1\text{H}\}$  NMR (151 MHz,  $\text{CDCl}_3$ ), **8**

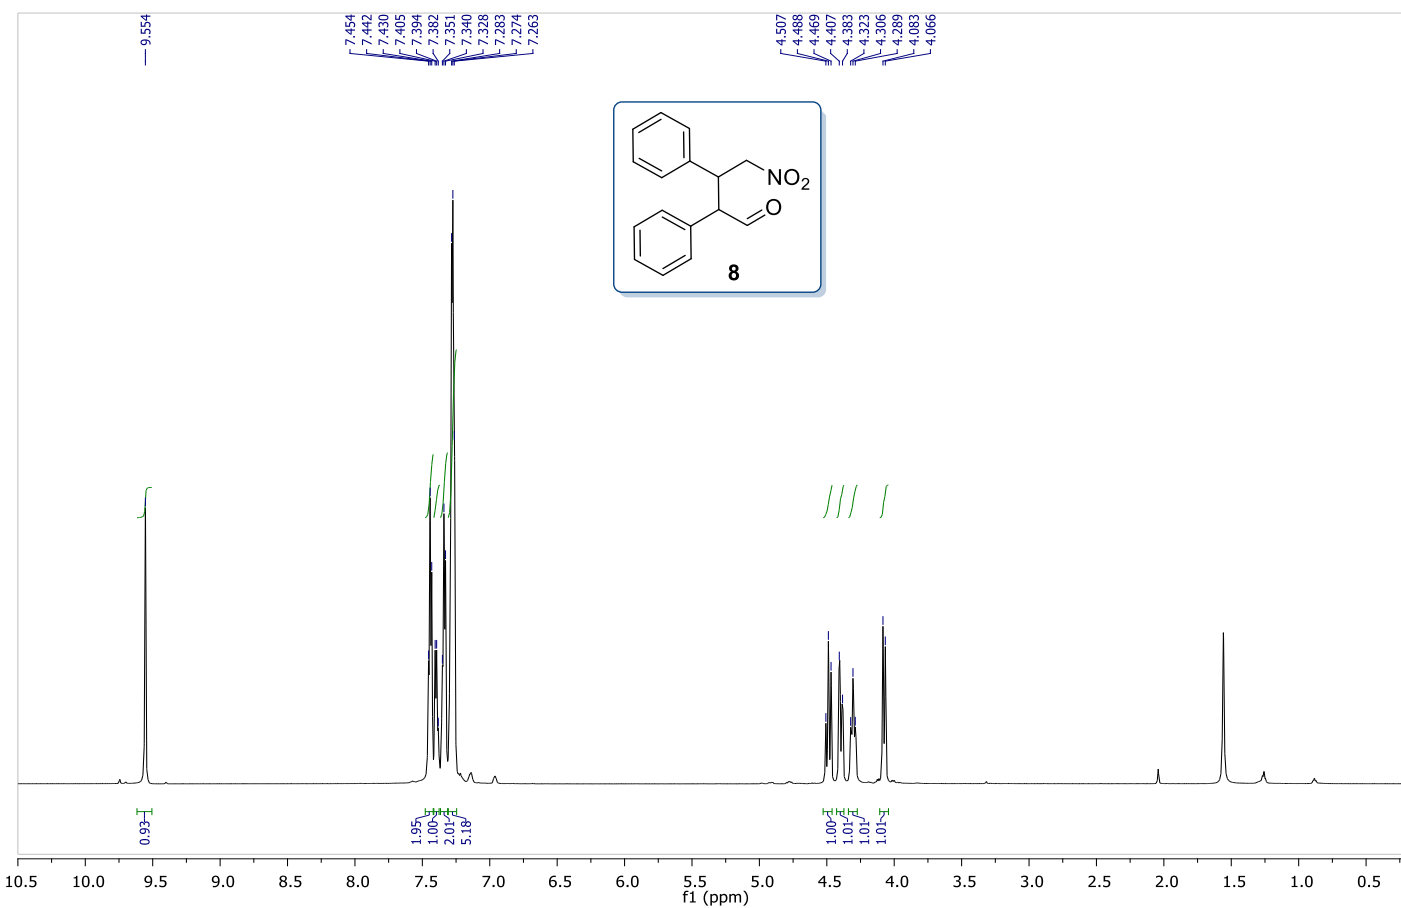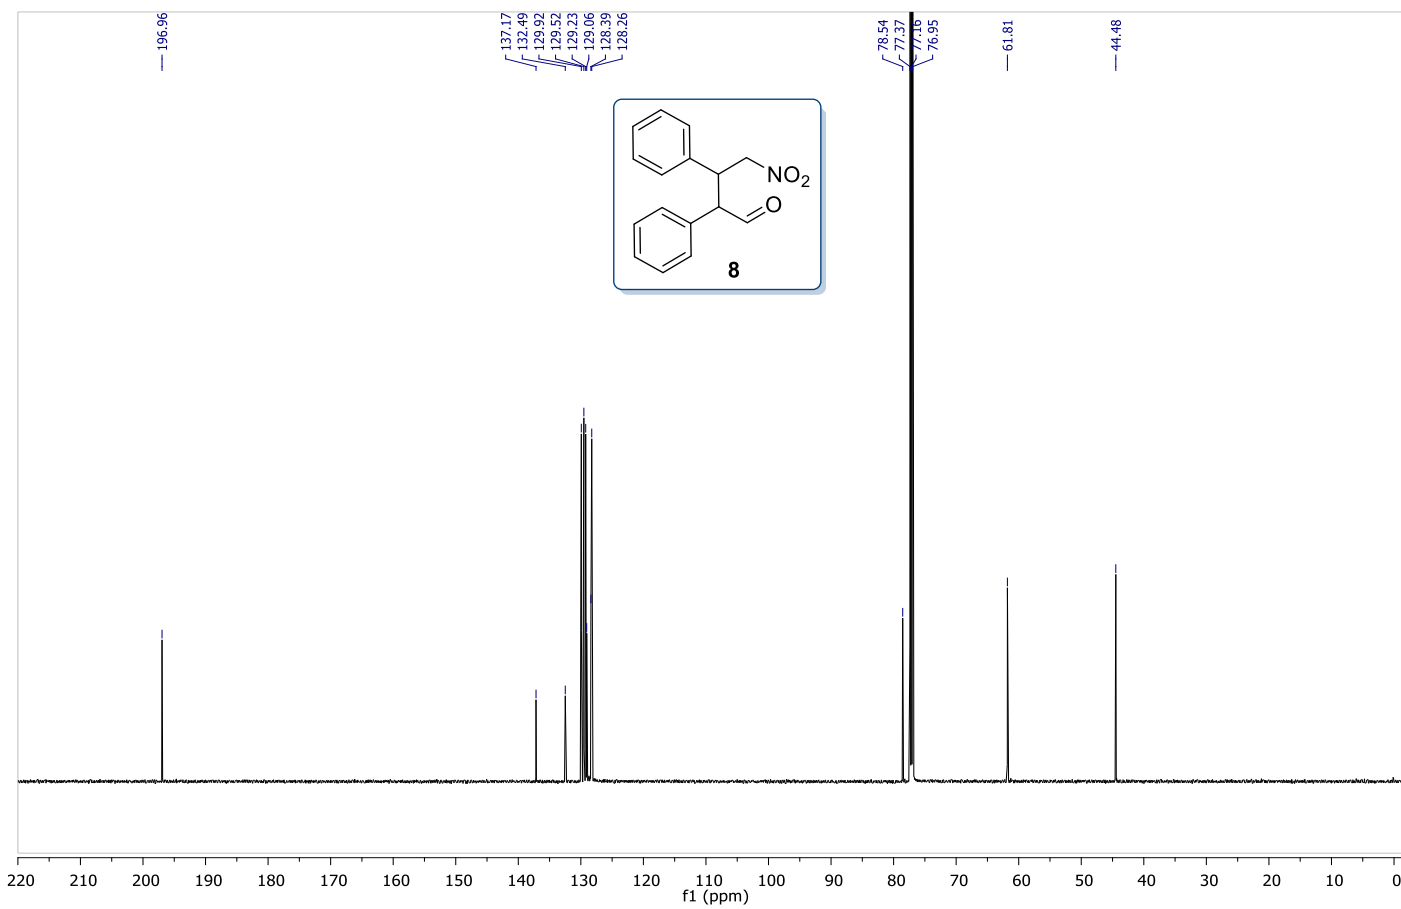

$^{19}\text{F}\{^1\text{H}\}$  NMR (471 MHz,  $\text{CDCl}_3$ ), **3am** and **3an**

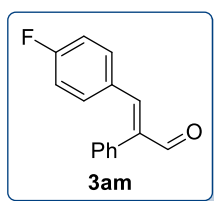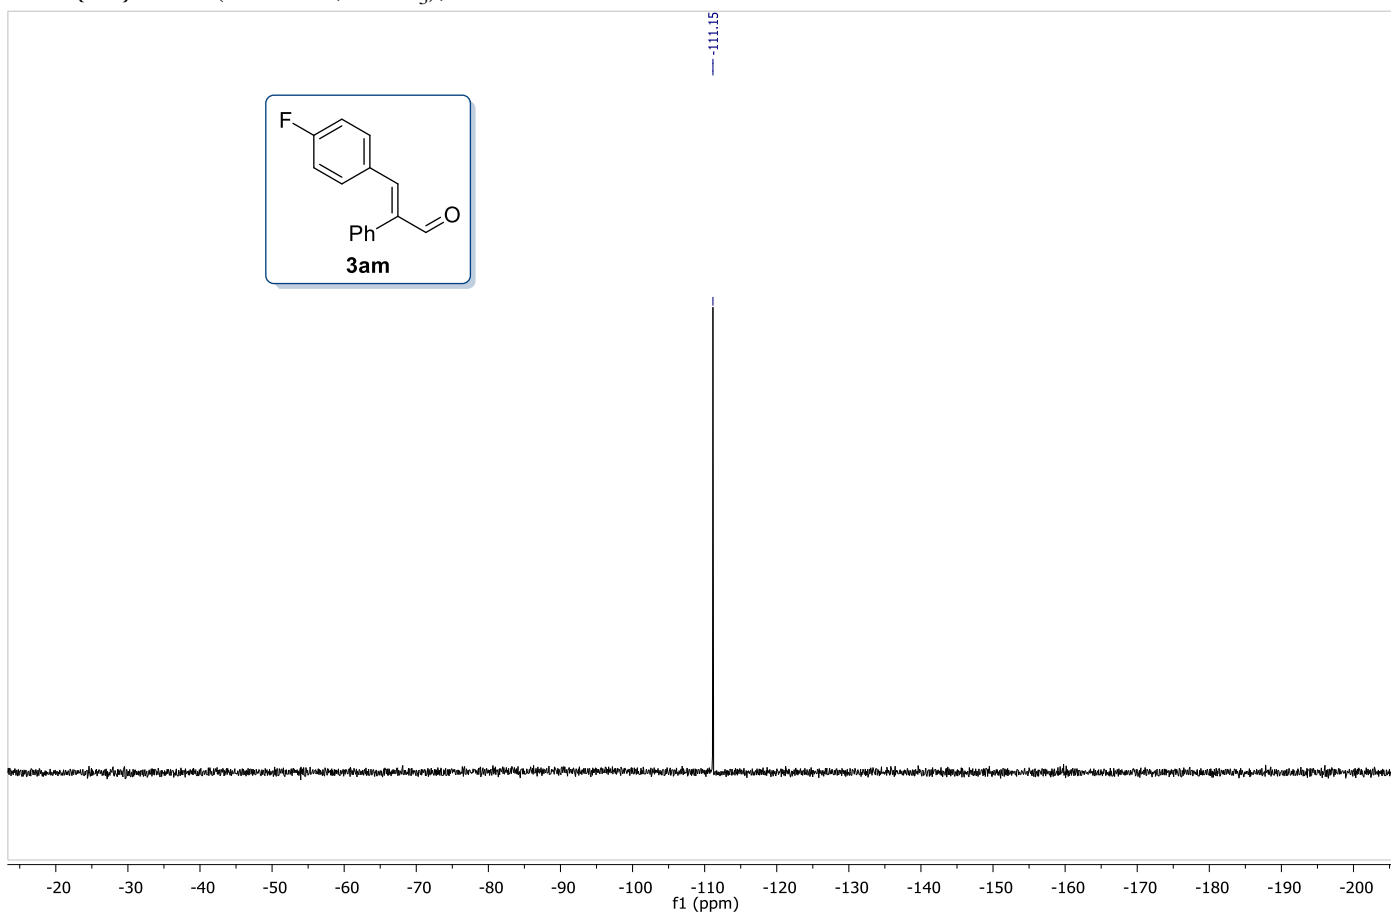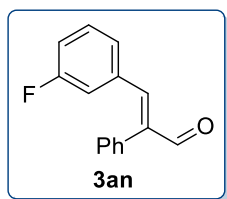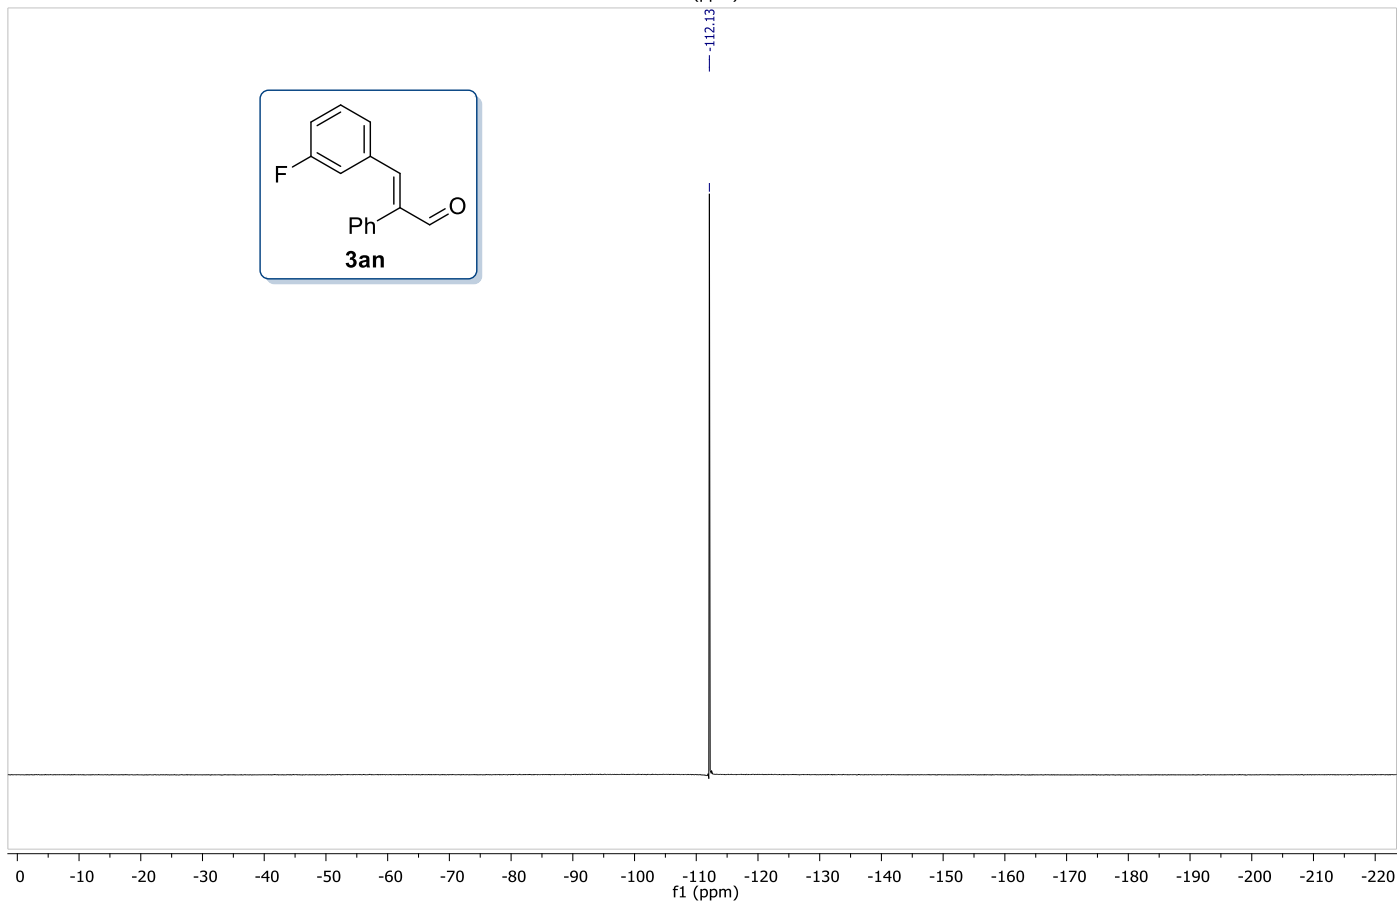

$^{19}\text{F}\{^1\text{H}\}$  NMR (471 MHz,  $\text{CDCl}_3$ ), **3ao** and **3ja**

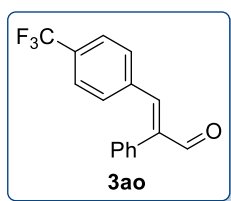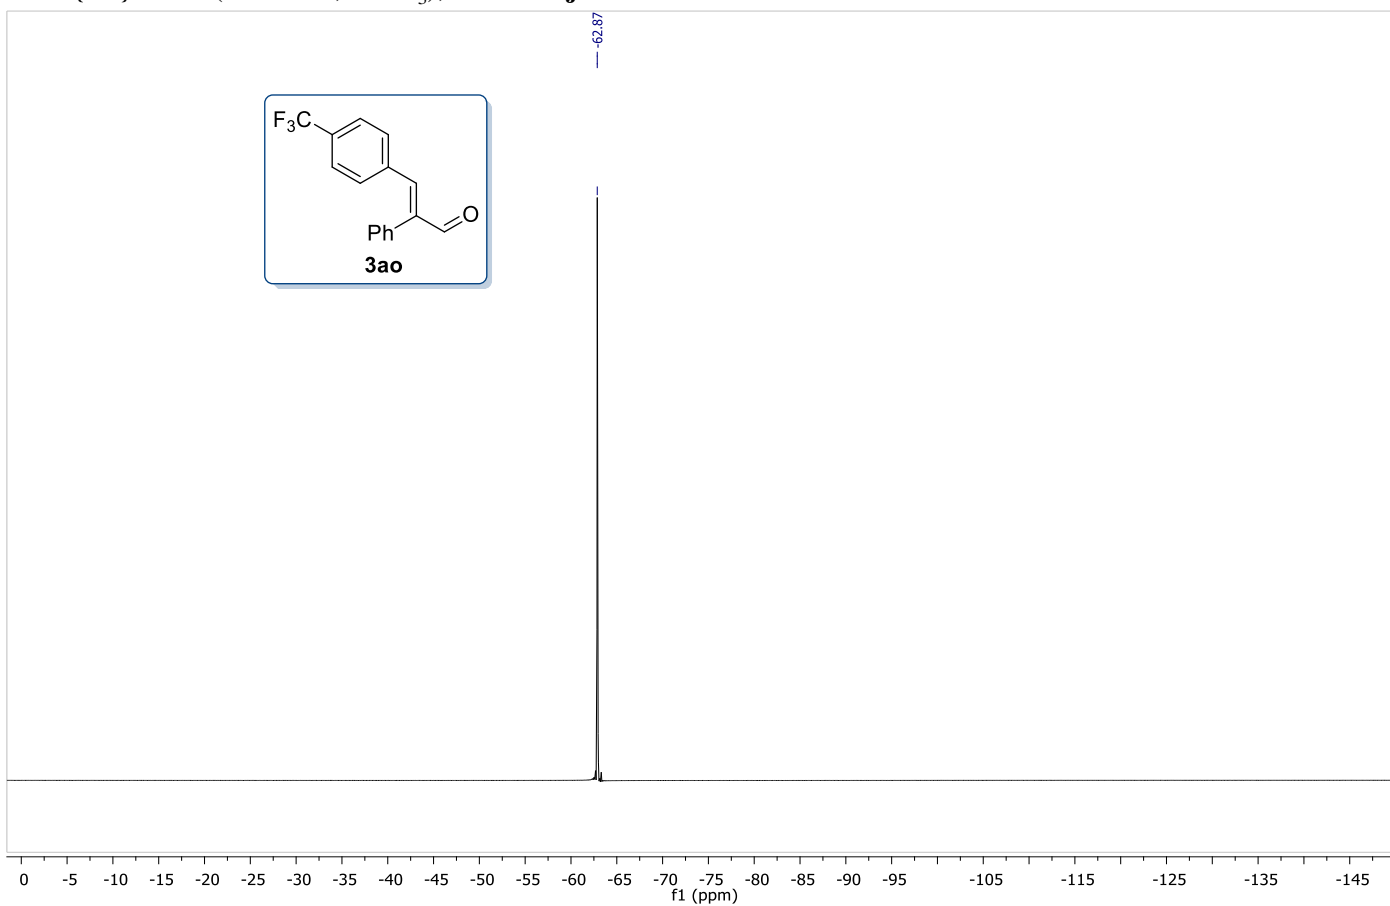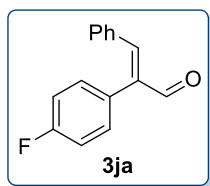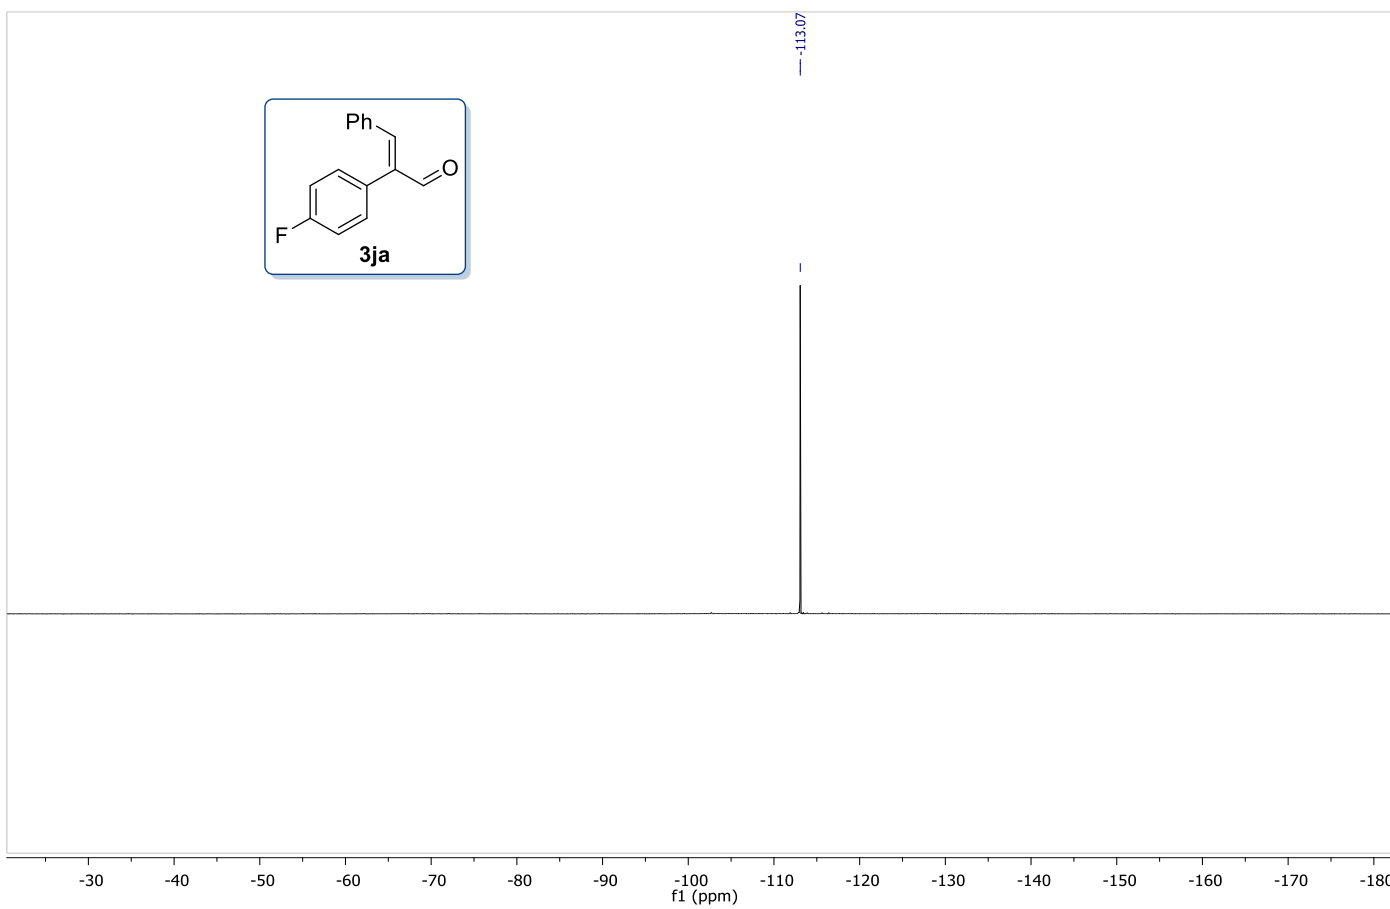

$^{19}\text{F}\{^1\text{H}\}$  NMR (471 MHz,  $\text{CDCl}_3$ ), **3ka** and **3la**

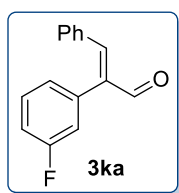

— -112.16

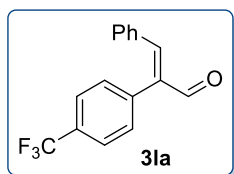

— -62.53

$^{19}\text{F}\{^1\text{H}\}$  NMR (471 MHz,  $\text{CDCl}_3$ ), **3cm** and **3ji**

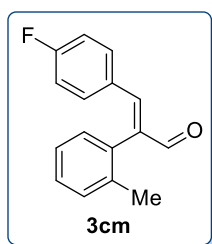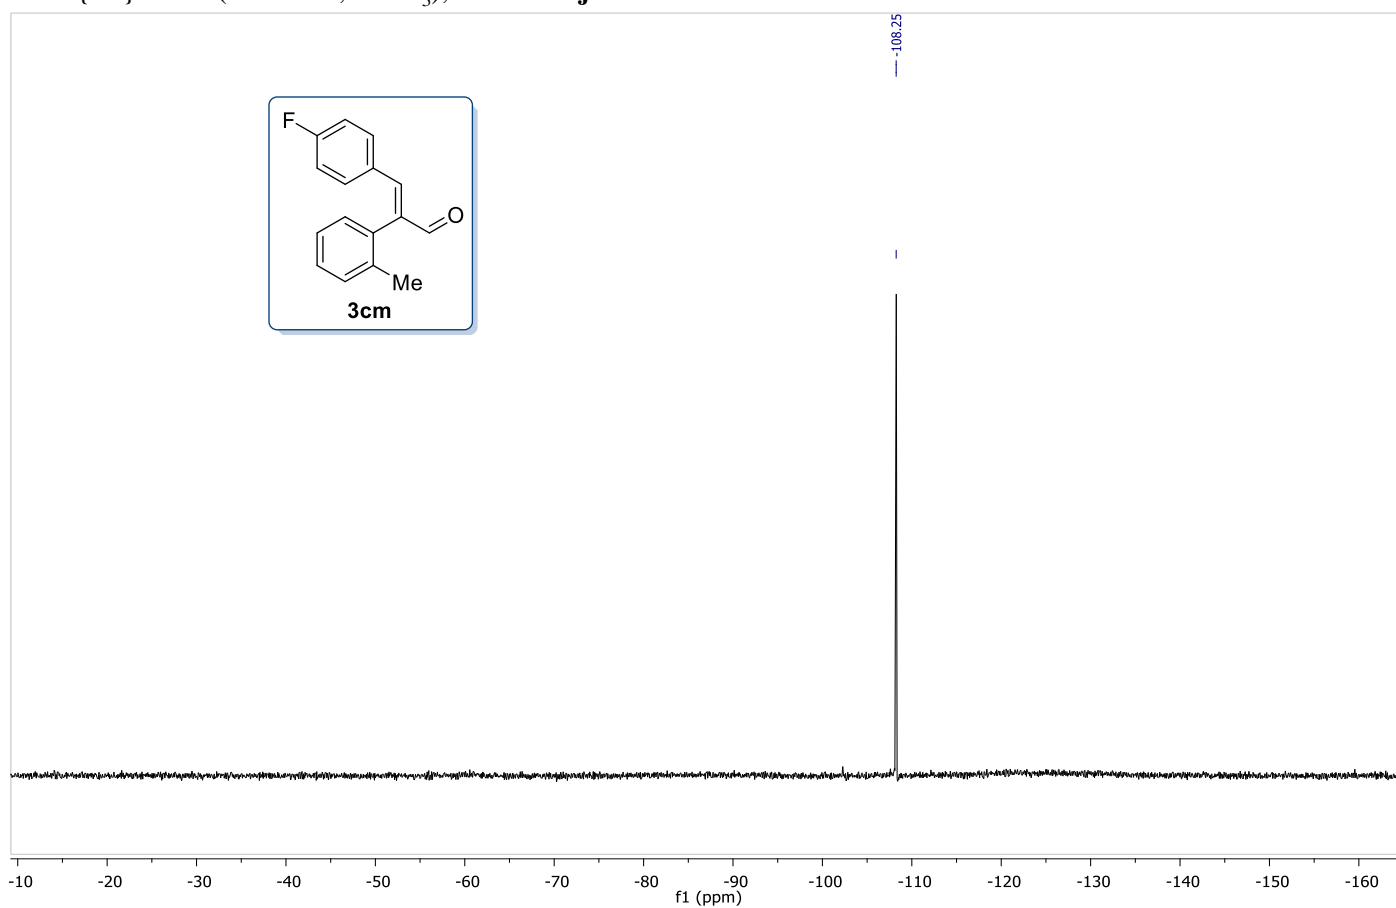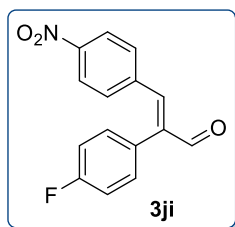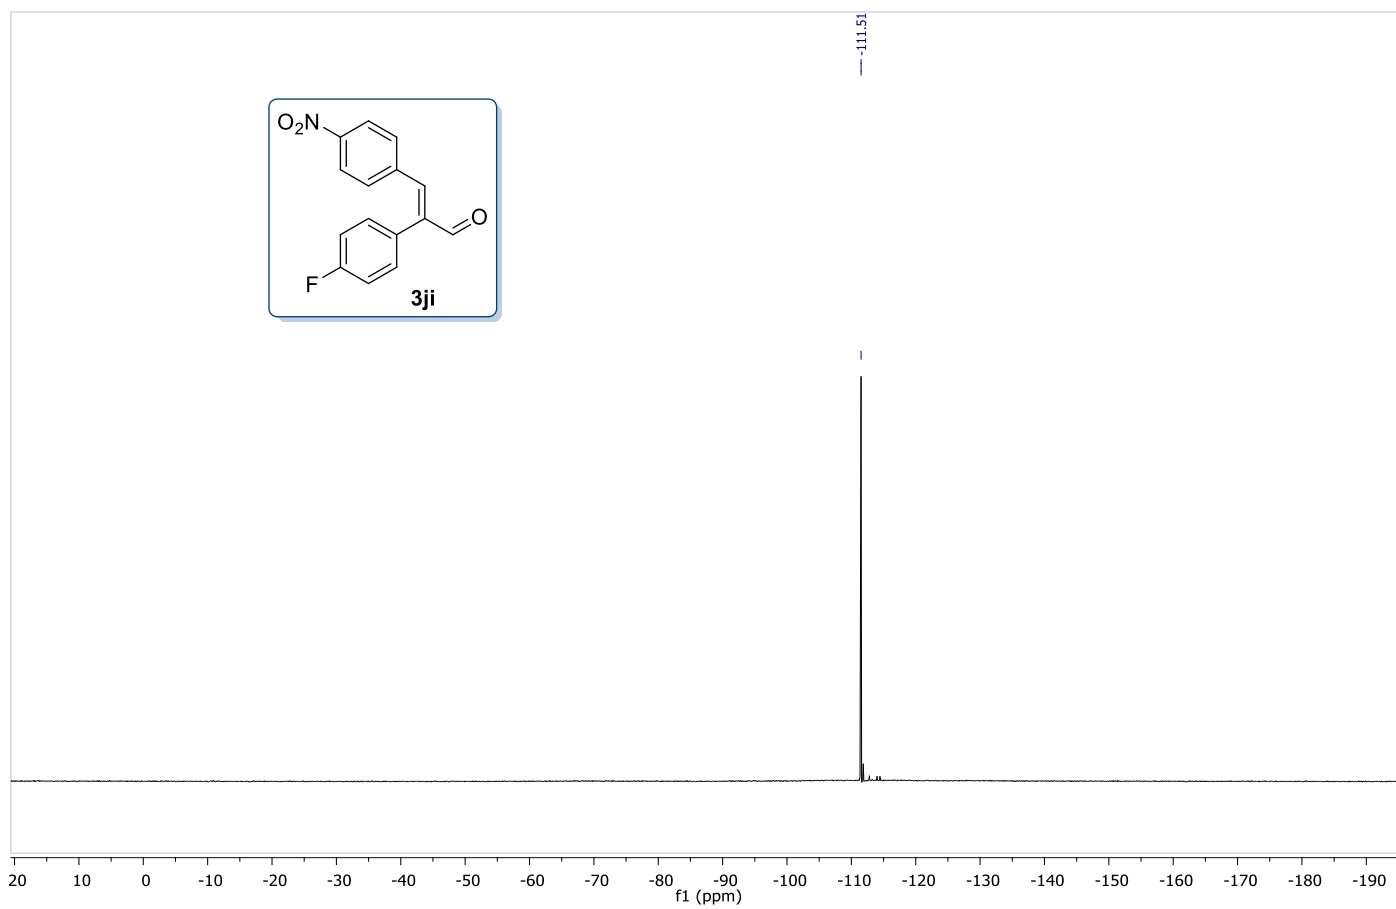

$^{19}\text{F}\{^1\text{H}\}$  NMR (471 MHz,  $\text{CDCl}_3$ ), **3Im**

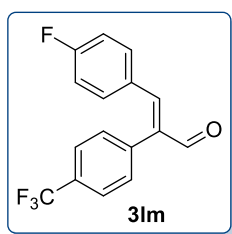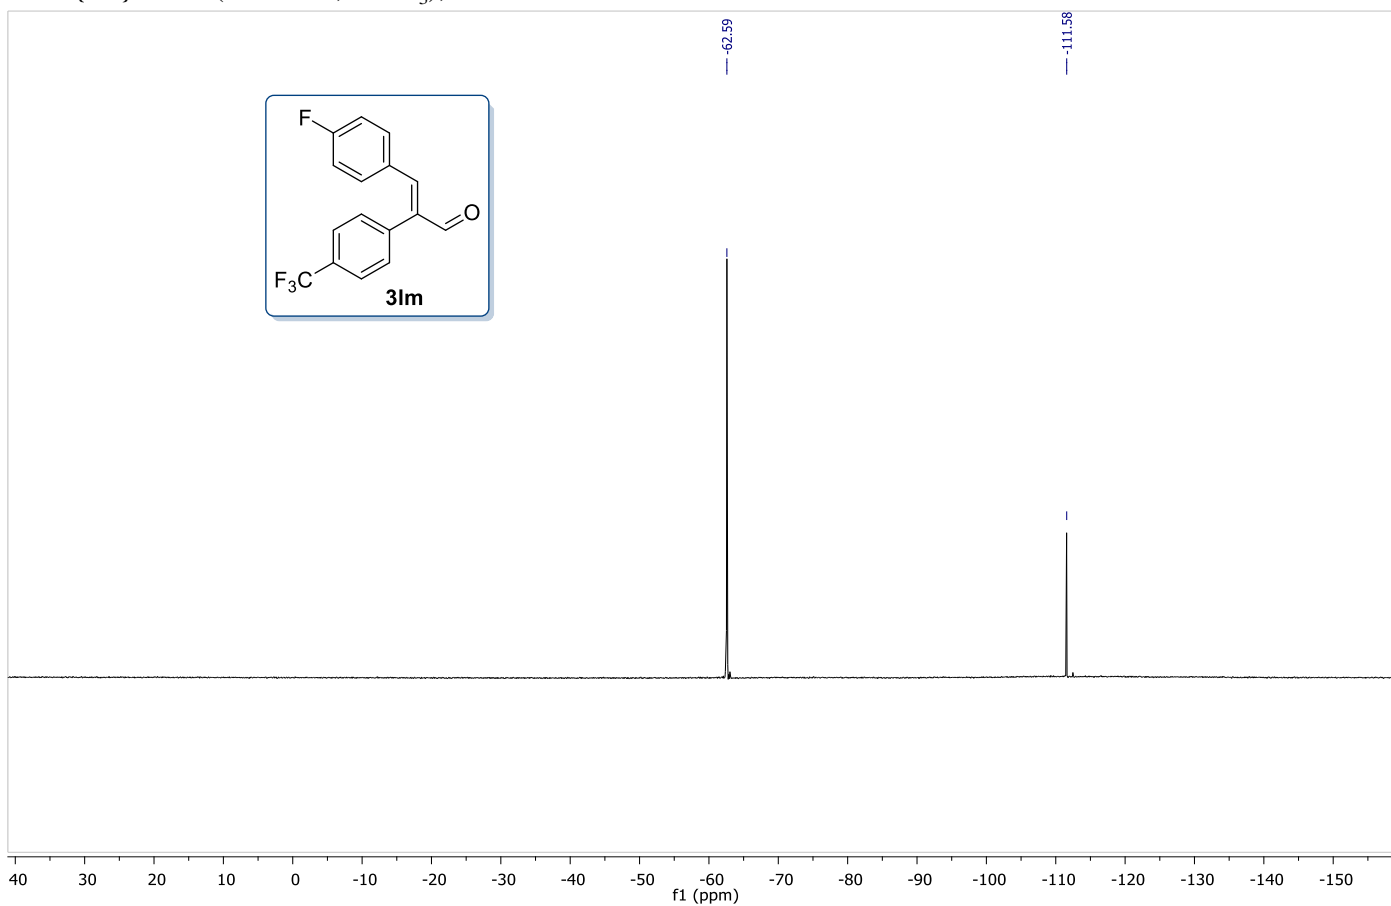

NOESY spectrum (CDCl<sub>3</sub>) , **3aj**

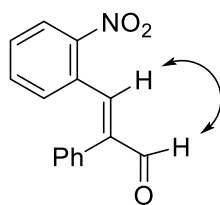

**3aj**

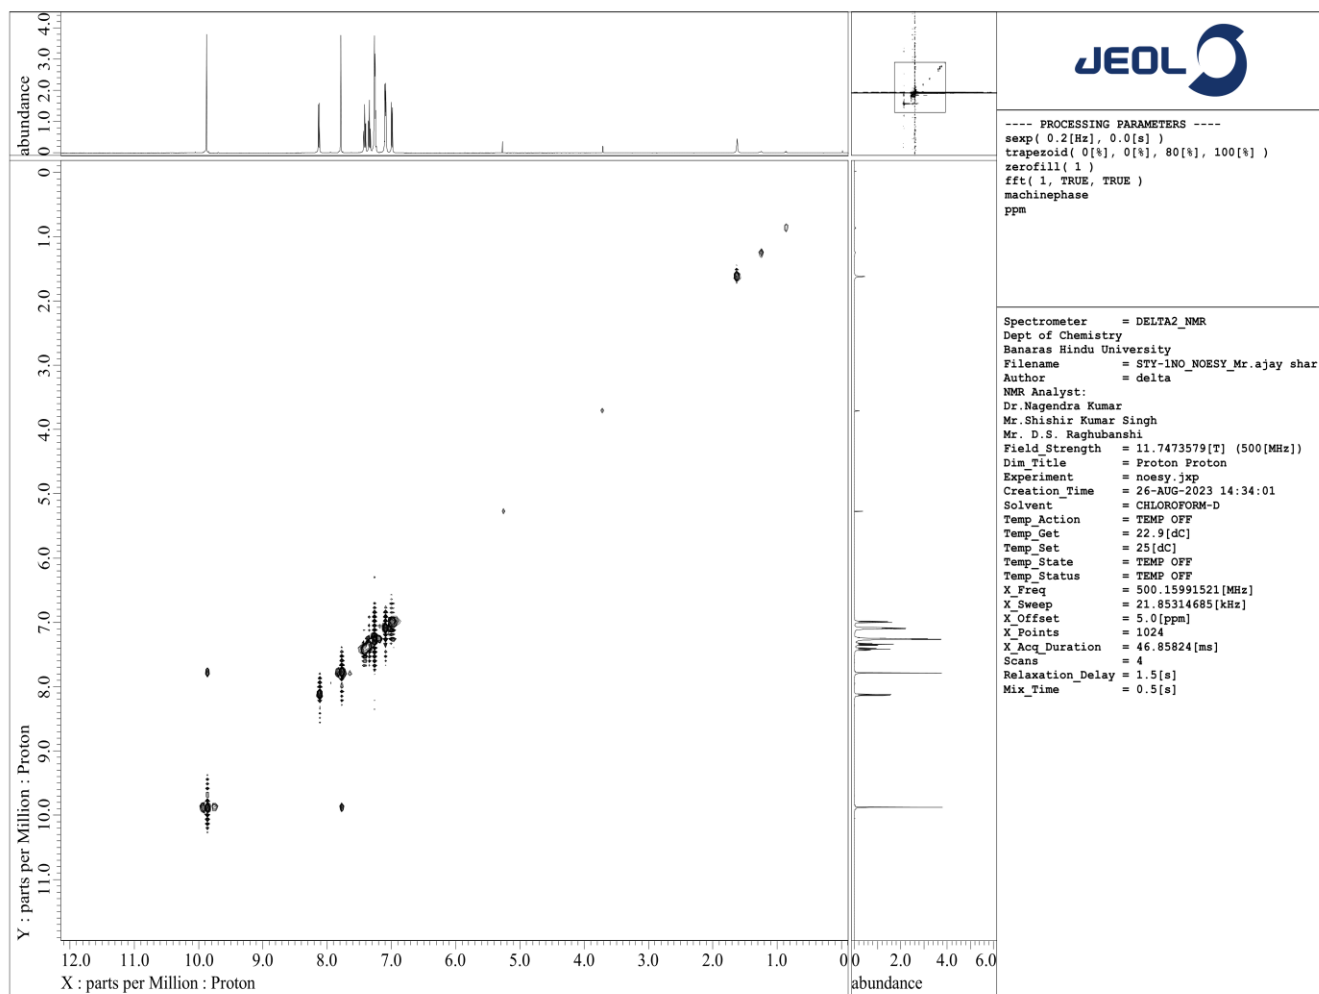

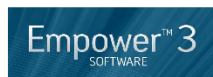

## Default Individual Report

## SAMPLE INFORMATION

|                   |                         |                     |                          |
|-------------------|-------------------------|---------------------|--------------------------|
| Sample Name:      | sty epo2-rec ADH 35     | Acquired By:        | System                   |
| Sample Type:      | Unknown                 | Sample Set Name:    |                          |
| Vial:             | 1                       | Acq. Method Set:    | 35% 25 254               |
| Injection #:      | 1                       | Processing Method:  | Sty Epo                  |
| Injection Volume: | 10.00 ul                | Channel Name:       | 225.0nm                  |
| Run Time:         | 100.0 Minutes           | Proc. Chnl. Descr.: | 2998 PDA 225.0 nm (2998) |
| Date Acquired:    | 09-06-2023 14:04:16 IST |                     |                          |
| Date Processed:   | 09-09-2023 12:32:36 IST |                     |                          |

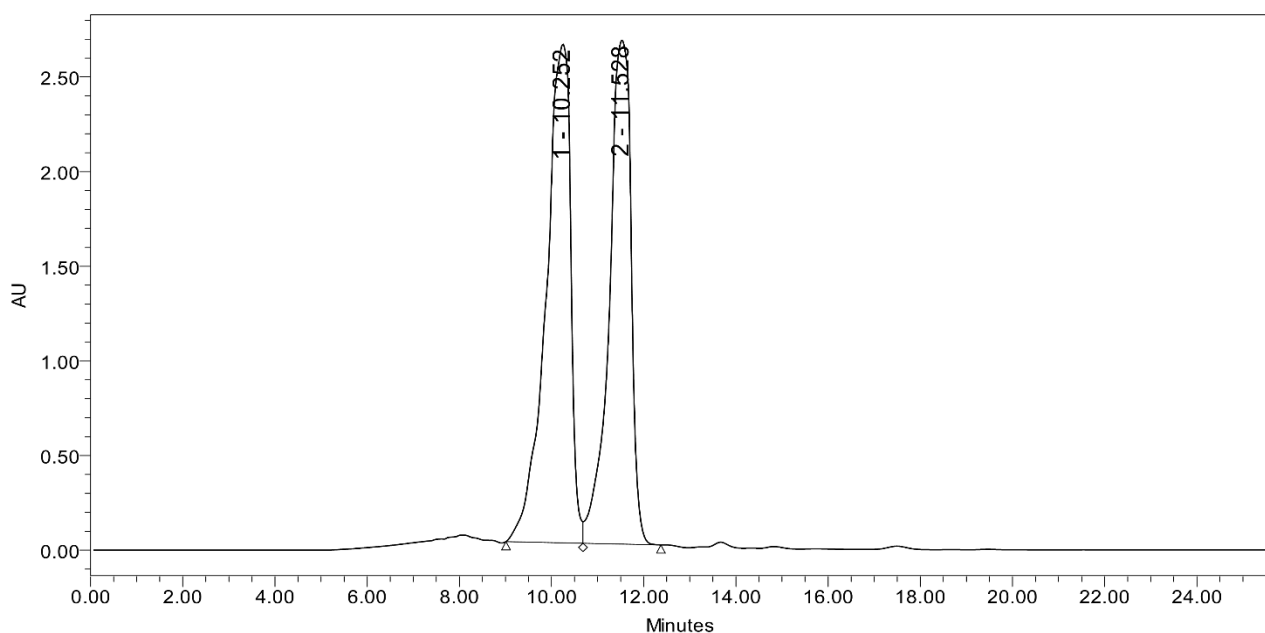

|   | Peak Name | RT     | Area     | % Area | Height  |
|---|-----------|--------|----------|--------|---------|
| 1 | 1         | 10.252 | 98342510 | 52.78  | 2634779 |
| 2 | 2         | 11.528 | 87969043 | 47.22  | 2661199 |

Reported by User: System  
Report Method: Default Individual Report  
Report Method ID: 1009  
Page: 1 of 1

Project Name: DEMO  
Date Printed:  
09-09-2023  
12:51:54 Asia/Calcutta

## SAMPLE INFORMATION

|                   |                         |                     |                          |
|-------------------|-------------------------|---------------------|--------------------------|
| Sample Name:      | sty epo2-chi ADH 35     | Acquired By:        | System                   |
| Sample Type:      | Unknown                 | Sample Set Name:    |                          |
| Vial:             | 1                       | Acq. Method Set:    | 35% 25 254               |
| Injection #:      | 1                       | Processing Method:  | ch                       |
| Injection Volume: | 10.00 ul                | Channel Name:       | 225.0nm@2                |
| Run Time:         | 100.0 Minutes           | Proc. Chnl. Descr.: | 2998 PDA 225.0 nm (2998) |
| Date Acquired:    | 09-06-2023 13:10:51 IST |                     |                          |
| Date Processed:   | 09-09-2023 12:58:56 IST |                     |                          |

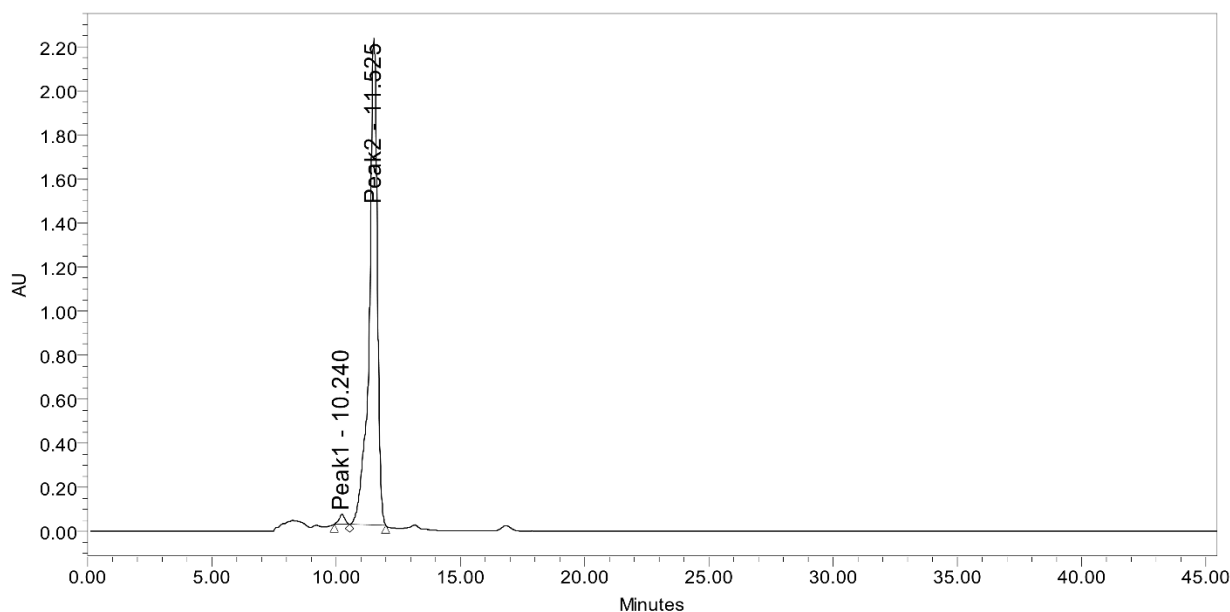

|   | Peak Name | RT     | Area     | % Area | Height  |
|---|-----------|--------|----------|--------|---------|
| 1 | Peak1     | 10.240 | 723326   | 1.41   | 45724   |
| 2 | Peak2     | 11.525 | 50467318 | 98.59  | 2208791 |

Reported by User: System  
Report Method: Default Individual Report  
Report Method ID: 1009  
Page: 1 of 1

Project Name: DEMO  
Date Printed:  
09-09-2023  
12:59:32 Asia/Calcutta

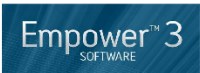

SAMPLE INFORMATION

|                   |                         |                     |                         |
|-------------------|-------------------------|---------------------|-------------------------|
| Sample Name:      | sty nic rec ADH10       | Acquired By:        | System                  |
| Sample Type:      | Standard                | Sample Set Name:    |                         |
| Vial:             | 1                       | Acq. Method Set:    | 90125                   |
| Injection#:       | 2                       | Processing Method:  | sty nic rec             |
| Injection Volume: | 20.00 ul                | Channel Name:       | 220.0nm                 |
| Run Time:         | 184.0 Minutes           | Proc. Chnl. Descr.: | FDA 220.0 nm(200-400)nm |
| Date Acquired:    | 9/9/2023 11:59:05 AMIST |                     |                         |
| Date Processed:   | 9/9/2023 2:44:56 PMIST  |                     |                         |

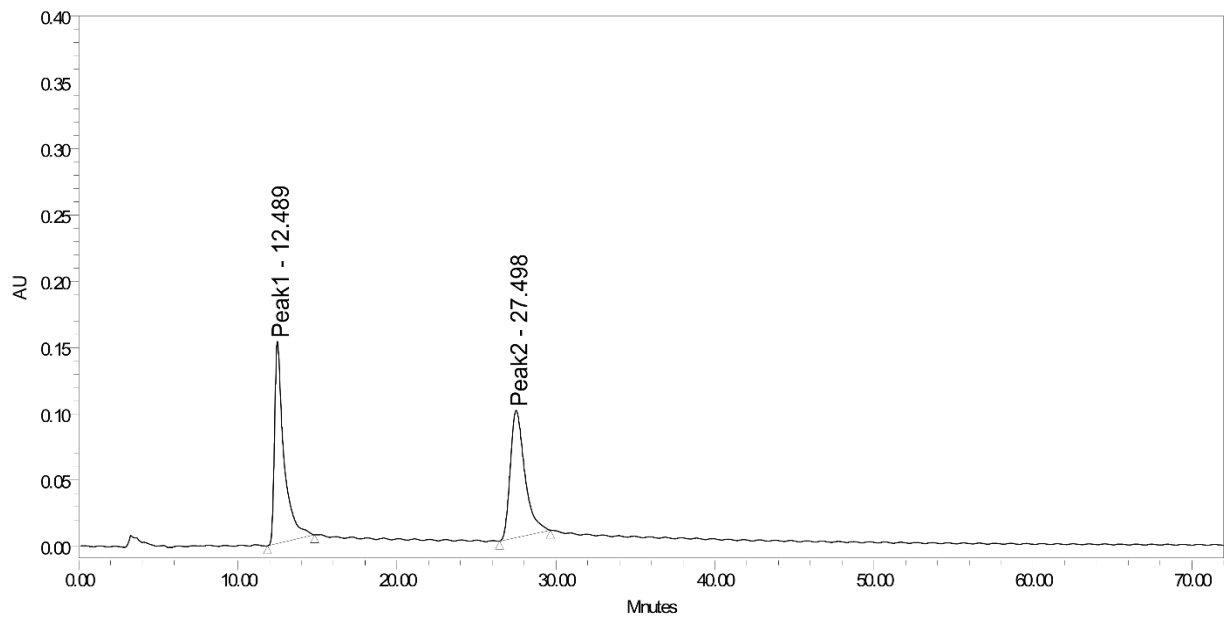

|   | Peak Name | RT     | Area    | %Area | Height |
|---|-----------|--------|---------|-------|--------|
| 1 | Peak1     | 12.489 | 6281474 | 50.66 | 152436 |
| 2 | Peak2     | 27.498 | 6116955 | 49.34 | 95965  |

## SAMPLE INFORMATION

|                   |                        |                     |                         |
|-------------------|------------------------|---------------------|-------------------------|
| Sample Name:      | sty nic chi 2 ADH10    | Acquired By:        | System                  |
| Sample Type:      | Standard               | Sample Set Name:    |                         |
| Vial:             | 1                      | Acq. Method Set:    | 90125                   |
| Injection#:       | 4                      | Processing Method:  | sty nic chi             |
| Injection Volume: | 20.00 ul               | Channel Name:       | 220.0nm                 |
| Run Time:         | 184.0 Minutes          | Proc. Chnl. Descr.: | FDA 220.0 nm(200-400)nm |
| Date Acquired:    | 9/8/2023 3:19:21 PMIST |                     |                         |
| Date Processed:   | 9/9/2023 2:49:42 PMIST |                     |                         |

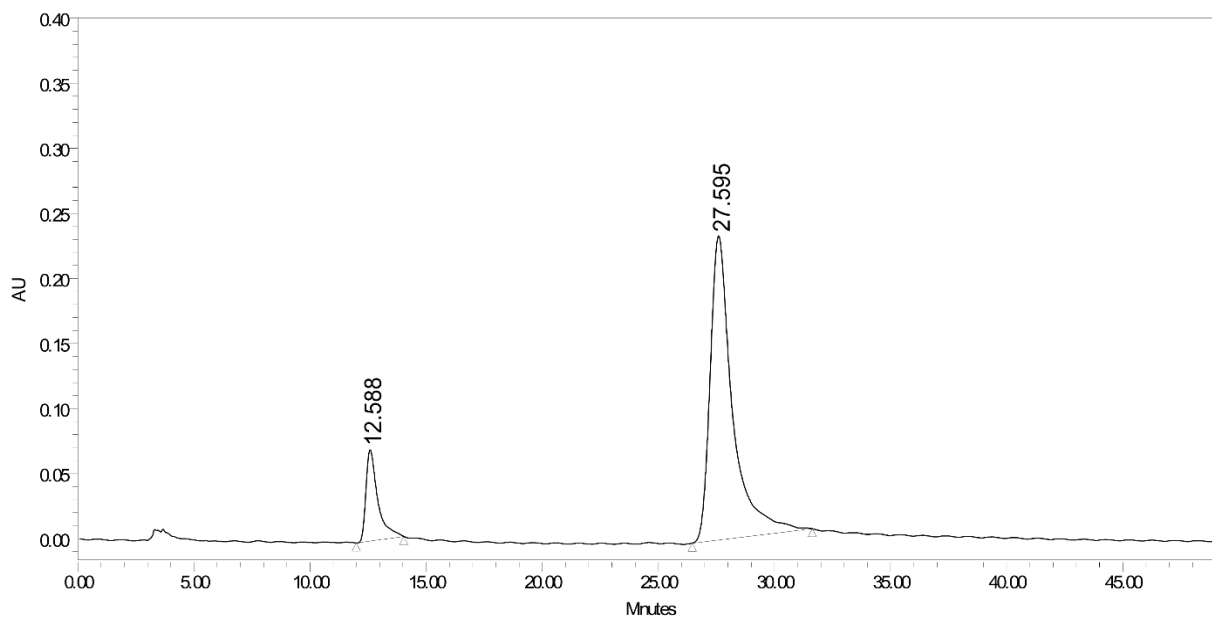

|   | RT     | Area    | %Area | Height |
|---|--------|---------|-------|--------|
| 1 | 12.588 | 249669  | 13.71 | 70199  |
| 2 | 27.595 | 1571894 | 86.29 | 233789 |

## HRMS spectra, **3aa'**

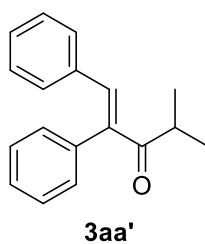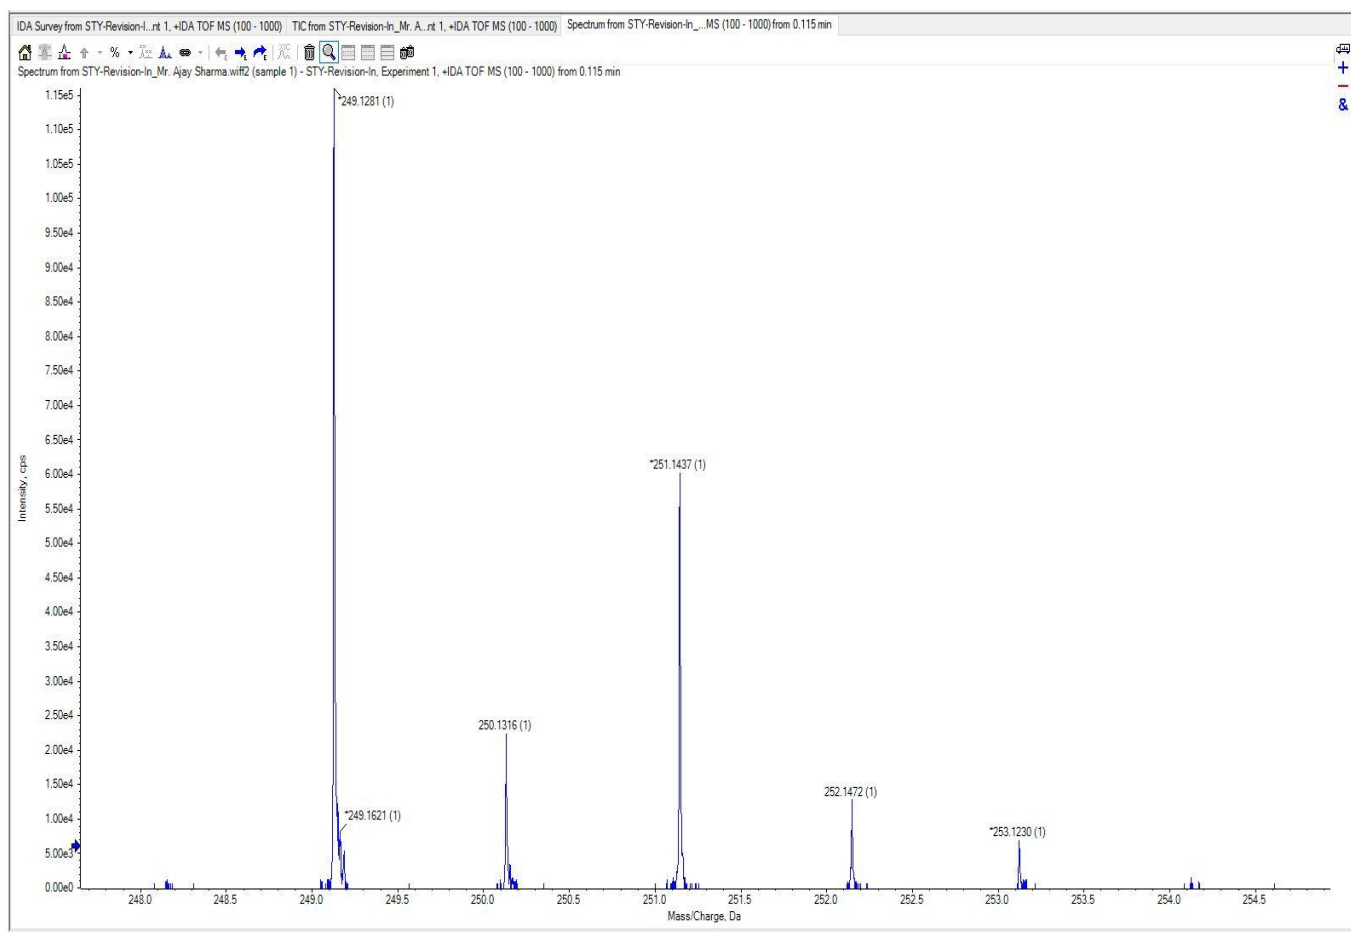

Supplement: d3ob01750h1.pdf [file d3ob01750h1.pdf]
